# Supplementary material for: Rational design of perylene diimide macrocycles with diverse electron transfer properties in complexes with fullerene
Source: Royal Society of Chemistry journal article supplement (doi:10.1039/d4tc02283a), 2024-01-01
Supplement: d4tc02283a2.pdf [file d4tc02283a2.pdf]

## Supporting information for:

### **Rational design of perylene diimide macrocycles with diverse electron transfer properties in complexes with fullerene**

A. J. Stasyuk<sup>\*a,b</sup>

a. Departament de Farmàcia i Tecnologia Farmacèutica, i Físicoquímica, Facultat de Farmàcia i Ciències de l'Alimentació & Institut de Química Teòrica i Computacional (IQTCUB), Universitat de Barcelona (UB), Av. Joan XXIII 27-31, 08028, Barcelona, Spain

b. Faculty of Chemistry, University of Warsaw, Pasteura 1, 02-093 Warsaw, Poland

\*Corresponding author. E-mail: anton.stasuk@gmail.com

#### **Abstract**

Perylene diimide (PDI)-based macrocycles offer a versatile platform for creating host-guest complexes with fullerenes. About 100 bay- and ortho-substituted PDIs, as well as their  $\pi$ -extended derivatives have been tested to select the best electron donor and electron acceptor systems. This work presents a computational study of macrocycles consisting of two PDI units linked by flexible spacers as hosts for C<sub>60</sub> fullerene. The results provide insight into their ground and excited state electronic properties and help to rationally design complexes with tailored photoinduced electron transfer behavior, thereby advancing the development of artificial photosystems. The results revealed that in the ground state, there is almost no electronic communication between macrocycle and fullerene. However, upon photoexcitation, the electron transfer from macrocycle to fullerene or vice versa was predicted, demonstrating a tunable directionality unprecedented in similar systems. The direction of electron transfer is determined by the electronic nature of the macrocycle. For electron-donating macrocycles, the electron is transferred from the macrocycle to fullerene, whereas for electron-accepting hosts, it occurs in the opposite direction. The electron transfer occurs within the normal Marcus region, with optimal electron transfer rates observed in specific complexes, making them interesting systems for photovoltaic technology. Based on the structure-electronic properties relationship, design principles for novel PDI-based macrocycles were formulated to guide chemists in developing advanced organic materials for photovoltaic applications.

## Table of Contents

|     |                                                                                                                                                                                                                                                               |            |
|-----|---------------------------------------------------------------------------------------------------------------------------------------------------------------------------------------------------------------------------------------------------------------|------------|
| 1.  | Computational methodology                                                                                                                                                                                                                                     | p. S3-S6   |
| 2.  | <b>Figure S1.</b> Structures of PDI molecules considered in this work.                                                                                                                                                                                        | p. S7-S9   |
| 3.  | <b>Figure S2.</b> Structures of <b>MC-PDI1</b> , <b>MC-PDI2</b> , <b>MC-PDI3</b> , <b>MC-PDI4</b> , <b>MC-PDI5</b> , and <b>MC-PDI6</b> macrocycles optimized in DCM within ONIOM model.                                                                      | p. S10     |
| 4.  | <b>Figure S3.</b> Plot of RDG vs. $\text{sign}(\lambda_2) \times \rho$ for <b>MC-PDI1</b> ⊃ <b>C60</b> , <b>MC-PDI2</b> ⊃ <b>C60</b> , <b>MC-PDI3</b> ⊃ <b>C60</b> , <b>MC-PDI4</b> ⊃ <b>C60</b> , and <b>MC-PDI6</b> ⊃ <b>C60</b> complexes.                 | p. S10     |
| 5.  | <b>Figure S4.</b> NCI isosurfaces of van der Waals interactions in <b>MC-PDI1</b> ⊃ <b>C60</b> , <b>MC-PDI2</b> ⊃ <b>C60</b> , <b>MC-PDI3</b> ⊃ <b>C60</b> , <b>MC-PDI4</b> ⊃ <b>C60</b> , and <b>MC-PDI6</b> ⊃ <b>C60</b> complexes.                         | p. S11     |
| 6.  | <b>Figure S5-S8.</b> Natural transition orbitals of the studied complexes.                                                                                                                                                                                    | p. S12-S15 |
| 7.  | <b>Table S1.</b> HOMO and LUMO energies as well as HOMO-LUMO (HL) gap for isolated individual PDIs considered in this work.                                                                                                                                   | p. S16-S17 |
| 8.  | <b>Table S2.</b> Charge separation between the fragments in ground state for <b>MC-PDI1</b> ⊃ <b>C60</b> , <b>MC-PDI2</b> ⊃ <b>C60</b> , <b>MC-PDI3</b> ⊃ <b>C60</b> , <b>MC-PDI4</b> ⊃ <b>C60</b> , and <b>MC-PDI6</b> ⊃ <b>C60</b> complexes.               | p. S17     |
| 8.  | <b>Table S3.</b> QTAIM parameters of selected BCPs related to non-covalent interactions in <b>MC-PDI1</b> ⊃ <b>C60</b> , <b>MC-PDI2</b> ⊃ <b>C60</b> , <b>MC-PDI3</b> ⊃ <b>C60</b> , <b>MC-PDI4</b> ⊃ <b>C60</b> , and <b>MC-PDI6</b> ⊃ <b>C60</b> complexes. | p. S17-S19 |
| 10. | <b>Table S4.</b> Relative energies and solvation energies calculated for <b>MC-PDI1</b> ⊃ <b>C60</b> , <b>MC-PDI2</b> ⊃ <b>C60</b> , <b>MC-PDI3</b> ⊃ <b>C60</b> , <b>MC-PDI4</b> ⊃ <b>C60</b> , and <b>MC-PDI6</b> ⊃ <b>C60</b> complexes in DCM.            | p. S19-S20 |
| 11. | Cartesian coordinates                                                                                                                                                                                                                                         | p. S21-S55 |
| 12. | References                                                                                                                                                                                                                                                    | p. S56-S57 |

# Computational Methodology

## Energy decomposition analysis

The interaction energy between MC-PDI macrocycle and fullerene in the gas phase was examined in the framework of the Kohn-Sham MO model using a quantitative energy decomposition into electrostatic interactions, Pauli repulsive orbital interactions and attractive orbital interactions, to which a term  $\Delta E_{\text{disp}}$  was added to account for the dispersion correction:<sup>1-3</sup>

$$\Delta E_{\text{int}} = \Delta E_{\text{elstat}} + \Delta E_{\text{Pauli}} + \Delta E_{\text{oi}} + \Delta E_{\text{disp}} \quad (1)$$

The term  $\Delta V_{\text{elstat}}$  corresponds to the classical electrostatic interactions between the unperturbed charge distributions of the prepared (i.e. deformed) fragments and is usually attractive. The Pauli repulsion,  $\Delta E_{\text{Pauli}}$ , comprises the destabilizing interactions between occupied orbitals and is responsible for any steric repulsion. The orbital interactions,  $\Delta E_{\text{oi}}$ , account for electron-pair bonding, charge transfer (i.e., donor-acceptor interactions between occupied orbitals on one moiety and unoccupied orbitals on the other, including HOMO-LUMO interactions) and polarization (empty-occupied orbital mixing on one fragment due to the presence of another fragment). The term  $\Delta E_{\text{disp}}$  accounts for the dispersion corrections.<sup>4,5</sup>

## Analysis of excited states

The quantitative analysis of exciton delocalization and charge transfer in the donor-acceptor complexes was carried out in terms of the transition density.<sup>6-8</sup> The analysis was done in the Löwdin orthogonalized basis. The matrix  ${}^{\lambda}\mathbf{C}$  of orthogonalized MO coefficients was obtained from the coefficients  $\mathbf{C}$  in the original basis  ${}^{\lambda}\mathbf{C} = \mathbf{S}^{1/2} \mathbf{C}$ , where  $\mathbf{S}$  is the atomic orbital overlap matrix. The transition density matrix  $\mathbf{T}^{0i}$  for an excited state  $\Phi_i^*$  constructed as a superposition of singly excited configurations (where an occupied MO  $\psi_j$  is replaced a virtual MO  $\psi_a$ ) is computed as,

$$\mathbf{T}_{\alpha\beta}^{0i} = \sum_{j\mathbf{a}} A_{j\rightarrow\mathbf{a}} {}^{\lambda}\mathbf{C}_{\alpha j} {}^{\lambda}\mathbf{C}_{\beta\mathbf{a}} \quad (2)$$

where  $A_{j\rightarrow\mathbf{a}}$  is the expansion coefficient.

A key quantity  $\Omega(\mathbf{D},\mathbf{A})$  is determined by:

$$\Omega(\mathbf{D},\mathbf{A}) = \sum_{\alpha\in\mathbf{D},\beta\in\mathbf{A}} \left( \mathbf{T}_{\alpha\beta}^{0i} \right)^2 \quad (3)$$

The weights of local excitations on donor ( $\mathbf{D}$ ) and acceptor ( $\mathbf{A}$ ) are  $\Omega(\mathbf{D},\mathbf{D})$  and  $\Omega(\mathbf{A},\mathbf{A})$ . The weights of electron transfer configurations  $\mathbf{D}\rightarrow\mathbf{A}$  and  $\mathbf{A}\rightarrow\mathbf{D}$  are represented by  $\Omega(\mathbf{D},\mathbf{A})$  and  $\Omega(\mathbf{A},\mathbf{D})$ , respectively. The index  $\Delta q$ , which describes charge separation and charge transfer between  $\mathbf{D}$  and  $\mathbf{A}$ , is

$$\Delta q(\text{CS}) = \sum \Omega(\mathbf{D}, \mathbf{A}) - \Omega(\mathbf{A}, \mathbf{D}) \quad (4)$$

$$\Delta q(\text{CT}) = \sum \Omega(\mathbf{D}, \mathbf{A}) + \Omega(\mathbf{A}, \mathbf{D}) \quad (5)$$

### Solvent Effects

The equilibrium solvation energy  $E_s^{\text{eq}}$  of a molecule (in the ground or excited state) in the medium with the dielectric constant  $\varepsilon$  was estimated using a COSMO-like polarizable continuum model<sup>9-12</sup> in the monopole approximation:

$$E_s^{\text{eq}}(\mathbf{Q}, \varepsilon) = -\frac{1}{2} f(\varepsilon) \mathbf{Q}^+ \mathbf{D} \mathbf{Q} \quad (6)$$

where the  $f(\varepsilon)$  is the dielectric scaling factor,  $f(\varepsilon) = \frac{\varepsilon - 1}{\varepsilon}$ ,  $\mathbf{Q}$  – the vector of  $n$  atomic charges in the molecular system,  $\mathbf{D}$  is the  $n \times n$  symmetric matrix determined by the shape of the boundary surface between solute and solvent.  $\mathbf{D} = \mathbf{B}^+ \mathbf{A}^{-1} \mathbf{B}$ , where the  $m \times m$  matrix  $\mathbf{A}$  describes electrostatic interaction between  $m$  surface charges and the  $m \times n$   $\mathbf{B}$  matrix describes the interaction of the surface charges with  $n$  atomic charges of the solute.<sup>9,13</sup> The GEPOL93 scheme<sup>14</sup> was used to construct the molecular boundary surface.

The charge on atom X in the excited state  $\Phi_i^*$ ,  $q_X^i$ , was calculated as:

$$q_X^i = q_X^0 + \Delta_X^i, \quad \Delta_X^i = \sum_{Y \neq X} \sum_{\alpha \in X, \beta \in Y} (T_{\alpha\beta}^{0i} T_{\alpha\beta}^{0i} - T_{\beta\alpha}^{0i} T_{\beta\alpha}^{0i}), \quad (7)$$

where  $q_X^0$  is the atomic charge on A in the ground state and  $\Delta_X^i$  is its change due to the redistribution of the electron density between the atoms X and the rest of atoms Y, which is caused by the excitation  $\psi_0 \rightarrow \Phi_i^*$ .

The non-equilibrium solvation energy for excited state  $\Phi_i^*$  can be estimated as:<sup>15</sup>

$$E_s^{\text{neq}}(\mathbf{Q}^0, \Delta, \varepsilon, n^2) = f(\varepsilon) \Delta^+ \mathbf{D} \mathbf{Q}^0 - \frac{1}{2} f(n^2) \Delta^+ \mathbf{D} \Delta, \quad (8)$$

In Eq. (8),  $n^2$  (the refraction index squared) is the optical dielectric constant of the medium and the vector  $\Delta$  describes the change of atomic charges in the molecule by excitation in terms of atomic charges, see Eq. (7). By definition, the external (solvent) reorganization energy is the difference of the non-equilibrium (Eq. 8) and equilibrium (Eq. 6) solvation energies of the excited state.

### Reorganization energy

The reorganization energy is usually divided into two parts,  $\lambda = \lambda_i + \lambda_s$ , including the internal and solvent terms. The solvent reorganization energy corresponds to the energy required to move solvent molecules

from the position they occupy in the initial state to the location they have in the CT state, but without charge transfer having occurred. The  $\lambda_s$  for a particular CT state was computed as a difference between the equilibrium ( $E_s^{\text{eq}}$ , see eq. 6) and non-equilibrium ( $E_s^{\text{neq}}$ , see eq. 8) solvation energies. The internal reorganization energy  $\lambda_i$  corresponds to the energy of structural changes when donor/acceptor fragments going from initial-state geometries to final-state geometries.

$\lambda_i = \lambda_i^1 + \lambda_i^2$ , where for CT1:

$$\begin{aligned} \lambda_i^1(C_{60}^0 \rightarrow C_{60}^-) &= \frac{1}{2} \left[ \left( (C_{60}^0)_- - (C_{60}^0)_0 \right) + \left( (C_{60}^-)_0 - (C_{60}^-)_- \right) \right] \\ \lambda_i^2(MC^* \rightarrow MC^+) &= \frac{1}{2} \left[ \left( (MC^*)_+ - (MC^*)_0 \right) + \left( (MC^+)_0 - (MC^+)_+ \right) \right], \text{ or for CT2} \\ \lambda_i^1(C_{60}^0 \rightarrow C_{60}^+) &= \frac{1}{2} \left[ \left( (C_{60}^0)_+ - (C_{60}^0)_0 \right) + \left( (C_{60}^+)_0 - (C_{60}^+)_+ \right) \right] \\ \lambda_i^2(MC^* \rightarrow MC^-) &= \frac{1}{2} \left[ \left( (MC^*)_0 - (MC^*)_+ \right) + \left( (MC^-)_+ - (MC^-)_0 \right) \right] \end{aligned} \quad (9)$$

### Electron transfer rates

The rate of the nonadiabatic electron transfer (ET),  $k_{ET}$ , can be expressed in terms of the electronic coupling squared,  $V^2$ , and the Franck-Condon Weighted Density of states (FCWD):

$$k_{ET} = \frac{2\pi}{\hbar} V^2 (FCWD) \quad (10)$$

that accounts for the overlap of vibrational states of donor and acceptor and can be approximately estimated using the classical Marcus equation:<sup>16</sup>

$$(FCWD) = (4\pi\lambda kT)^{-1/2} \exp \left[ -(\Delta G^0 + \lambda)^2 / 4\lambda kT \right] \quad (11)$$

where  $\lambda$  is the reorganization energy and  $\Delta G^0$  is the standard Gibbs energy change of the process. The fragment charge difference (FCD)<sup>17,18</sup> method was employed to calculate the electronic couplings in this work.

The Marcus expression is derived for the high-temperature condition,  $\hbar\omega_l \ll kT$ , for all vibrational modes  $l$ . The semi-classical description of ET<sup>19,20</sup> includes the effect of the quantum vibrational modes in an effective way, the solvent (low frequency) modes are treated classically, while a single high-frequency intramolecular mode  $\omega_i$ ,  $\hbar\omega_i \gg kT$ , is described quantum mechanically. Because ET occurs normally from the lowest vibrational level of the initial state, the rate  $k$  can be expressed as a sum over all channels connecting the initial state with the vibrational quantum number  $n = 0$  to manifold vibrational levels of the final state,

$$k = \sum_{n=0}^{\infty} k_{0 \rightarrow n}, \text{ where } k_{0 \rightarrow n} = \frac{2\pi}{\hbar} V_{0 \rightarrow n}^2 \frac{1}{\sqrt{4\pi\lambda_s kT}} \exp \left[ -\frac{(\Delta G + n\hbar\omega_i + \lambda_s)^2}{4\lambda_s kT} \right] \quad (12)$$

with

$$V_{0 \rightarrow n}^2 = V^2 \frac{S^n}{n!} \exp(-S) \quad (13)$$

An effective value of the Huang-Rhys factor  $S$  is estimated from the internal reorganization energy  $\lambda_i$ ,

$$S = \lambda_i / \hbar\omega_i$$

As seen, an additional parameter (compared to the Marcus equation) enters the semi-classical expression - the frequency  $\omega_i$  of a vibrational mode that effectively describes the nuclear intramolecular relaxation following the ET. Typically, in organic systems (including fullerene and other carbon nanostructures) the main contribution to the internal reorganization energy is due to stretching of C=C bonds. The corresponding frequencies are found to be in the range of 1400-1800  $\text{cm}^{-1}$ .

### Quantum Theory of Atoms in Molecules (QTAIM)

Topological analysis of the electron density distributions was conducted using the “Quantum Theory of Atoms in Molecules” (QTAIM) proposed by Bader.<sup>21,22</sup> Electron density properties measured at the bond critical point (BCP) give information about the character of different chemical bonds.<sup>23-25</sup> The AIMALL suite of programs<sup>26</sup> was applied to evaluate BCP properties and associated bond descriptors – electron density [ $\rho(r)$ ], its Laplacian [ $\nabla^2\rho(r)$ ], potential energy density [ $V(r)$ ], kinetic energy density [ $G(r)$ ], and total electron energy density [ $H(r)$ ].

### Non-covalent interaction (NCI) index

The NCI method<sup>27-29</sup> relies on two scalar fields to map local bonding properties: the electron density ( $\rho$ ) and the reduced-density gradient (RDG,  $s$ ) defined as:

$$s = \frac{1}{2(3\pi)^{1/3}} \frac{|\nabla\rho|}{\rho^{4/3}} \quad (14)$$

The combination of  $s$  and  $\rho$  allows a rough partition of real space into bonding regions: high- $s$  low- $\rho$  region corresponds to non-interacting density tails, low- $s$  high- $\rho$  region to covalent bonds, and low- $s$  low- $\rho$  one to non-covalent interactions. The NCI analysis was carried out at the BLYP-D3(BJ)/def2-SVP level using Multiwfn.<sup>30</sup>

Molecular structures and frontier molecular orbitals were visualized by VMD software<sup>31</sup> and Chemcraft 1.8. program.<sup>32</sup>

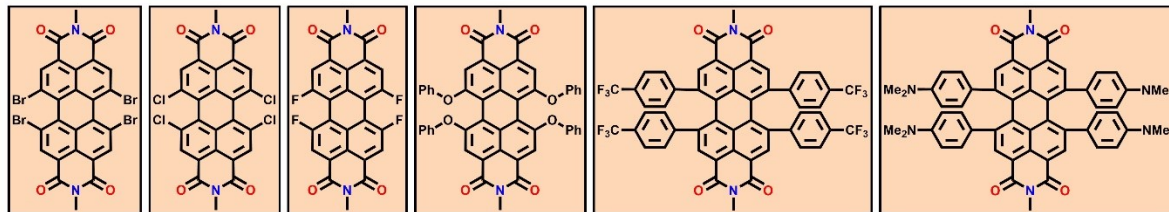

Bay #1

Bay #2

Bay #3

Bay #4

Bay #5

Bay #6

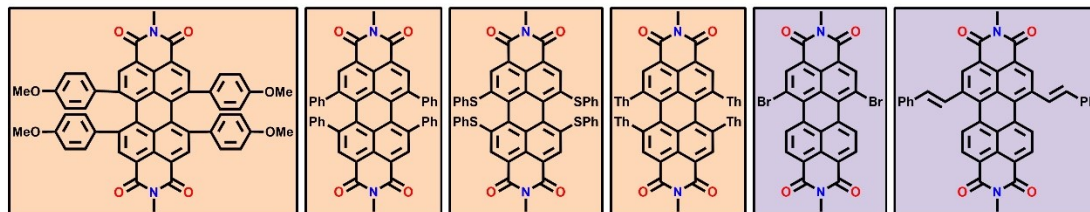

Bay #7

Bay #8

Bay #9

Bay #10

Bay #11

Bay #12

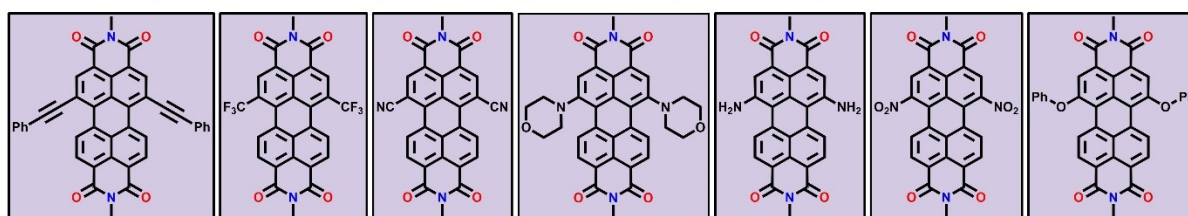

Bay #13

Bay #14

Bay #15

Bay #16

Bay #17

Bay #18

Bay #19

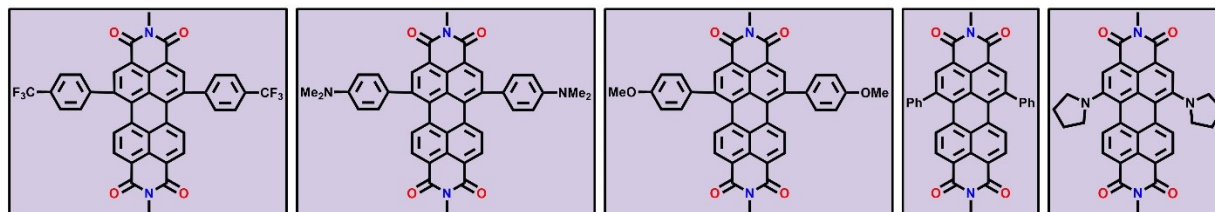

Bay #20

Bay #21

Bay #22

Bay #23

Bay #24

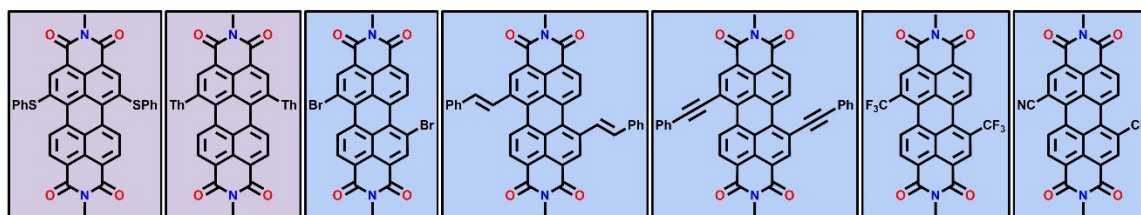

Bay #25

Bay #26

Bay #27

Bay #28

Bay #29

Bay #30

Bay #31

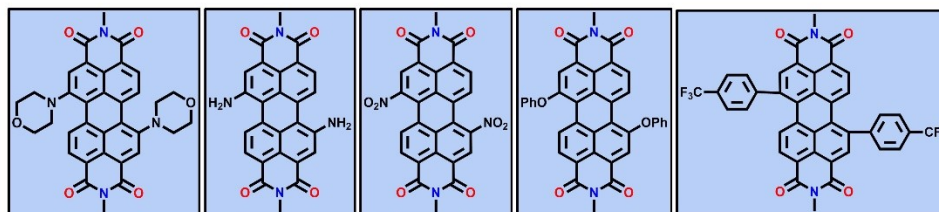

Bay #32

Bay #33

Bay #34

Bay #35

Bay #36



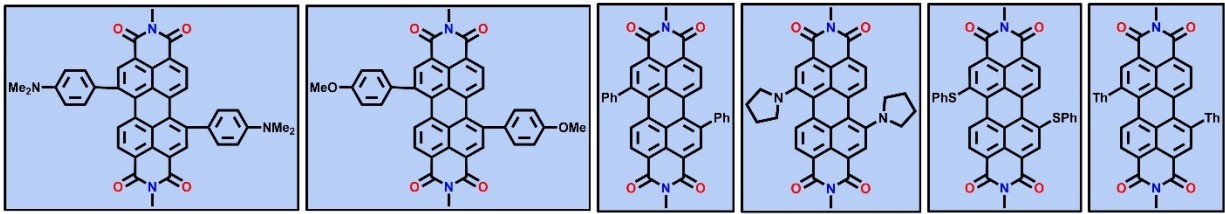

Bay #37 Bay #38 Bay #39 Bay #40 Bay #41 Bay #42

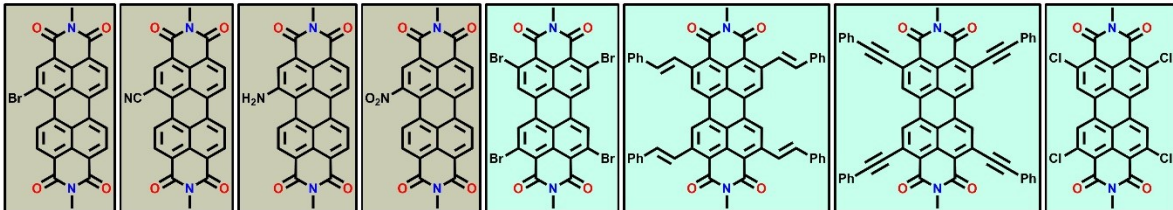

Bay #43 Bay #44 Bay #45 Bay #46 Ortho #1 Ortho #2 Ortho #3 Ortho #4

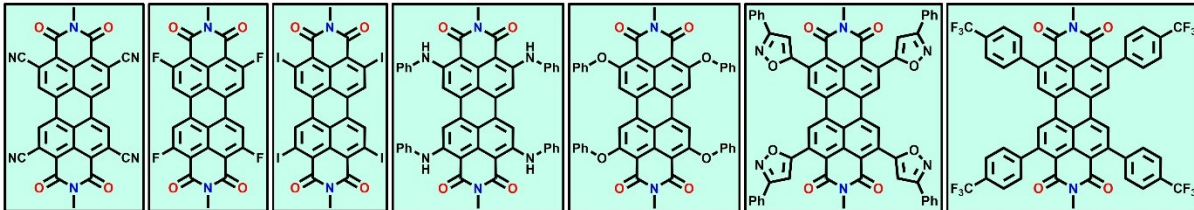

Ortho #5 Ortho #6 Ortho #7 Ortho #8 Ortho #9 Ortho #10 Ortho #11

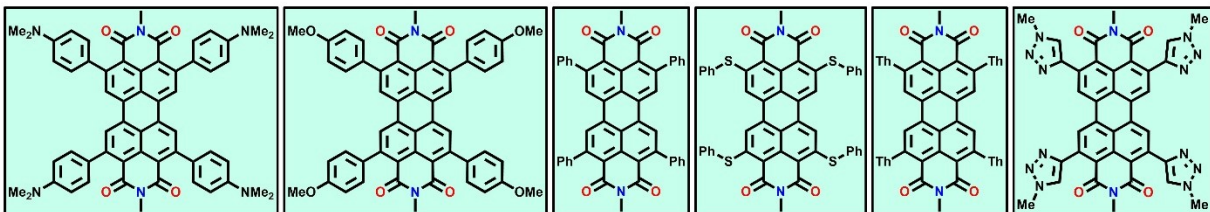

Ortho #12 Ortho #13 Ortho #14 Ortho #15 Ortho #16 Ortho #17

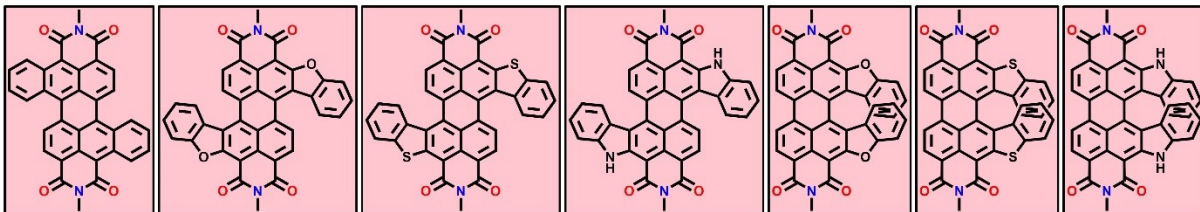

Ext #1 Ext #2 Ext #3 Ext #4 Ext #5 Ext #6 Ext #7

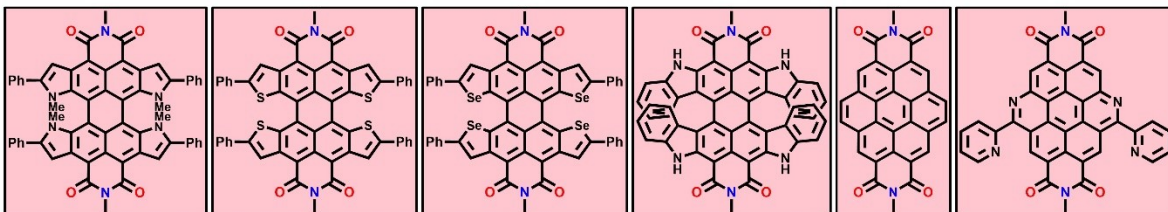

Ext #8 Ext #9 Ext #10 Ext #11 Ext #12 Ext #13



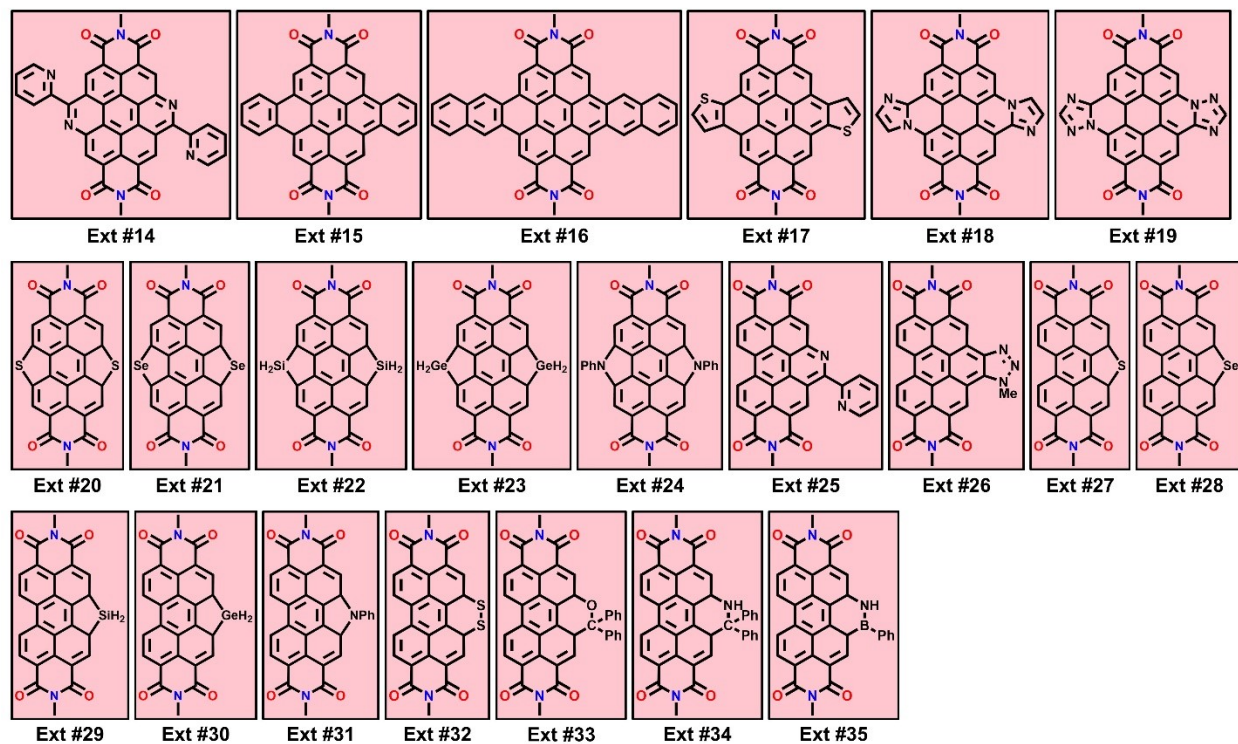

**Figure S1.** Structures of PDI molecules considered in this work. Colors of structures match the colors in Figure 1 in the main text.

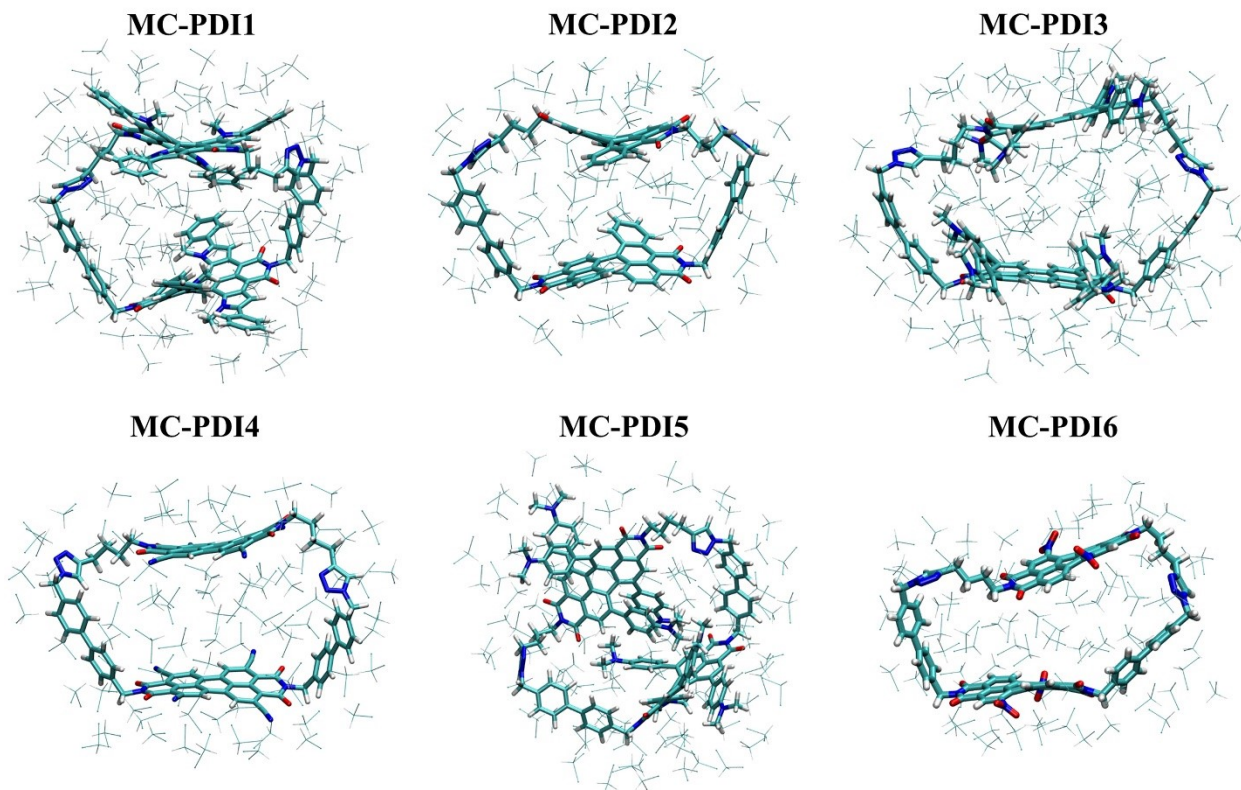

**Figure S2.** Structures of MC-PDI1, MC-PDI2, MC-PDI3, MC-PDI4, MC-PDI5, and MC-PDI6 macrocycles optimized in DCM within QM1/QM2 (BLYP-D3(BJ)/def2-SVP//GFN2-xTB) approach.

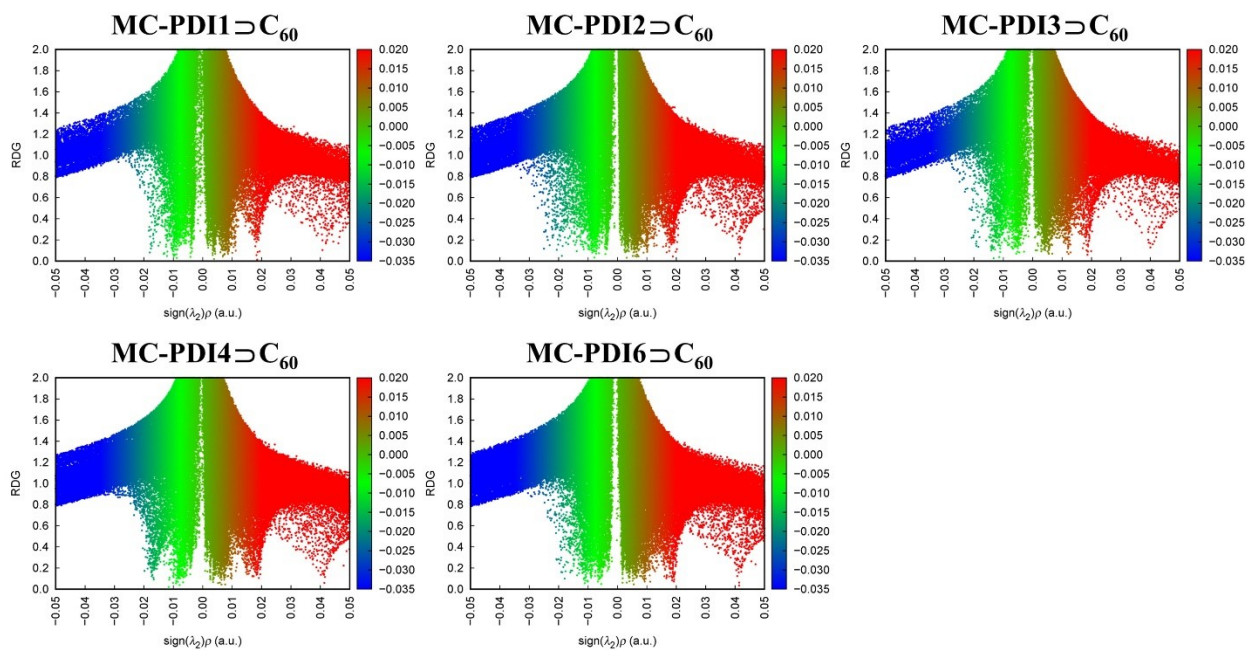

**Figure S3.** Plot of RDG vs.  $\text{sign}(\lambda_2) \times \rho$  for MC-PDI1  $\supset$  C<sub>60</sub>, MC-PDI2  $\supset$  C<sub>60</sub>, MC-PDI3  $\supset$  C<sub>60</sub>, MC-PDI4  $\supset$  C<sub>60</sub>, and MC-PDI6  $\supset$  C<sub>60</sub> complexes.

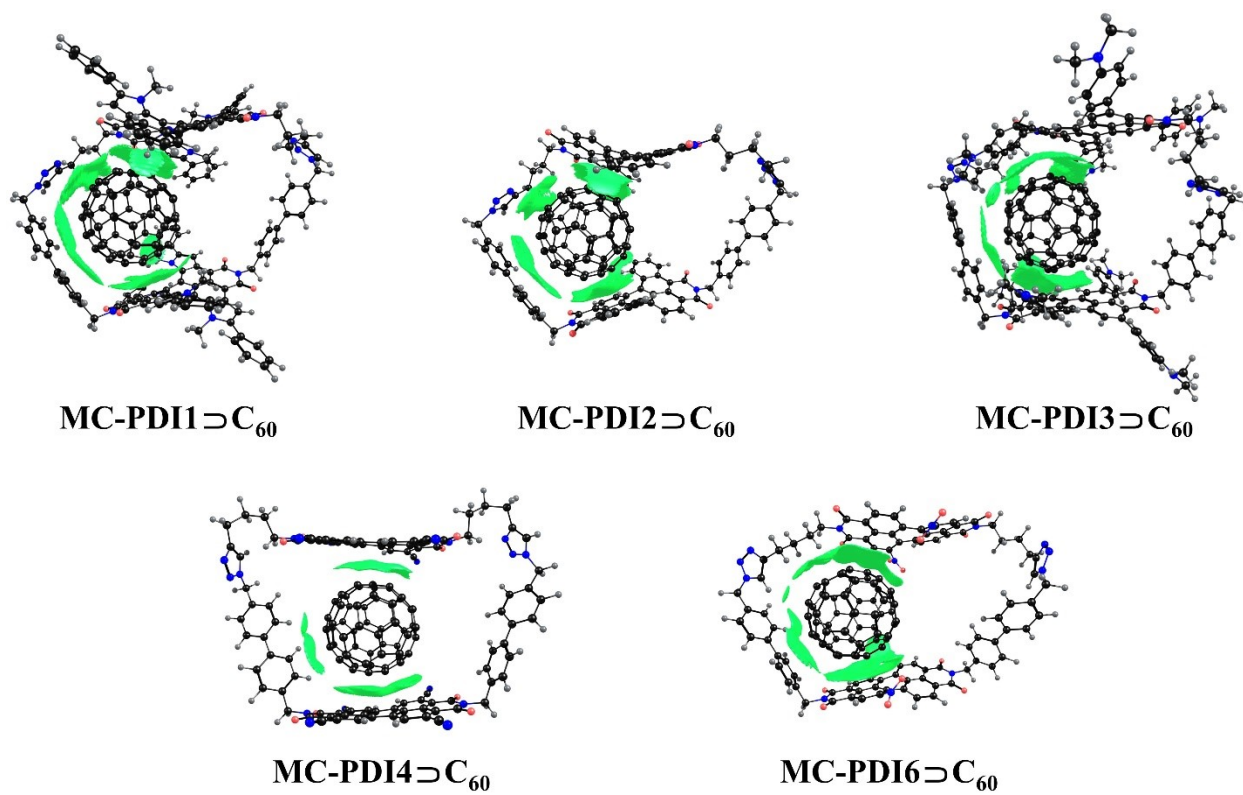

**Figure S4.** NCI isosurfaces of van der Waals interactions for MC-PDI1 $\supset$ C<sub>60</sub>, MC-PDI2 $\supset$ C<sub>60</sub>, MC-PDI3 $\supset$ C<sub>60</sub>, MC-PDI4 $\supset$ C<sub>60</sub>, and MC-PDI6 $\supset$ C<sub>60</sub> complexes.

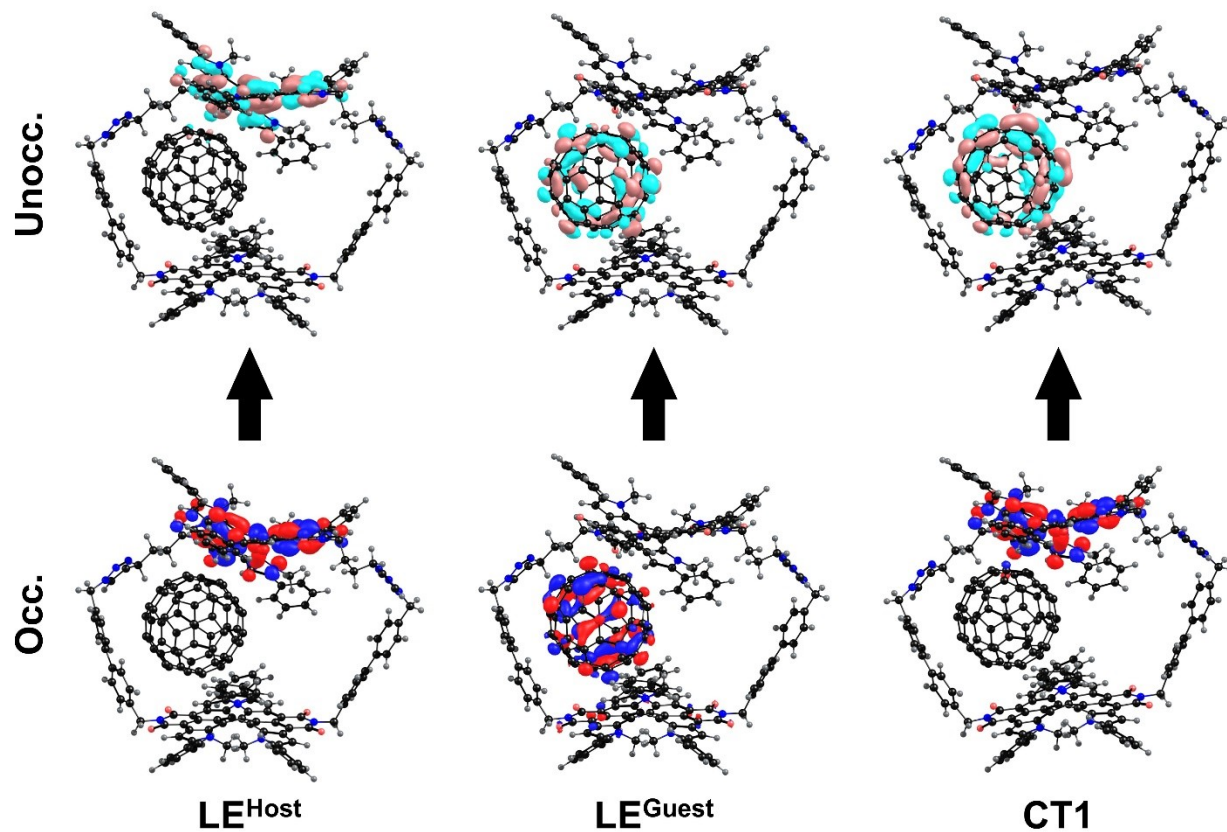

**Figure S5.** Natural transition orbitals representing lowest-lying singlet LE and CT excited states for MC-PDI1@C<sub>60</sub> complex.



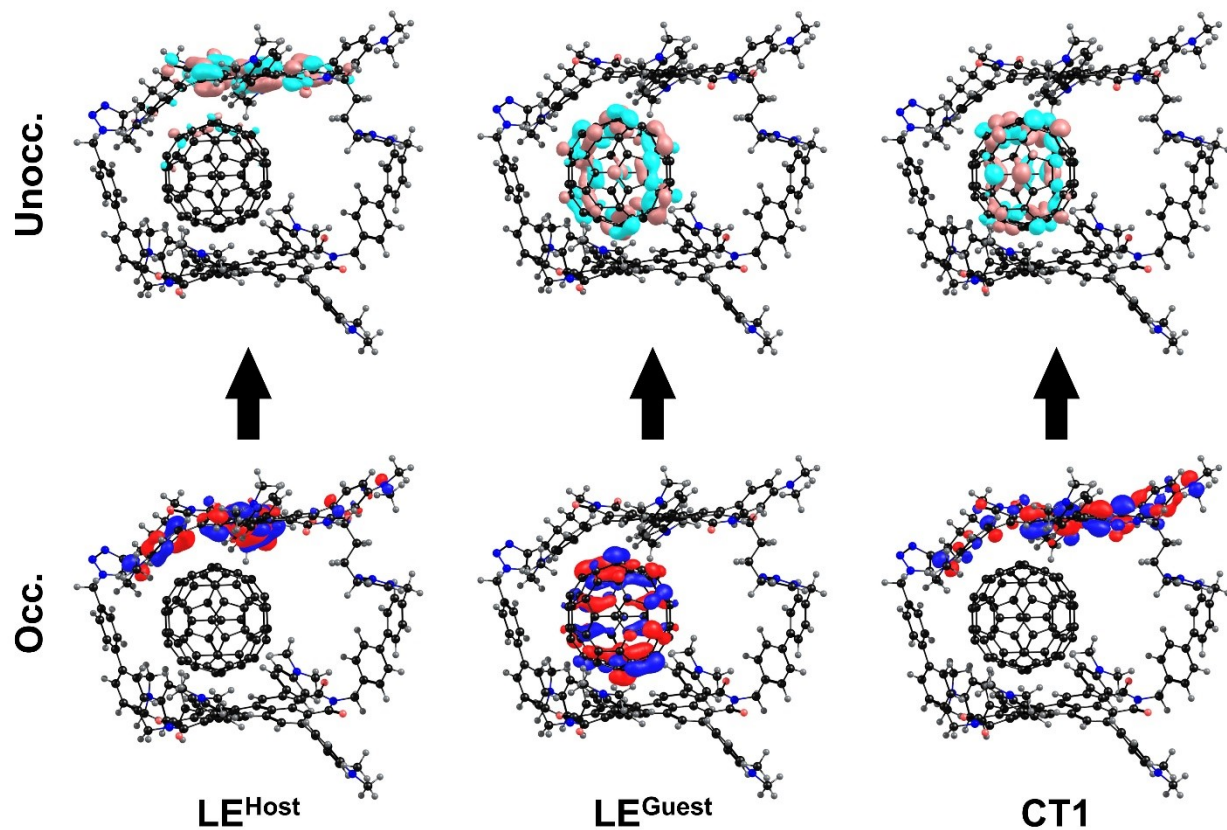

**Figure S6.** Natural transition orbitals representing lowest-lying singlet LE and CT excited states for MC-PDI3@C<sub>60</sub> complex.

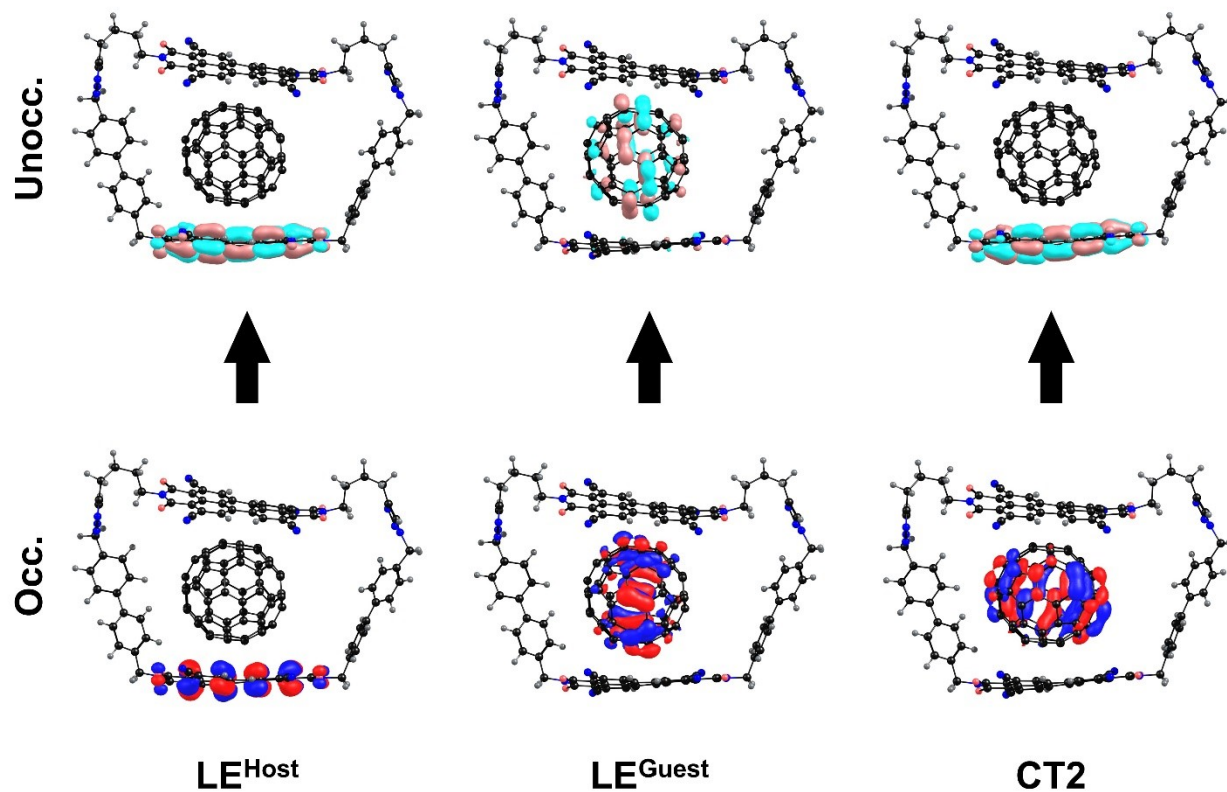

**Figure S7.** Natural transition orbitals representing lowest-lying singlet LE and CT excited states for MC-PDI4@C<sub>60</sub> complex.

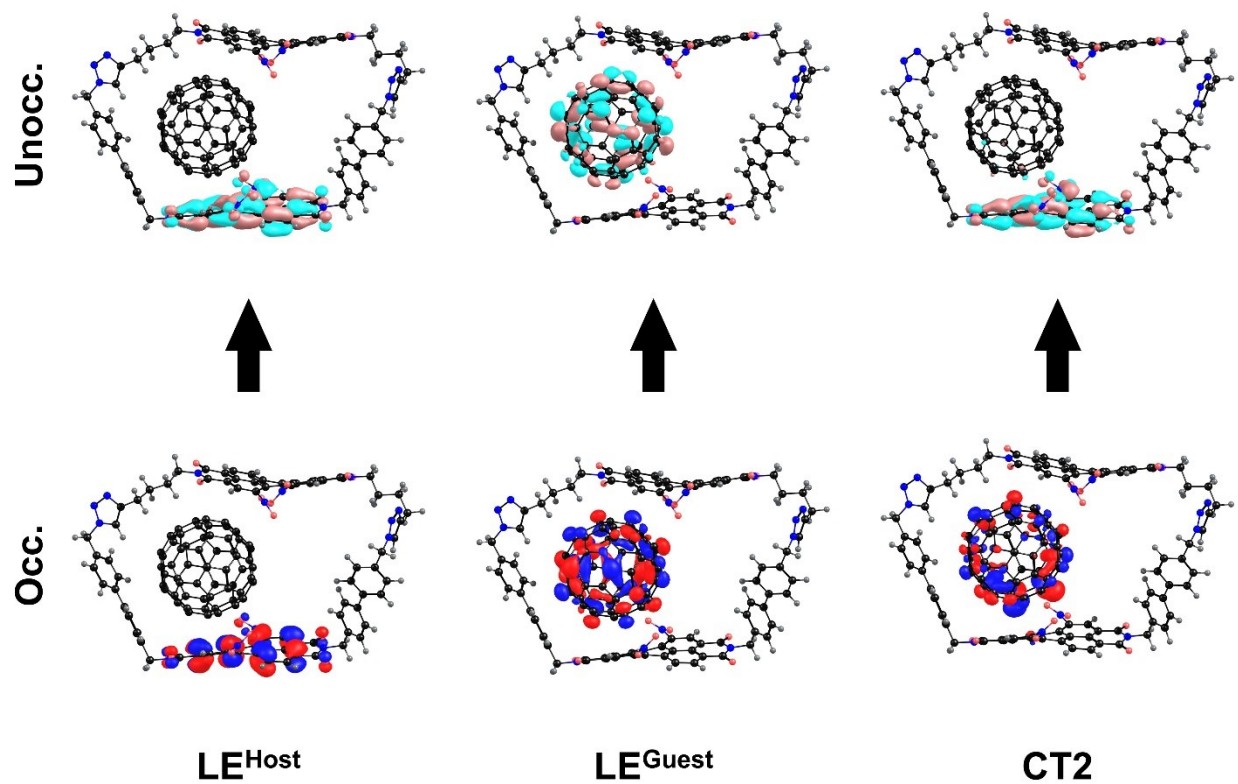

**Figure S8.** Natural transition orbitals representing lowest-lying singlet LE and CT excited states for MC-PDI6 $\supset$ C<sub>60</sub> complex.



**Table S1.** HOMO and LUMO energies, as well as HOMO-LUMO (HL) gap for individual PDIs considered in this work.

| PDI                                   | HOMO   | LUMO   | HL Gap | PDI       | HOMO   | LUMO   | HL Gap |
|---------------------------------------|--------|--------|--------|-----------|--------|--------|--------|
| <b>Bay-substituted PDIs</b>           |        |        |        |           |        |        |        |
| <b>1</b>                              | -7.615 | -3.141 | 4.473  | <b>24</b> | -6.424 | -2.362 | 4.063  |
| <b>2</b>                              | -7.598 | -3.099 | 4.499  | <b>25</b> | -7.013 | -2.632 | 4.381  |
| <b>3</b>                              | -7.532 | -3.014 | 4.517  | <b>26</b> | -7.026 | -2.805 | 4.221  |
| <b>4</b>                              | -6.717 | -2.446 | 4.271  | <b>27</b> | -7.462 | -2.983 | 4.479  |
| <b>5</b>                              | -7.438 | -3.229 | 4.209  | <b>28</b> | -6.813 | -2.776 | 4.038  |
| <b>6</b>                              | -6.036 | -2.226 | 3.810  | <b>29</b> | -6.926 | -2.882 | 4.044  |
| <b>7</b>                              | -6.561 | -2.540 | 4.022  | <b>30</b> | -7.775 | -3.236 | 4.539  |
| <b>8</b>                              | -6.863 | -2.715 | 4.148  | <b>31</b> | -7.884 | -3.470 | 4.414  |
| <b>9</b>                              | -6.907 | -2.785 | 4.123  | <b>32</b> | -6.572 | -2.593 | 3.979  |
| <b>10</b>                             | -6.751 | -2.840 | 3.911  | <b>33</b> | -6.586 | -2.445 | 4.141  |
| <b>11</b>                             | -7.457 | -2.984 | 4.473  | <b>34</b> | -7.966 | -3.526 | 4.440  |
| <b>12</b>                             | -6.894 | -2.768 | 4.125  | <b>35</b> | -6.900 | -2.579 | 4.321  |
| <b>13</b>                             | -6.980 | -2.868 | 4.113  | <b>36</b> | -7.344 | -3.014 | 4.331  |
| <b>14</b>                             | -7.778 | -3.230 | 4.547  | <b>37</b> | -6.365 | -2.455 | 3.910  |
| <b>15</b>                             | -7.873 | -3.459 | 4.414  | <b>38</b> | -6.815 | -2.635 | 4.180  |
| <b>16</b>                             | -6.761 | -2.650 | 4.111  | <b>39</b> | -7.029 | -2.728 | 4.301  |
| <b>17</b>                             | -6.722 | -2.422 | 4.300  | <b>40</b> | -6.262 | -2.283 | 3.979  |
| <b>18</b>                             | -7.948 | -3.524 | 4.424  | <b>41</b> | -6.961 | -2.634 | 4.327  |
| <b>19</b>                             | -6.938 | -2.580 | 4.358  | <b>42</b> | -6.989 | -2.812 | 4.177  |
| <b>20</b>                             | -7.354 | -3.009 | 4.345  | <b>43</b> | -7.377 | -2.913 | 4.464  |
| <b>21</b>                             | -6.430 | -2.456 | 3.974  | <b>44</b> | -7.583 | -3.167 | 4.417  |
| <b>22</b>                             | -6.841 | -2.620 | 4.221  | <b>45</b> | -6.929 | -2.632 | 4.296  |
| <b>23</b>                             | -7.043 | -2.723 | 4.320  | <b>46</b> | -7.627 | -3.189 | 4.437  |
| <b>Ortho-substituted PDIs</b>         |        |        |        |           |        |        |        |
| <b>1</b>                              | -7.786 | -3.164 | 4.622  | <b>10</b> | -7.607 | -3.131 | 4.477  |
| <b>2</b>                              | -7.160 | -2.745 | 4.415  | <b>11</b> | -7.691 | -3.225 | 4.466  |
| <b>3</b>                              | -7.218 | -2.822 | 4.396  | <b>12</b> | -6.340 | -2.242 | 4.097  |
| <b>4</b>                              | -7.803 | -3.156 | 4.647  | <b>13</b> | -6.985 | -2.554 | 4.431  |
| <b>5</b>                              | -8.454 | -3.974 | 4.480  | <b>14</b> | -7.182 | -2.717 | 4.465  |
| <b>6</b>                              | -7.888 | -3.223 | 4.665  | <b>15</b> | -7.211 | -2.614 | 4.597  |
| <b>7</b>                              | -7.714 | -3.128 | 4.586  | <b>16</b> | -7.175 | -2.771 | 4.403  |
| <b>8</b>                              | -6.779 | -2.318 | 4.461  | <b>17</b> | -6.955 | -2.430 | 4.525  |
| <b>9</b>                              | -7.194 | -2.566 | 4.628  |           |        |        |        |
| <b><math>\pi</math>-extended PDIs</b> |        |        |        |           |        |        |        |
| <b>1</b>                              | -6.776 | -3.186 | 3.589  | <b>19</b> | -7.776 | -3.085 | 4.691  |
| <b>2</b>                              | -7.038 | -2.947 | 4.091  | <b>20</b> | -7.607 | -2.862 | 4.745  |
| <b>3</b>                              | -6.940 | -2.974 | 3.966  | <b>21</b> | -7.520 | -2.837 | 4.683  |
| <b>4</b>                              | -6.750 | -2.784 | 3.966  | <b>22</b> | -7.344 | -2.934 | 4.409  |
| <b>5</b>                              | -7.058 | -2.938 | 4.119  | <b>23</b> | -7.279 | -2.878 | 4.401  |

|    |        |        |       |    |        |        |       |
|----|--------|--------|-------|----|--------|--------|-------|
| 6  | -6.958 | -2.957 | 4.001 | 24 | -7.080 | -2.235 | 4.845 |
| 7  | -6.750 | -2.760 | 3.990 | 25 | -7.470 | -2.636 | 4.833 |
| 8  | -6.044 | -2.515 | 3.529 | 26 | -7.462 | -2.800 | 4.662 |
| 9  | -6.661 | -2.878 | 3.783 | 27 | -7.435 | -2.819 | 4.616 |
| 10 | -6.700 | -2.833 | 3.867 | 28 | -7.395 | -2.817 | 4.578 |
| 11 | -6.452 | -2.679 | 3.773 | 29 | -7.312 | -2.893 | 4.418 |
| 12 | -7.579 | -2.415 | 5.164 | 30 | -7.281 | -2.863 | 4.418 |
| 13 | -7.653 | -2.475 | 5.179 | 31 | -7.200 | -2.628 | 4.572 |
| 14 | -7.462 | -2.478 | 4.985 | 32 | -7.304 | -3.094 | 4.210 |
| 15 | -7.214 | -2.528 | 4.686 | 33 | -7.075 | -2.756 | 4.319 |
| 16 | -6.834 | -2.608 | 4.226 | 34 | -6.760 | -2.607 | 4.153 |
| 17 | -7.284 | -2.475 | 4.809 | 35 | -7.181 | -2.676 | 4.505 |
| 18 | -7.344 | -2.892 | 4.452 |    |        |        |       |

**Table S2.** Charge separation (in electrons) between the fragments in electronic ground state for MC-PDI1 $\supset$ C<sub>60</sub>, MC-PDI2 $\supset$ C<sub>60</sub>, MC-PDI3 $\supset$ C<sub>60</sub>, MC-PDI4 $\supset$ C<sub>60</sub>, and MC-PDI6 $\supset$ C<sub>60</sub> complexes. Q<sub>Host</sub> is charge on host (MC-PDI1, MC-PDI2, MC-PDI3, MC-PDI4, and MC-PDI6), and Q<sub>C60</sub> is charge on C<sub>60</sub> fullerene. Total charge of the complexes Q<sub>Tot</sub> = 0.

| Complex                           | Charge Scheme     |                  |                   |                  |                   |                  |
|-----------------------------------|-------------------|------------------|-------------------|------------------|-------------------|------------------|
|                                   | Mulliken          |                  | Löwdin            |                  | CM5               |                  |
|                                   | Q <sub>Host</sub> | Q <sub>C60</sub> | Q <sub>Host</sub> | Q <sub>C60</sub> | Q <sub>Host</sub> | Q <sub>C60</sub> |
| MC-PDI1 $\supset$ C <sub>60</sub> | 0.055             | -0.055           | 0.021             | -0.021           | -0.127            | 0.127            |
| MC-PDI2 $\supset$ C <sub>60</sub> | 0.025             | -0.025           | 0.018             | -0.018           | -0.086            | 0.086            |
| MC-PDI3 $\supset$ C <sub>60</sub> | 0.024             | -0.024           | 0.001             | -0.001           | -0.143            | 0.143            |
| MC-PDI4 $\supset$ C <sub>60</sub> | -0.044            | 0.044            | -0.030            | 0.030            | -0.129            | 0.129            |
| MC-PDI6 $\supset$ C <sub>60</sub> | 0.023             | -0.023           | 0.018             | -0.018           | -0.108            | 0.108            |

**Table S3.** Parameters (electron density [ $\rho(r)$ ], its Laplacian [ $\nabla^2\rho(r)$ ], potential energy density [ $V(r)$ ], kinetic energy density [ $G(r)$ ], and total electron energy density [ $H(r)$ ]) for selected bond critical points related to non-covalent interactions in MC-PDI1 $\supset$ C<sub>60</sub>, MC-PDI2 $\supset$ C<sub>60</sub>, MC-PDI3 $\supset$ C<sub>60</sub>, MC-PDI4 $\supset$ C<sub>60</sub>, and MC-PDI6 $\supset$ C<sub>60</sub> complexes computed in the gas phase.

| Bond critical points between fragments | Interaction    | $\rho(r)$ , a.u.                                 | $\nabla^2\rho(r)$ , a.u. | $V(r)$ , a.u. | $G(r)$ , a.u. | $H(r)$ , a.u. |
|----------------------------------------|----------------|--------------------------------------------------|--------------------------|---------------|---------------|---------------|
|                                        |                | <b>MC-PDI1<math>\supset</math>C<sub>60</sub></b> |                          |               |               |               |
| PDI1 $\cdots$ C <sub>60</sub>          | $\pi\cdots\pi$ | 3.70E-03                                         | 8.68E-03                 | -1.48E-03     | 1.82E-03      | 3.46E-04      |
|                                        |                | 1.08E-02                                         | 3.06E-02                 | -4.77E-03     | 6.21E-03      | 1.44E-03      |
|                                        |                | 9.00E-03                                         | 2.78E-02                 | -3.97E-03     | 5.46E-03      | 1.49E-03      |
|                                        |                | 6.14E-03                                         | 1.73E-02                 | -2.64E-03     | 3.48E-03      | 8.48E-04      |
|                                        | CH $\cdots\pi$ | 6.43E-03                                         | 2.20E-02                 | -2.84E-03     | 4.18E-03      | 1.34E-03      |
|                                        |                | 1.04E-02                                         | 3.47E-02                 | -5.61E-03     | 7.14E-03      | 1.53E-03      |
|                                        |                | 3.08E-03                                         | 9.53E-03                 | -1.17E-03     | 1.78E-03      | 6.04E-04      |
|                                        |                | 6.61E-03                                         | 2.25E-02                 | -2.84E-03     | 4.24E-03      | 1.39E-03      |
|                                        |                | 6.42E-03                                         | 2.34E-02                 | -2.83E-03     | 4.34E-03      | 1.51E-03      |

|                                              |                                              |                                                  |          |           |           |          |
|----------------------------------------------|----------------------------------------------|--------------------------------------------------|----------|-----------|-----------|----------|
| <b>Linker</b> $\cdots$ <b>C<sub>60</sub></b> | $\pi\cdots\pi$                               | 9.96E-03                                         | 3.00E-02 | -4.31E-03 | 5.90E-03  | 1.59E-03 |
|                                              |                                              | 9.60E-03                                         | 2.96E-02 | -4.07E-03 | 5.74E-03  | 1.67E-03 |
|                                              |                                              | 7.67E-03                                         | 2.24E-02 | -3.68E-03 | 4.65E-03  | 9.64E-04 |
|                                              | CH $\cdots\pi$                               | 5.88E-03                                         | 1.81E-02 | -2.56E-03 | 3.55E-03  | 9.88E-04 |
|                                              |                                              | 3.80E-03                                         | 1.13E-02 | -1.56E-03 | 2.19E-03  | 6.26E-04 |
|                                              |                                              | 7.66E-03                                         | 2.51E-02 | -3.65E-03 | 4.97E-03  | 1.32E-03 |
|                                              |                                              | <b>MC-PDI2<math>\supset</math>C<sub>60</sub></b> |          |           |           |          |
| <b>PDI2</b> $\cdots$ <b>C<sub>60</sub></b>   | $\pi\cdots\pi$                               | 8.67E-03                                         | 2.51E-02 | -3.80E-03 | 5.04E-03  | 1.24E-03 |
|                                              |                                              | 7.89E-03                                         | 2.26E-02 | -3.35E-03 | 4.50E-03  | 1.15E-03 |
|                                              |                                              | 9.66E-03                                         | 3.02E-02 | -4.52E-03 | 6.04E-03  | 1.52E-03 |
|                                              |                                              | 9.30E-03                                         | 2.79E-02 | -4.19E-03 | 5.58E-03  | 1.39E-03 |
|                                              |                                              | 8.59E-03                                         | 2.62E-02 | -3.81E-03 | 5.18E-03  | 1.37E-03 |
|                                              |                                              | 8.90E-03                                         | 2.66E-02 | -3.95E-03 | 5.29E-03  | 1.35E-03 |
|                                              |                                              | 7.31E-03                                         | 2.04E-02 | -3.06E-03 | 4.08E-03  | 1.02E-03 |
|                                              |                                              | 9.13E-03                                         | 2.98E-02 | -3.92E-03 | 5.68E-03  | 1.76E-03 |
|                                              |                                              | 7.34E-03                                         | 2.24E-02 | -3.48E-03 | 4.54E-03  | 1.07E-03 |
|                                              | <b>Linker</b> $\cdots$ <b>C<sub>60</sub></b> | $\pi\cdots\pi$                                   | 7.54E-03 | 2.18E-02  | -3.54E-03 | 4.50E-03 |
| 3.67E-03                                     |                                              |                                                  | 8.42E-03 | -1.42E-03 | 1.76E-03  | 3.44E-04 |
| 4.11E-03                                     |                                              |                                                  | 9.12E-03 | -1.56E-03 | 1.92E-03  | 3.60E-04 |
| 1.02E-02                                     |                                              |                                                  | 3.21E-02 | -4.56E-03 | 6.29E-03  | 1.73E-03 |
| CH $\cdots\pi$                               |                                              | 4.15E-03                                         | 1.26E-02 | -1.70E-03 | 2.43E-03  | 7.29E-04 |
|                                              |                                              | 7.15E-03                                         | 2.13E-02 | -3.34E-03 | 4.33E-03  | 9.86E-04 |
|                                              |                                              | <b>MC-PDI3<math>\supset</math>C<sub>60</sub></b> |          |           |           |          |
| <b>PDI3</b> $\cdots$ <b>C<sub>60</sub></b>   | $\pi\cdots\pi$                               | 6.00E-03                                         | 1.48E-02 | -2.40E-03 | 3.05E-03  | 6.52E-04 |
|                                              |                                              | 6.69E-03                                         | 1.76E-02 | -2.68E-03 | 3.53E-03  | 8.57E-04 |
|                                              |                                              | 8.30E-03                                         | 2.45E-02 | -3.61E-03 | 4.87E-03  | 1.26E-03 |
|                                              |                                              | 5.70E-03                                         | 1.52E-02 | -2.40E-03 | 3.10E-03  | 6.95E-04 |
|                                              |                                              | 1.20E-02                                         | 3.67E-02 | -5.78E-03 | 7.47E-03  | 1.70E-03 |
|                                              | CH $\cdots\pi$                               | 1.24E-02                                         | 4.16E-02 | -6.63E-03 | 8.52E-03  | 1.88E-03 |
|                                              |                                              | 2.30E-03                                         | 6.44E-03 | -8.00E-04 | 1.21E-03  | 4.05E-04 |
|                                              |                                              | 8.50E-03                                         | 2.79E-02 | -4.11E-03 | 5.54E-03  | 1.44E-03 |
|                                              |                                              | 7.10E-03                                         | 2.46E-02 | -3.71E-03 | 4.93E-03  | 1.22E-03 |
|                                              |                                              | 5.27E-03                                         | 1.74E-02 | -2.56E-03 | 3.46E-03  | 8.92E-04 |
| <b>Linker</b> $\cdots$ <b>C<sub>60</sub></b> | $\pi\cdots\pi$                               | 4.60E-03                                         | 1.13E-02 | -1.75E-03 | 2.29E-03  | 5.42E-04 |
|                                              |                                              | 4.26E-03                                         | 1.16E-02 | -1.86E-03 | 2.39E-03  | 5.25E-04 |
|                                              |                                              | 5.81E-03                                         | 1.63E-02 | -2.28E-03 | 3.18E-03  | 9.01E-04 |
|                                              | CH $\cdots\pi$                               | 4.90E-03                                         | 1.48E-02 | -2.06E-03 | 2.88E-03  | 8.14E-04 |
|                                              |                                              | 5.81E-03                                         | 1.75E-02 | -2.54E-03 | 3.46E-03  | 9.20E-04 |
|                                              |                                              | 1.01E-02                                         | 2.88E-02 | -5.35E-03 | 6.28E-03  | 9.29E-04 |
|                                              |                                              | <b>MC-PDI4<math>\supset</math>C<sub>60</sub></b> |          |           |           |          |
| <b>PDI4</b> $\cdots$ <b>C<sub>60</sub></b>   | $\pi\cdots\pi$                               | 7.85E-03                                         | 2.31E-02 | -3.34E-03 | 4.55E-03  | 1.21E-03 |
|                                              |                                              | 9.08E-03                                         | 2.64E-02 | -3.92E-03 | 5.25E-03  | 1.34E-03 |
|                                              |                                              | 8.56E-03                                         | 2.57E-02 | -3.72E-03 | 5.07E-03  | 1.35E-03 |
|                                              |                                              | 1.16E-02                                         | 3.71E-02 | -5.87E-03 | 7.57E-03  | 1.71E-03 |
|                                              |                                              | 1.01E-02                                         | 3.10E-02 | -4.74E-03 | 6.25E-03  | 1.51E-03 |
|                                              |                                              | 4.35E-03                                         | 1.04E-02 | -1.75E-03 | 2.18E-03  | 4.29E-04 |

|                                         |                  |                                                  |          |           |          |          |
|-----------------------------------------|------------------|--------------------------------------------------|----------|-----------|----------|----------|
|                                         |                  | 4.05E-03                                         | 1.01E-02 | -1.71E-03 | 2.12E-03 | 4.06E-04 |
| <b>Linker</b> ... <b>C<sub>60</sub></b> | $\pi \cdots \pi$ | 4.05E-03                                         | 1.01E-02 | -1.71E-03 | 2.12E-03 | 4.06E-04 |
|                                         | CH... $\pi$      | 4.47E-03                                         | 1.26E-02 | -1.86E-03 | 2.50E-03 | 6.49E-04 |
|                                         |                  | <b>MC-PDI6<math>\supset</math>C<sub>60</sub></b> |          |           |          |          |
| <b>PDI6</b> ... <b>C<sub>60</sub></b>   | $\pi \cdots \pi$ | 6.49E-03                                         | 2.02E-02 | -3.24E-03 | 4.14E-03 | 9.02E-04 |
|                                         |                  | 7.75E-03                                         | 2.33E-02 | -3.55E-03 | 4.69E-03 | 1.14E-03 |
|                                         |                  | 1.01E-02                                         | 3.05E-02 | -4.45E-03 | 6.04E-03 | 1.59E-03 |
|                                         |                  | 6.00E-03                                         | 1.91E-02 | -3.14E-03 | 3.95E-03 | 8.16E-04 |
|                                         |                  | 9.27E-03                                         | 2.82E-02 | -4.27E-03 | 5.66E-03 | 1.39E-03 |
|                                         |                  | 1.10E-02                                         | 3.46E-02 | -5.30E-03 | 6.98E-03 | 1.68E-03 |
|                                         |                  | 6.61E-03                                         | 2.10E-02 | -3.47E-03 | 4.36E-03 | 8.95E-04 |
|                                         |                  | 1.08E-02                                         | 3.75E-02 | -6.61E-03 | 7.99E-03 | 1.38E-03 |
| <b>Linker</b> ... <b>C<sub>60</sub></b> | $\pi \cdots \pi$ | 6.78E-03                                         | 1.89E-02 | -2.82E-03 | 3.77E-03 | 9.49E-04 |
|                                         |                  | 5.91E-03                                         | 1.90E-02 | -2.43E-03 | 3.59E-03 | 1.16E-03 |
|                                         |                  | 3.52E-03                                         | 1.07E-02 | -1.40E-03 | 2.04E-03 | 6.36E-04 |
|                                         |                  | 5.52E-03                                         | 1.60E-02 | -2.31E-03 | 3.15E-03 | 8.43E-04 |
|                                         |                  | 4.30E-03                                         | 1.32E-02 | -1.75E-03 | 2.52E-03 | 7.73E-04 |
|                                         |                  | 6.23E-03                                         | 1.99E-02 | -3.05E-03 | 4.02E-03 | 9.66E-04 |
|                                         |                  |                                                  |          |           |          |          |

**Table S4.** Excitation energies ( $E_x$ , eV) and dipole moments in the ground state ( $\mu_0$ , D), change in dipole moments between the GS and state of interest ( $\Delta\mu = \mu_i - \mu_0$ , D), as well as solvation energies ( $E_{\text{solv}}$ , eV) in DCM calculated for **MC-PDI1 $\supset$ C<sub>60</sub>**, **MC-PDI2 $\supset$ C<sub>60</sub>**, **MC-PDI3 $\supset$ C<sub>60</sub>**, **MC-PDI4 $\supset$ C<sub>60</sub>**, and **MC-PDI6 $\supset$ C<sub>60</sub>** complexes.

|                   | Host-guest system                                |                                                  |                                                  |                                                  |                                                  |
|-------------------|--------------------------------------------------|--------------------------------------------------|--------------------------------------------------|--------------------------------------------------|--------------------------------------------------|
|                   | <b>MC-PDI1<math>\supset</math>C<sub>60</sub></b> | <b>MC-PDI3<math>\supset</math>C<sub>60</sub></b> | <b>MC-PDI2<math>\supset</math>C<sub>60</sub></b> | <b>MC-PDI4<math>\supset</math>C<sub>60</sub></b> | <b>MC-PDI6<math>\supset</math>C<sub>60</sub></b> |
|                   | Ground state (GS)                                |                                                  |                                                  |                                                  |                                                  |
| $E_x$             | 0.000                                            | 0.000                                            | 0.000                                            | 0.000                                            | 0.000                                            |
| $\mu_0$           | 6.38                                             | 8.13                                             | 6.86                                             | 2.38                                             | 11.44                                            |
| $E_{\text{solv}}$ | -1.906                                           | -2.387                                           | -1.395                                           | -2.591                                           | -1.656                                           |
|                   | LE <sup>Host</sup> (MC-PDI <sub>s</sub> )        |                                                  |                                                  |                                                  |                                                  |
| $E_x$             | 1.761                                            | 2.315                                            | 1.850                                            | 2.500                                            | 2.349                                            |
| $\Delta\mu$       | 1.61                                             | 3.66                                             | 1.31                                             | 3.26                                             | 1.00                                             |
| $E_{\text{solv}}$ | -1.914                                           | -2.449                                           | -1.389                                           | -2.645                                           | -1.675                                           |
|                   | LE <sup>Guest</sup> (C <sub>60</sub> )           |                                                  |                                                  |                                                  |                                                  |
| $E_x$             | 2.524                                            | 2.426                                            | 2.416                                            | 2.427                                            | 2.533                                            |
| $\Delta\mu$       | 0.66                                             | 1.89                                             | 1.68                                             | 1.48                                             | 0.58                                             |
| $E_{\text{solv}}$ | -1.909                                           | -2.403                                           | -1.400                                           | -2.617                                           | -1.638                                           |
|                   | CT1 (MC-PDI $\rightarrow$ C <sub>60</sub> )      |                                                  |                                                  |                                                  |                                                  |
| $E_x$             | 1.679                                            | 2.096                                            | 2.112                                            | n/f <sup>[a]</sup>                               |                                                  |
| $\Delta\mu$       | 28.09                                            | 19.62                                            | 25.39                                            |                                                  |                                                  |
| $E_{\text{solv}}$ | -2.432                                           | -2.918                                           | -1.991                                           |                                                  |                                                  |
|                   | CT2 (C <sub>60</sub> $\rightarrow$ MC-PDI)       |                                                  |                                                  |                                                  |                                                  |

|             |             |        |        |        |
|-------------|-------------|--------|--------|--------|
| $E_x$       | $n/f^{[a]}$ | 2.088  | 1.932  | 2.136  |
| $\Delta\mu$ |             | 26.96  | 25.01  | 22.29  |
| $E_{solv}$  |             | -2.047 | -3.439 | -1.855 |

<sup>[a]</sup> states of interest are not found within the studied range of energies.

## Cartesian coordinates

### MC-PDI1

QM1//QM2: BLYP-D3(BJ)/def2-SVP//GFN2-xTB

Only solute macrocycle shown

| Atom | X           | Y           | Z           |
|------|-------------|-------------|-------------|
| 6    | -1.24755014 | -7.47882519 | 2.83667220  |
| 6    | -3.10129301 | -5.26525107 | 3.13027022  |
| 6    | -0.24181698 | -8.52640035 | 2.68541332  |
| 6    | -1.87473522 | -6.90780399 | 1.68428799  |
| 6    | -2.84810662 | -5.84587953 | 1.83936218  |
| 8    | 0.35544437  | -9.05886042 | 3.64748070  |
| 7    | 0.04983291  | -8.94995891 | 1.37324661  |
| 6    | -1.52678416 | -7.36484114 | 0.37611014  |
| 6    | -3.56800336 | -5.32822998 | 0.70218228  |
| 6    | -0.58171831 | -8.46724333 | 0.20688198  |
| 8    | -0.30215495 | -8.98157319 | -0.89401329 |
| 6    | -3.81591329 | -3.98944901 | 3.16521743  |
| 6    | -4.78816163 | -4.56334205 | 0.96978016  |
| 6    | -4.82041848 | -3.76180644 | 2.16300451  |
| 6    | -5.82977702 | -2.74166144 | 2.35240825  |
| 6    | -5.73027318 | -1.83902315 | 3.45959420  |
| 6    | -6.91036762 | -2.63022360 | 1.42239241  |
| 6    | -6.69574246 | -0.74672999 | 3.61057885  |
| 6    | -7.96842860 | -1.63209269 | 1.63532370  |
| 8    | -6.58283206 | 0.15971677  | 4.46058427  |
| 7    | -7.77734961 | -0.72425699 | 2.70578567  |
| 8    | -8.99447498 | -1.54768022 | 0.93756198  |
| 6    | -5.92485500 | -4.50940326 | 0.13735889  |
| 6    | -6.96760334 | -3.52470679 | 0.32218305  |
| 7    | -6.25571259 | -5.29803025 | -0.96938773 |
| 6    | -7.87937655 | -3.69017130 | -0.77247383 |
| 6    | -7.42829108 | -4.76015230 | -1.55064391 |
| 1    | -8.73238836 | -3.04834810 | -0.98944949 |
| 6    | -3.03530159 | -5.63139231 | -0.57023085 |
| 6    | -2.06121225 | -6.68589426 | -0.75381666 |
| 7    | -3.29993511 | -5.05868510 | -1.82097000 |
| 6    | -1.81930903 | -6.77389261 | -2.15816284 |
| 6    | -2.56478040 | -5.77305178 | -2.78911402 |
| 1    | -1.16808745 | -7.48738168 | -2.65897841 |
| 6    | -2.59683472 | -5.95582589 | 4.25393777  |
| 6    | -1.63322266 | -7.02337008 | 4.12731083  |
| 7    | -2.84044527 | -5.74582888 | 5.61720818  |
| 6    | -1.24649325 | -7.37933587 | 5.46020357  |
| 6    | -1.98437397 | -6.58642755 | 6.35079179  |
| 1    | -0.45496155 | -8.07532703 | 5.73207070  |
| 6    | -3.63815557 | -2.97541351 | 4.12694765  |
| 6    | -4.61309565 | -1.93299500 | 4.33072814  |
| 7    | -2.58990011 | -2.78719061 | 5.03146466  |
| 6    | -4.16265849 | -1.18230582 | 5.46331415  |
| 6    | -2.93210668 | -1.70457677 | 5.87524779  |
| 1    | -4.71144326 | -0.37734245 | 5.94535171  |
| 6    | -2.16171135 | -1.31229405 | 7.06272529  |
| 6    | -1.17306560 | -2.14522917 | 7.65393329  |

### MC-PDI2

QM1//QM2: BLYP-D3(BJ)/def2-SVP//GFN2-xTB

Only solute macrocycle shown

| Atom | X           | Y           | Z           |
|------|-------------|-------------|-------------|
| 6    | -1.60112361 | 6.26445982  | -0.07419456 |
| 6    | -0.42711087 | 6.01829269  | 0.65493622  |
| 6    | -1.88525037 | 5.55992998  | -1.24410456 |
| 6    | 0.52331731  | 5.08304655  | 0.20326206  |
| 1    | -0.23976452 | 6.60167771  | 1.56063675  |
| 6    | -3.10149604 | 5.91578197  | -1.99664207 |
| 6    | -0.97709377 | 4.57173517  | -1.73717110 |
| 6    | 0.28603154  | 4.40727880  | -1.05396829 |
| 8    | -3.83033476 | 6.86492409  | -1.66885304 |
| 7    | -3.38204377 | 5.14354077  | -3.12492827 |
| 6    | -1.29587025 | 3.80635090  | -2.89121336 |
| 6    | 1.30156133  | 3.61243917  | -1.65156583 |
| 6    | -2.58117979 | 4.07507260  | -3.59520375 |
| 6    | -0.37467751 | 2.79132264  | -3.33930164 |
| 6    | 0.93624380  | 2.69068404  | -2.69954966 |
| 8    | -2.98721805 | 3.44263078  | -4.58144260 |
| 6    | 1.77116813  | 4.81401526  | 0.91954349  |
| 6    | 2.67423085  | 3.83903215  | -1.18850240 |
| 6    | 1.95506949  | 5.01746687  | 2.33414967  |
| 6    | 2.87562485  | 4.37721310  | 0.13912690  |
| 6    | 3.80235422  | 3.63661399  | -2.00877094 |
| 6    | 3.30153196  | 5.04939127  | 2.90282188  |
| 6    | 4.21363079  | 4.53824577  | 0.66388137  |
| 6    | 5.09760186  | 3.94058962  | -1.54888043 |
| 6    | 4.43425430  | 4.89095117  | 2.02450461  |
| 6    | 5.31261832  | 4.37479848  | -0.23875700 |
| 6    | 5.84170807  | 5.01884386  | 2.50175775  |
| 6    | 6.68528742  | 4.74427394  | 0.16802911  |
| 8    | 6.16562346  | 5.14031701  | 3.69495397  |
| 7    | 6.86956682  | 5.01820583  | 1.53450087  |
| 8    | 7.62147159  | 4.80882940  | -0.63160529 |
| 1    | 5.96592746  | 3.83220234  | -2.21084182 |
| 1    | -2.32968478 | 7.01190876  | 0.26175701  |
| 6    | 3.41985413  | 5.23692071  | 4.32154872  |
| 6    | 2.30111322  | 5.34145092  | 5.13631823  |
| 1    | 4.42177132  | 5.26928365  | 4.74905689  |
| 1    | 2.42194180  | 5.45490717  | 6.22223436  |
| 6    | 0.83292530  | 5.08933529  | 3.22184600  |
| 6    | 0.99425098  | 5.24233296  | 4.58952457  |
| 1    | -0.17310675 | 4.94038536  | 2.81952319  |
| 1    | 0.11340161  | 5.23214210  | 5.24683154  |
| 6    | 1.80485219  | 1.61848131  | -3.08603395 |
| 6    | 1.46203370  | 0.72370425  | -4.08834496 |
| 1    | 2.73845384  | 1.48396543  | -2.53427524 |
| 1    | 2.13335587  | -0.10399237 | -4.35166247 |
| 6    | -0.67544677 | 1.86014674  | -4.39231480 |
| 6    | 0.21934726  | 0.86473223  | -4.76067939 |
| 1    | -1.64025220 | 1.94529128  | -4.89576034 |

|   |              |             |             |   |             |             |             |
|---|--------------|-------------|-------------|---|-------------|-------------|-------------|
| 6 | -2.48349085  | -0.09843978 | 7.72952677  | 1 | -0.05482141 | 0.16067732  | -5.55777307 |
| 6 | -0.55438927  | -1.78693861 | 8.86475334  | 1 | 3.68205978  | 3.29139685  | -3.04078635 |
| 1 | -0.90466167  | -3.09946041 | 7.19499744  | 6 | 1.57501411  | -6.98125733 | 2.30409113  |
| 6 | -1.88615358  | 0.24192444  | 8.95051465  | 6 | 0.38817212  | -6.41667963 | 2.79175969  |
| 1 | -3.21422720  | 0.58795301  | 7.28986096  | 6 | 1.82975093  | -7.05264534 | 0.93332120  |
| 6 | -0.91252754  | -0.59904011 | 9.52870957  | 6 | -0.57792302 | -5.88363873 | 1.91442401  |
| 1 | 0.19729113   | -2.45855087 | 9.30087809  | 1 | 0.20872876  | -6.42604861 | 3.87038370  |
| 1 | -2.19129994  | 1.17274723  | 9.44906550  | 6 | 3.10106075  | -7.66106704 | 0.49400802  |
| 1 | -0.44686151  | -0.34157192 | 10.48987065 | 6 | 0.86703618  | -6.57591370 | -0.01337374 |
| 6 | -1.80419459  | -6.50598683 | 7.80623063  | 6 | -0.36977849 | -6.01636891 | 0.48909007  |
| 6 | -1.13907388  | -7.56400284 | 8.48775615  | 8 | 3.95957424  | -8.07333777 | 1.28759333  |
| 6 | -2.13461911  | -5.33999385 | 8.54886154  | 7 | 3.30502366  | -7.73207195 | -0.88751032 |
| 6 | -0.77662687  | -7.43257963 | 9.83718193  | 6 | 1.10352470  | -6.69582265 | -1.41148451 |
| 1 | -0.88910364  | -8.48927779 | 7.95277684  | 6 | -1.39080788 | -5.63112942 | -0.42461513 |
| 6 | -1.77859426  | -5.21763412 | 9.90319186  | 6 | 2.39054142  | -7.29039932 | -1.87278474 |
| 1 | -2.62694364  | -4.49453025 | 8.06193840  | 6 | 0.13398539  | -6.17222002 | -2.33952387 |
| 6 | -1.08989339  | -6.25809819 | 10.55411382 | 6 | -1.06577742 | -5.52330530 | -1.82491096 |
| 1 | -0.22532317  | -8.24514528 | 10.33183877 | 8 | 2.72616510  | -7.40803775 | -3.06015926 |
| 1 | -2.02205997  | -4.28421558 | 10.42982187 | 6 | -1.82058786 | -5.27890220 | 2.40015795  |
| 1 | -0.78228425  | -6.17153886 | 11.60493441 | 6 | -2.75132594 | -5.48299787 | 0.10185314  |
| 6 | -2.61986889  | -5.51468361 | -4.23349998 | 6 | -1.98156159 | -4.74313233 | 3.72925898  |
| 6 | -1.53667675  | -5.94286772 | -5.05401502 | 6 | -2.94047440 | -5.28419609 | 1.52334399  |
| 6 | -3.74151848  | -4.92171743 | -4.86797034 | 6 | -3.89618592 | -5.60186333 | -0.71031310 |
| 6 | -1.56899952  | -5.75869583 | -6.44382962 | 6 | -3.31843395 | -4.56412696 | 4.28220864  |
| 1 | -0.65189627  | -6.40649125 | -4.59532524 | 6 | -4.27289851 | -5.12096545 | 2.06874477  |
| 6 | -3.77829684  | -4.76159427 | -6.26350717 | 6 | -5.18915234 | -5.51639249 | -0.17168304 |
| 1 | -4.60924769  | -4.60574317 | -4.28191667 | 6 | -4.46614340 | -4.83121091 | 3.44836518  |
| 6 | -2.68871928  | -5.16445405 | -7.05876587 | 6 | -5.39279773 | -5.28546971 | 1.18963497  |
| 1 | -0.70650593  | -6.07840803 | -7.04372061 | 6 | -5.85695163 | -4.73514537 | 3.97455041  |
| 1 | -4.67669470  | -4.32375599 | -6.72188008 | 6 | -6.77657439 | -5.21919661 | 1.69839550  |
| 1 | -2.70296417  | -5.01106410 | -8.14671226 | 8 | -6.14615732 | -4.46655447 | 5.14993885  |
| 6 | -7.94685808  | -5.20646310 | -2.85040108 | 7 | -6.91894554 | -4.94653676 | 3.06178212  |
| 6 | -9.28795316  | -4.91713778 | -3.21974936 | 8 | -7.77461960 | -5.38997117 | 0.98353406  |
| 6 | -7.10421118  | -5.82070065 | -3.81444216 | 1 | -6.05551760 | -5.61416550 | -0.83384525 |
| 6 | -9.76132338  | -5.22110048 | -4.50543255 | 1 | 2.33561522  | -7.36359865 | 2.99476381  |
| 1 | -9.96382963  | -4.44397149 | -2.49638963 | 6 | -3.41841591 | -4.10371994 | 5.64108107  |
| 6 | -7.57542084  | -6.11602480 | -5.10314593 | 6 | -2.29431768 | -3.76613887 | 6.38235626  |
| 1 | -6.06075142  | -6.04202056 | -3.57373955 | 1 | -4.41642342 | -4.00420906 | 6.06869437  |
| 6 | -8.90748171  | -5.82382085 | -5.45528091 | 1 | -2.41042563 | -3.40368484 | 7.41351140  |
| 1 | -10.79914126 | -4.97753457 | -4.77238563 | 6 | -0.85437132 | -4.32049510 | 4.50672299  |
| 1 | -6.88565736  | -6.55672800 | -5.83646400 | 6 | -0.99794681 | -3.84375477 | 5.80273703  |
| 1 | -9.27605807  | -6.05444661 | -6.46381273 | 1 | 0.13865668  | -4.33139599 | 4.04661760  |
| 6 | -3.78299371  | -3.67773176 | -1.99759275 | 1 | -0.11829695 | -3.50025096 | 6.36529136  |
| 1 | -3.14698644  | -3.16084716 | -2.73816576 | 6 | -1.88467047 | -4.77977809 | -2.73701859 |
| 1 | -4.83423544  | -3.63125471 | -2.33195699 | 6 | -1.67249374 | -4.82503855 | -4.10628812 |
| 1 | -3.70031187  | -3.14091609 | -1.03781535 | 1 | -2.67668790 | -4.13509371 | -2.34063660 |
| 6 | -5.86488816  | -6.71656808 | -1.09025579 | 1 | -2.31509679 | -4.23656486 | -4.77547701 |
| 1 | -5.05641887  | -6.87833047 | -1.82310118 | 6 | 0.26916545  | -6.25709822 | -3.76557263 |
| 1 | -5.52951907  | -7.08270418 | -0.10405708 | 6 | -0.62701853 | -5.63785585 | -4.62381156 |
| 1 | -6.74360074  | -7.30912538 | -1.39891769 | 1 | 1.11287660  | -6.82206898 | -4.16206896 |
| 6 | -1.21346150  | -3.20823675 | 4.72238676  | 1 | -0.50150621 | -5.75499684 | -5.71048385 |
| 1 | -1.16301883  | -3.48728667 | 3.65746804  | 1 | -3.79829066 | -5.78545455 | -1.78334693 |
| 1 | -0.53091856  | -2.35637712 | 4.88127190  | 6 | -4.60478298 | 5.47090264  | -3.89283737 |
| 1 | -0.87929478  | -4.07168303 | 5.32243944  | 1 | -4.39912246 | 5.25347838  | -4.95378107 |
| 6 | -4.11024974  | -5.21222712 | 6.13585317  | 1 | -4.77077066 | 6.55454890  | -3.77798666 |
| 1 | -4.50749984  | -5.90071603 | 6.90219080  | 6 | -8.30795719 | -4.79967928 | 3.57196385  |



|   |             |             |             |   |              |             |             |
|---|-------------|-------------|-------------|---|--------------|-------------|-------------|
| 1 | -4.00227932 | -4.20132828 | 6.56114944  | 1 | -8.25845764  | -4.96988079 | 4.65936569  |
| 1 | -4.83568307 | -5.15850252 | 5.30961046  | 1 | -8.92180601  | -5.58425534 | 3.09966575  |
| 6 | 6.43354438  | 3.65007214  | 1.14455117  | 7 | -8.46294103  | 5.52615218  | -1.58657602 |
| 6 | 4.36536968  | 4.25542785  | -0.79242416 | 7 | -9.23347848  | 5.56758573  | -0.50586642 |
| 6 | 7.46227712  | 3.18132188  | 2.07491823  | 1 | -8.92693591  | 3.72414313  | 1.66682804  |
| 6 | 5.07512823  | 3.76815970  | 1.56798129  | 6 | -8.97170440  | 4.61974246  | -2.48085285 |
| 6 | 4.05094439  | 4.13130306  | 0.60827270  | 1 | -8.29109260  | 1.51525385  | 2.57222696  |
| 8 | 8.63873293  | 2.96422217  | 1.72207364  | 6 | -9.65410785  | 2.90308850  | 1.64618585  |
| 7 | 7.07472406  | 2.94828832  | 3.40823404  | 7 | -10.24938772 | 4.69570629  | -0.69961680 |
| 6 | 4.73559831  | 3.54034418  | 2.93993043  | 6 | -9.29867292  | 1.65120656  | 2.15962832  |
| 6 | 2.69914688  | 4.38515755  | 1.03298874  | 1 | -11.16668829 | 5.28579669  | 1.06305131  |
| 6 | 5.77308315  | 3.17177803  | 3.91846652  | 1 | -11.11253835 | -1.85660298 | 1.18645518  |
| 8 | 5.54935539  | 3.01566681  | 5.13380061  | 6 | -11.22542135 | 4.42771453  | 0.36780899  |
| 6 | 3.24651486  | 4.27895200  | -1.73476227 | 6 | -10.12432222 | 4.07149371  | -1.90569261 |
| 6 | 1.82373278  | 5.11182373  | 0.10738773  | 1 | -10.32687811 | -4.13984660 | 1.83698322  |
| 6 | 2.02288776  | 4.90096237  | -1.30225444 | 6 | -10.33873586 | -1.96469110 | 1.95727988  |
| 6 | 1.02690245  | 5.32118294  | -2.27087520 | 6 | -10.91709095 | 3.10633447  | 1.05042213  |
| 6 | 1.20525539  | 5.01340035  | -3.65585359 | 6 | -9.88919628  | -3.24916711 | 2.31021470  |
| 6 | -0.12630484 | 6.05369471  | -1.84475817 | 6 | -10.19536990 | 0.55480830  | 2.10149894  |
| 6 | 0.25358297  | 5.51478948  | -4.65397371 | 6 | -9.76671279  | -0.80257724 | 2.53395227  |
| 6 | -1.16874027 | 6.44994496  | -2.81553623 | 1 | -12.23638481 | 4.42222356  | -0.07907001 |
| 8 | 0.42944236  | 5.39081381  | -5.88082269 | 6 | -8.85343068  | -3.41993086 | 3.25068274  |
| 7 | -0.90924934 | 6.15154861  | -4.17816755 | 6 | -11.83668981 | 2.04070637  | 1.03562021  |
| 8 | -2.21288456 | 7.03937640  | -2.49331453 | 6 | -11.48405287 | 0.78758834  | 1.56178118  |
| 6 | 0.79455635  | 6.01212472  | 0.46762955  | 6 | -8.73758961  | -0.98704344 | 3.49361478  |
| 6 | -0.21607024 | 6.44646287  | -0.47817829 | 6 | -8.29099697  | -2.26846059 | 3.84490762  |
| 7 | 0.54112816  | 6.64149925  | 1.69148797  | 1 | -12.83205622 | 2.18885221  | 0.59107000  |
| 6 | -1.12411772 | 7.28771484  | 0.25408886  | 1 | -8.28431361  | -0.11515198 | 3.98273357  |
| 6 | -0.63187879 | 7.41236269  | 1.55931870  | 1 | -12.22583838 | -0.02169667 | 1.54642782  |
| 1 | -2.02370754 | 7.76050638  | -0.14445713 | 1 | -7.48945636  | -2.38378118 | 4.58426556  |
| 6 | 2.36314432  | 3.97576862  | 2.34208506  | 6 | -5.83798927  | 4.69157858  | -3.41246983 |
| 6 | 3.36921695  | 3.62618416  | 3.32352906  | 6 | -8.36993226  | 4.31868876  | -3.82934918 |
| 7 | 1.10876114  | 3.89241357  | 2.95588401  | 6 | -7.09851494  | 5.10874690  | -4.18859108 |
| 6 | 2.67682916  | 3.43564641  | 4.56234420  | 1 | -9.14129931  | 4.50313314  | -4.60574220 |
| 6 | 1.30650610  | 3.59434818  | 4.32148582  | 1 | -8.16711795  | 3.22800354  | -3.87787213 |
| 1 | 3.14420888  | 3.22040780  | 5.52321202  | 1 | -5.98130789  | 4.87624745  | -2.33402768 |
| 6 | 5.73357285  | 4.32872687  | -1.13675213 | 1 | -5.65764689  | 3.60340134  | -3.53241809 |
| 6 | 6.77696824  | 3.99975674  | -0.18809902 | 1 | -7.29410363  | 6.19145002  | -4.04531310 |
| 7 | 6.34425077  | 4.66679290  | -2.35206824 | 1 | -6.91687706  | 4.97486941  | -5.27449410 |
| 6 | 8.01776041  | 4.10174397  | -0.89435592 | 1 | -10.82762083 | 3.30902992  | -2.24926124 |
| 6 | 7.73630205  | 4.49306456  | -2.20476419 | 6 | 8.24835915   | 5.31741929  | 1.98900143  |
| 1 | 9.00909605  | 3.89632438  | -0.49372875 | 1 | 8.75463594   | 5.79612813  | 1.13404889  |
| 6 | 3.27299538  | 3.78949129  | -3.05831267 | 1 | 8.16660456   | 6.04621071  | 2.81151524  |
| 6 | 2.29717805  | 4.19431982  | -4.04507606 | 6 | 4.60307397   | -8.28374676 | -1.35784404 |
| 7 | 4.16049639  | 2.89678369  | -3.66084830 | 1 | 4.41251053   | -8.86669924 | -2.27212789 |
| 6 | 2.68584619  | 3.57356235  | -5.27755804 | 1 | 4.94771017   | -8.95456235 | -0.55488870 |
| 6 | 3.80660291  | 2.77318693  | -5.02224466 | 7 | 9.45412265   | 2.66280903  | -2.01212957 |
| 1 | 2.19432737  | 3.71949013  | -6.23921318 | 7 | 9.62199493   | 1.65775658  | -2.85316615 |
| 6 | 4.55021070  | 1.94571803  | -5.98588079 | 1 | 9.08979867   | -1.50561737 | -4.75504730 |
| 6 | 3.89007055  | 1.46897679  | -7.15289270 | 1 | 7.54125037   | -3.40962535 | -4.32754870 |
| 6 | 5.93180799  | 1.64061360  | -5.83223323 | 6 | 10.23908427  | 2.47324694  | -0.90012419 |
| 6 | 4.57946441  | 0.72010718  | -8.11989690 | 6 | 9.10569654   | -2.01430000 | -3.77911916 |
| 1 | 2.82390306  | 1.67826331  | -7.30518766 | 6 | 8.25332471   | -3.10956821 | -3.54832220 |
| 6 | 6.61795252  | 0.89742037  | -6.80644028 | 1 | 7.30735485   | -5.62869316 | -4.16364463 |
| 1 | 6.48546198  | 2.00652425  | -4.96186728 | 7 | 10.52396351  | 0.80846376  | -2.30322964 |
| 6 | 5.94876897  | 0.43305725  | -7.95449580 | 1 | 5.74847078   | -7.50786046 | -3.75331976 |

|   |             |              |             |   |             |             |             |
|---|-------------|--------------|-------------|---|-------------|-------------|-------------|
| 1 | 4.03135684  | 0.35493753   | -9.00018038 | 1 | 10.98298673 | -0.15741295 | -4.09466249 |
| 1 | 7.68864296  | 0.69332354   | -6.67646024 | 6 | 6.95587126  | -5.81366924 | -3.13950962 |
| 1 | 6.49226848  | -0.13565489  | -8.72157152 | 6 | 6.07875660  | -6.88800414 | -2.90840425 |
| 6 | 8.68881254  | 4.56788857   | -3.31970717 | 6 | 10.93395658 | -0.40897831 | -3.01982615 |
| 6 | 10.06450704 | 4.79895796   | -3.05403686 | 6 | 10.92866278 | 1.26731878  | -1.08019226 |
| 6 | 8.30310496  | 4.27520932   | -4.65518533 | 6 | 9.99706066  | -1.57718667 | -2.77833662 |
| 6 | 11.01905004 | 4.70708721   | -4.07817456 | 6 | 8.26764789  | -3.80703542 | -2.31366470 |
| 1 | 10.37714126 | 5.05978120   | -2.03371958 | 6 | 7.38162718  | -4.97777758 | -2.07836700 |
| 6 | 9.26168985  | 4.19121937   | -5.68218463 | 6 | 5.61634395  | -7.18062028 | -1.61068658 |
| 1 | 7.25200796  | 4.07248722   | -4.88768810 | 1 | 11.95822243 | -0.65079648 | -2.68135772 |
| 6 | 10.62448393 | 4.40475557   | -5.39724918 | 1 | 11.64545447 | 0.72441735  | -0.46013630 |
| 1 | 12.08252601 | 4.86498482   | -3.84748140 | 6 | 10.00500053 | -2.25153680 | -1.53674024 |
| 1 | 8.94440477  | 3.95068278   | -6.70827882 | 6 | 6.93480611  | -5.29378034 | -0.76988828 |
| 1 | 11.37458389 | 4.32580248   | -6.19622102 | 6 | 9.15780015  | -3.34865327 | -1.30865458 |
| 6 | 0.22548029  | 3.54628362   | 5.31214104  | 6 | 6.08184407  | -6.38323737 | -0.53852837 |
| 6 | 0.46146476  | 2.89777177   | 6.55330310  | 1 | 10.69641194 | -1.93110666 | -0.74238890 |
| 6 | -1.02315482 | 4.19698182   | 5.12964639  | 1 | 7.23950833  | -4.65637221 | 0.07176187  |
| 6 | -0.51328516 | 2.88201687   | 7.55622467  | 1 | 5.75415928  | -6.62651792 | 0.48241569  |
| 1 | 1.42516785  | 2.40522443   | 6.73014184  | 1 | 9.21686321  | -3.86857922 | -0.34383281 |
| 6 | -2.00176246 | 4.17845106   | 6.13989589  | 6 | 9.27380287  | 2.99837069  | 1.39128521  |
| 1 | -1.22825939 | 4.74767220   | 4.20675260  | 6 | 10.24111126 | 3.43062974  | 0.25852163  |
| 6 | -1.75965101 | 3.50939559   | 7.35581884  | 6 | 9.03292863  | 4.07646804  | 2.46545496  |
| 1 | -0.29918338 | 2.36946243   | 8.50043133  | 1 | 8.30102049  | 2.70525607  | 0.94921255  |
| 1 | -2.95025588 | 4.71367275   | 5.98618007  | 1 | 9.67722616  | 2.08982138  | 1.88779350  |
| 1 | -2.52699943 | 3.48867879   | 8.14348593  | 1 | 10.00805754 | 4.43766589  | 2.85782326  |
| 6 | -1.18583997 | 8.21591426   | 2.66112589  | 1 | 8.49762833  | 3.61767738  | 3.32014642  |
| 6 | -1.94545777 | 9.38175873   | 2.36593384  | 1 | 9.93813207  | 4.42081655  | -0.12652463 |
| 6 | -1.01471329 | 7.85382917   | 4.02612064  | 1 | 11.26563637 | 3.52345649  | 0.67363748  |
| 6 | -2.49314795 | 10.15991308  | 3.40002187  |   |             |             |             |
| 1 | -2.08203342 | 9.68676902   | 1.32082291  |   |             |             |             |
| 6 | -1.56313090 | 8.63623786   | 5.05437214  |   |             |             |             |
| 1 | -0.46981210 | 6.94409287   | 4.29418784  |   |             |             |             |
| 6 | -2.30107322 | 9.79582343   | 4.74898164  |   |             |             |             |
| 1 | -3.06794676 | 11.06424094  | 3.16107535  |   |             |             |             |
| 1 | -1.42827159 | 8.32630436   | 6.09889299  |   |             |             |             |
| 1 | -2.73348163 | 10.41074264  | 5.55161779  |   |             |             |             |
| 6 | -0.12691282 | 3.60223079   | 2.21050712  |   |             |             |             |
| 1 | -0.67743391 | 2.78968258   | 2.71715185  |   |             |             |             |
| 1 | -0.78313475 | 4.48586449   | 2.12161919  |   |             |             |             |
| 1 | 0.14578007  | 3.25973546   | 1.19849629  |   |             |             |             |
| 6 | 1.57877861  | 6.91049545   | 2.70065748  |   |             |             |             |
| 1 | 2.56687928  | 6.69126792   | 2.26995731  |   |             |             |             |
| 1 | 1.55454908  | 7.97931081   | 2.96636364  |   |             |             |             |
| 1 | 1.44170838  | 6.31310648   | 3.61686385  |   |             |             |             |
| 6 | 4.93411095  | 1.90580397   | -2.89935161 |   |             |             |             |
| 1 | 4.45151408  | 1.75307480   | -1.91837627 |   |             |             |             |
| 1 | 4.93006819  | 0.94877881   | -3.44373765 |   |             |             |             |
| 1 | 5.97960931  | 2.21649293   | -2.73795946 |   |             |             |             |
| 6 | 5.74744561  | 5.58665151   | -3.33661287 |   |             |             |             |
| 1 | 5.37874076  | 5.07555453   | -4.24169329 |   |             |             |             |
| 1 | 4.89810555  | 6.11043625   | -2.86992662 |   |             |             |             |
| 1 | 6.49648077  | 6.34351007   | -3.62971448 |   |             |             |             |
| 6 | 8.10803745  | 2.42801110   | 4.33256073  |   |             |             |             |
| 1 | 7.88788150  | 2.83247935   | 5.33101270  |   |             |             |             |
| 6 | 1.11709736  | -9.96508684  | 1.19220940  |   |             |             |             |
| 1 | 0.82290500  | -10.60575084 | 0.34599233  |   |             |             |             |

|   |             |              |             |
|---|-------------|--------------|-------------|
| 7 | 8.13388362  | -1.80992911  | 0.78761853  |
| 7 | 8.45757132  | -2.67914486  | -0.15924988 |
| 1 | 7.70711516  | -5.19346314  | -2.13443387 |
| 1 | 5.65344848  | -6.51453116  | -1.79919490 |
| 6 | 8.86292150  | -2.07161000  | 1.92524757  |
| 6 | 7.58168244  | -5.76044474  | -1.20344082 |
| 6 | 6.41160088  | -6.50789740  | -1.00459897 |
| 1 | 4.70307734  | -8.66238874  | -1.59835559 |
| 7 | 9.40649107  | -3.49460463  | 0.34710278  |
| 1 | 2.55053065  | -9.84272480  | -1.17134435 |
| 1 | 9.94291096  | -4.49873605  | -1.41666738 |
| 6 | 4.25874425  | -8.63545569  | -0.59224786 |
| 6 | 3.04735120  | -9.30705831  | -0.35178766 |
| 6 | 9.74470888  | -4.74473386  | -0.35819381 |
| 6 | 9.69309109  | -3.15950586  | 1.64200519  |
| 6 | 8.57655390  | -5.70224127  | -0.20847797 |
| 6 | 6.19699543  | -7.21092406  | 0.20633279  |
| 6 | 4.92778978  | -7.94578482  | 0.45074001  |
| 6 | 2.46392656  | -9.30514057  | 0.93271165  |
| 1 | 10.67439158 | -5.13811402  | 0.09104008  |
| 1 | 10.42708832 | -3.71027474  | 2.23268784  |
| 6 | 8.38554056  | -6.42098126  | 0.99033756  |
| 6 | 4.34093391  | -7.95432903  | 1.74038177  |
| 6 | 7.21400418  | -7.16684360  | 1.19509591  |
| 6 | 3.13019357  | -8.61768999  | 1.97408575  |
| 1 | 9.16157250  | -6.38076352  | 1.76843562  |
| 1 | 4.82986707  | -7.41567600  | 2.56416287  |
| 1 | 2.67300323  | -8.58720450  | 2.96937522  |
| 1 | 7.07964109  | -7.73222161  | 2.12647846  |
| 6 | 8.46359159  | 0.19179541   | 3.05595520  |
| 6 | 8.64888920  | -1.32934947  | 3.21756896  |
| 6 | 8.15127947  | 0.88815641   | 4.39098255  |
| 1 | 9.36794745  | 0.64228794   | 2.60357808  |
| 1 | 7.63607506  | 0.37333161   | 2.34317436  |
| 1 | 8.91835712  | 0.61278469   | 5.14441862  |
| 1 | 7.18553817  | 0.50819897   | 4.78698624  |
| 1 | 9.48636545  | -1.55408554  | 3.90837252  |
| 1 | 7.74882291  | -1.75373744  | 3.71543277  |
| 1 | 9.07911290  | 2.83123236   | 4.00035642  |
| 1 | 1.13894104  | -10.55589542 | 2.12206522  |
| 6 | -1.88887946 | 6.58888032   | -5.19791523 |
| 1 | -1.31056424 | 7.06142169   | -6.01168948 |
| 6 | -8.77989559 | 0.35778425   | 2.87168202  |
| 1 | -8.79103815 | 0.62070821   | 3.94202665  |
| 7 | -4.71453833 | 8.26221639   | -5.82265091 |
| 7 | -5.19789483 | 8.89681603   | -4.76042218 |
| 1 | -9.21335638 | 7.20614242   | -2.60810881 |
| 6 | -5.33591468 | 7.04380238   | -5.94859608 |
| 1 | -9.66002747 | 5.21789390   | -1.19780676 |
| 6 | -8.39720419 | 6.76664143   | -2.01687432 |
| 7 | -6.13207703 | 8.09728802   | -4.19928087 |
| 6 | -8.64583535 | 5.63725197   | -1.22119729 |
| 1 | -6.20458359 | 9.27692920   | -2.49050696 |
| 1 | -6.53585745 | 4.42316080   | 2.02670059  |
| 6 | -6.84646108 | 8.52165539   | -2.97937873 |
| 6 | -6.25780950 | 6.93560549   | -4.90495322 |

|   |             |             |             |
|---|-------------|-------------|-------------|
| 1 | -7.02106169 | 2.40826949  | 3.41431677  |
| 6 | -7.23833402 | 3.66811604  | 1.64945349  |
| 6 | -7.11220422 | 7.34507400  | -2.06504087 |
| 6 | -7.51943132 | 2.54093382  | 2.44451548  |
| 6 | -7.61677988 | 5.05797777  | -0.43687960 |
| 6 | -7.88589393 | 3.86075093  | 0.40335786  |
| 1 | -7.79848203 | 9.00217435  | -3.27616311 |
| 6 | -8.46008073 | 1.57352308  | 2.01896486  |
| 6 | -6.07418504 | 6.77357254  | -1.29290960 |
| 6 | -6.32907730 | 5.65414166  | -0.48392006 |
| 6 | -8.81379286 | 2.87679245  | -0.02216832 |
| 6 | -9.09012322 | 1.75303727  | 0.77040817  |
| 1 | -5.05948999 | 7.19598033  | -1.34070557 |
| 1 | -9.31488792 | 2.97954779  | -0.99469783 |
| 1 | -5.51275032 | 5.21557889  | 0.10562804  |
| 1 | -9.80327548 | 0.99905585  | 0.42031841  |
| 6 | -2.73258340 | 5.42950854  | -5.77805026 |
| 6 | -4.96521856 | 6.03862920  | -7.00050635 |
| 6 | -3.43944574 | 5.80269864  | -7.11284216 |
| 1 | -5.36610902 | 6.34866806  | -7.98947654 |
| 1 | -5.47639309 | 5.08678184  | -6.75840902 |
| 1 | -3.47660261 | 5.10055060  | -5.02433488 |
| 1 | -2.07235936 | 4.55862365  | -5.94182187 |
| 1 | -2.96534763 | 6.70515721  | -7.55317290 |
| 1 | -3.29513203 | 4.99507137  | -7.85659980 |
| 1 | -6.98122090 | 6.16032696  | -4.64995996 |
| 1 | -2.52989672 | 7.33942098  | -4.71406767 |
| 1 | -9.75713011 | -0.05427781 | 2.57696616  |

### MC-PDI3

QM1//QM2: BLYP-D3(BJ)/def2-SVP//GFN2-xTB

Only solute macrocycle shown

| Atom | X           | Y           | Z          |
|------|-------------|-------------|------------|
| 6    | -3.26670913 | -2.71311818 | 4.44523039 |
| 6    | -4.07939518 | -2.19911951 | 3.40490654 |
| 6    | -2.72482364 | -1.80036873 | 5.39770396 |
| 6    | -4.40388865 | -0.84616458 | 3.27480051 |
| 1    | -4.51144333 | -2.92887499 | 2.71437725 |
| 6    | -1.79840403 | -2.26074033 | 6.45997597 |
| 6    | -2.99414956 | -0.39061761 | 5.27451593 |
| 6    | -3.83117497 | 0.08971412  | 4.20180581 |
| 8    | -1.32903239 | -3.40709805 | 6.52661327 |
| 7    | -1.45887148 | -1.33048207 | 7.45910717 |
| 6    | -2.42352866 | 0.55032116  | 6.20188094 |
| 6    | -4.07547183 | 1.49788993  | 4.06406957 |
| 6    | -1.79606441 | 0.03762070  | 7.44396355 |
| 6    | -2.57997600 | 1.95069266  | 5.98973045 |
| 6    | -3.43233506 | 2.38073182  | 4.94133914 |
| 8    | -1.58150882 | 0.73118994  | 8.44569940 |
| 1    | -3.55101248 | 3.46025243  | 4.80273521 |
| 6    | -5.34089137 | -0.37241569 | 2.24199911 |
| 6    | -4.96943973 | 1.98528509  | 2.99885337 |
| 6    | -5.93050954 | -1.24403741 | 1.30990336 |
| 6    | -5.63610738 | 1.03203995  | 2.15529440 |
| 6    | -5.18934016 | 3.35406731  | 2.76732374 |

### MC-PDI4

QM1//QM2: BLYP-D3(BJ)/def2-SVP//GFN2-xTB

Only solute macrocycle shown

| Atom | X           | Y           | Z           |
|------|-------------|-------------|-------------|
| 6    | -2.22493778 | -5.18163611 | -1.13645582 |
| 6    | -0.83819180 | -5.01964221 | -1.38762171 |
| 6    | -2.69371615 | -5.41050076 | 0.17149821  |
| 6    | 0.10417175  | -5.07364607 | -0.35211363 |
| 1    | -0.51688063 | -4.89864505 | -2.42672526 |
| 6    | -4.12268794 | -5.76017452 | 0.40043585  |
| 6    | -1.76342214 | -5.38911478 | 1.24912455  |
| 6    | -0.35627211 | -5.23310702 | 0.99761631  |
| 8    | -4.93478106 | -5.82743369 | -0.52290551 |
| 7    | -4.48503407 | -6.08959864 | 1.71533168  |
| 6    | -2.24822449 | -5.53248210 | 2.57940656  |
| 6    | 0.56592671  | -5.27685655 | 2.09873111  |
| 6    | -3.67676279 | -5.84582174 | 2.83319986  |
| 6    | -1.33631412 | -5.45675718 | 3.65205382  |
| 6    | 0.05694499  | -5.34821292 | 3.40198124  |
| 8    | -4.13071479 | -5.96741450 | 3.97337192  |
| 1    | 0.73435126  | -5.35223690 | 4.26159477  |
| 6    | 1.54902002  | -5.03179299 | -0.61851610 |
| 6    | 2.01083333  | -5.32940940 | 1.82223145  |
| 6    | 2.06476857  | -4.80859281 | -1.90261763 |
| 6    | 2.46356513  | -5.27296014 | 0.46103004  |
| 6    | 2.96146483  | -5.48082967 | 2.84152742  |

|   |             |             |             |   |             |             |             |
|---|-------------|-------------|-------------|---|-------------|-------------|-------------|
| 6 | -6.86334911 | -0.80339921 | 0.34488430  | 6 | 3.44449628  | -4.96853035 | -2.18507630 |
| 1 | -5.65726355 | -2.30446906 | 1.29837882  | 1 | 1.40184770  | -4.52568447 | -2.72568812 |
| 6 | -6.62297050 | 1.49279086  | 1.21549608  | 6 | 3.85461278  | -5.47893211 | 0.16726654  |
| 1 | -4.63359492 | 4.10671448  | 3.33731204  | 1 | 2.66511512  | -5.45492616 | 3.89442867  |
| 6 | -6.08351244 | 3.83273261  | 1.77929819  | 6 | 4.33118243  | -5.70537294 | 2.55127823  |
| 6 | -7.30840944 | 0.54406314  | 0.39394637  | 6 | 4.33549623  | -5.38121264 | -1.17021584 |
| 6 | -6.88332756 | 2.89525862  | 1.06857492  | 6 | 4.77360771  | -5.77616446 | 1.21282803  |
| 6 | -8.56259610 | 0.94233542  | -0.28054692 | 6 | 5.74119954  | -5.72978621 | -1.49828098 |
| 6 | -8.03867611 | 3.33287266  | 0.24507641  | 6 | 6.14895763  | -6.23291759 | 0.89546753  |
| 8 | -9.36025916 | 0.14273438  | -0.78779937 | 8 | 6.18040529  | -5.64528079 | -2.65042604 |
| 7 | -8.87028957 | 2.31744623  | -0.26816428 | 7 | 6.54045826  | -6.21560928 | -0.45603274 |
| 8 | -8.36153649 | 4.51570623  | 0.06240987  | 8 | 6.91735715  | -6.65625707 | 1.75970263  |
| 6 | -3.07816852 | -4.18765004 | 4.42810609  | 6 | 3.85556695  | -4.69463751 | -3.53302807 |
| 6 | -3.35335519 | -5.02674847 | 5.53688955  | 7 | 4.04273016  | -4.38878321 | -4.65024075 |
| 6 | -2.67246321 | -4.82125796 | 3.22832958  | 6 | 5.22412021  | -5.82154592 | 3.67024548  |
| 6 | -3.18261887 | -6.41227066 | 5.47137193  | 7 | 5.85753024  | -5.82734317 | 4.65943301  |
| 6 | -2.43218750 | -6.19851591 | 3.15866216  | 6 | -1.73829277 | -5.51861366 | 5.02956660  |
| 6 | -2.66716633 | -7.04002765 | 4.28978625  | 7 | -1.89553192 | -5.53842134 | 6.19434456  |
| 1 | -3.72408855 | -4.58031728 | 6.46986094  | 6 | -3.08986847 | -5.10870275 | -2.27770013 |
| 1 | -2.51499369 | -4.20253781 | 2.33462532  | 7 | -3.63508547 | -4.98639162 | -3.31097999 |
| 1 | -3.43124631 | -7.01434992 | 6.35140966  | 6 | -4.40246020 | 4.29955908  | 2.82761180  |
| 1 | -2.04262261 | -6.62746557 | 2.22991396  | 6 | -3.04049800 | 4.35887127  | 3.21905962  |
| 6 | -7.25415280 | -1.69457117 | -0.77710653 | 6 | -4.78030293 | 4.65396016  | 1.51500730  |
| 6 | -7.82351458 | -2.97619400 | -0.60828120 | 6 | -2.04557372 | 4.83560032  | 2.35479421  |
| 6 | -7.04689510 | -1.23886295 | -2.10331375 | 1 | -2.79057240 | 4.05316335  | 4.23937394  |
| 6 | -8.24936519 | -3.73581056 | -1.70770039 | 6 | -6.20983555 | 4.63439021  | 1.11486374  |
| 6 | -7.43071750 | -1.99528785 | -3.20987796 | 6 | -3.77911502 | 5.07227458  | 0.59178614  |
| 6 | -8.08078564 | -3.25663460 | -3.04441919 | 6 | -2.41280571 | 5.21679883  | 1.02097476  |
| 1 | -8.00187090 | -3.35308351 | 0.40796154  | 8 | -7.11545301 | 4.38771206  | 1.91456918  |
| 1 | -6.56736315 | -0.26022122 | -2.25246871 | 7 | -6.51013727 | 4.93325497  | -0.22086882 |
| 1 | -8.74951053 | -4.69365612 | -1.52152712 | 6 | -4.14125515 | 5.32808399  | -0.76420098 |
| 1 | -7.23485300 | -1.60578446 | -4.21300407 | 6 | -1.44081323 | 5.73661470  | 0.10257907  |
| 6 | -6.05097462 | 5.29067036  | 1.47991044  | 6 | -5.55801853 | 5.24401949  | -1.20844203 |
| 6 | -6.30635918 | 6.27991144  | 2.45786802  | 6 | -3.13165896 | 5.68122974  | -1.68409630 |
| 6 | -5.64548132 | 5.73097777  | 0.19575500  | 6 | -1.80334604 | 5.91029797  | -1.23926721 |
| 6 | -6.22386189 | 7.64983450  | 2.15494081  | 8 | -5.89591732 | 5.46330584  | -2.37395093 |
| 6 | -5.52749947 | 7.08696884  | -0.12130540 | 1 | -1.05721040 | 6.21629774  | -1.97958400 |
| 6 | -5.84746443 | 8.09654895  | 0.84638637  | 6 | -0.64522400 | 4.97655190  | 2.78260520  |
| 1 | -6.59250922 | 5.98111060  | 3.47725133  | 6 | -0.09872749 | 6.06941597  | 0.60049238  |
| 1 | -5.38144127 | 4.98464452  | -0.56452763 | 6 | -0.19459973 | 4.50788656  | 4.02378858  |
| 1 | -6.47933144 | 8.37526372  | 2.93513019  | 6 | 0.28313431  | 5.64781949  | 1.91968687  |
| 1 | -5.20161179 | 7.36181898  | -1.13106851 | 6 | 0.80515358  | 6.81857737  | -0.16360411 |
| 6 | -1.84969593 | 3.03164704  | 6.70681937  | 6 | 1.14694830  | 4.68901873  | 4.44760768  |
| 6 | -0.45687957 | 2.95810565  | 6.95843996  | 1 | -0.87747248 | 3.97904190  | 4.69517208  |
| 6 | -2.49413366 | 4.26236178  | 7.00187000  | 6 | 1.61594241  | 5.91704324  | 2.38926369  |
| 6 | 0.26335422  | 4.05578648  | 7.45119770  | 1 | 0.52204464  | 7.18632860  | -1.15469511 |
| 6 | -1.78917462 | 5.35921500  | 7.49920917  | 6 | 2.08474857  | 7.16731744  | 0.33788939  |
| 6 | -0.38628647 | 5.29425319  | 7.72147858  | 6 | 2.05751518  | 5.41332161  | 3.64793698  |
| 1 | 0.08877902  | 2.03400504  | 6.72810011  | 6 | 2.50647141  | 6.70158711  | 1.60186604  |
| 1 | -3.57590875 | 4.37195377  | 6.84852852  | 6 | 3.45363970  | 5.63758073  | 4.10817502  |
| 1 | 1.34397894  | 3.94022227  | 7.59128702  | 6 | 3.84531275  | 7.06964703  | 2.11952263  |
| 1 | -2.34194205 | 6.28203875  | 7.71103897  | 8 | 3.90843776  | 5.10017775  | 5.12286681  |
| 7 | -5.79138121 | 9.43751987  | 0.52624996  | 7 | 4.24201336  | 6.51081598  | 3.34181480  |
| 7 | 0.30530615  | 6.42291184  | 8.22159483  | 8 | 4.59886641  | 7.82328900  | 1.49685377  |
| 7 | -2.40341967 | -8.39068414 | 4.25169330  | 6 | 1.49098108  | 4.09141874  | 5.70892677  |
| 7 | -8.52008242 | -3.98653481 | -4.14620184 | 7 | 1.59488645  | 3.52132570  | 6.72923010  |

|   |              |              |             |   |              |             |             |
|---|--------------|--------------|-------------|---|--------------|-------------|-------------|
| 6 | -1.80671913  | -8.99326045  | 3.06539530  | 6 | 2.89234949   | 8.01947902  | -0.49232661 |
| 1 | -2.45893586  | -8.90128164  | 2.17002780  | 7 | 3.42311097   | 8.72440424  | -1.26563971 |
| 1 | -0.82580685  | -8.53398909  | 2.81676097  | 6 | -3.36000576  | 5.79373727  | -3.09810263 |
| 1 | -1.63100533  | -10.06681897 | 3.24439731  | 7 | -3.35547021  | 5.86476451  | -4.26926391 |
| 6 | -2.69288101  | -9.21669746  | 5.41700365  | 6 | -5.33721727  | 3.88949929  | 3.84067513  |
| 1 | -3.77409980  | -9.18830412  | 5.67197043  | 7 | -5.95222109  | 3.56033221  | 4.78533507  |
| 1 | -2.39925951  | -10.25883560 | 5.20970485  | 6 | 7.86477259   | -6.81642043 | -0.78159651 |
| 1 | -2.13442937  | -8.88107249  | 6.31598530  | 1 | 7.84510182   | -7.04958703 | -1.85822252 |
| 6 | -9.47227491  | -5.07848139  | -3.93659292 | 6 | 5.60408155   | 6.86760101  | 3.84425627  |
| 1 | -9.03127514  | -5.89887036  | -3.33439260 | 1 | 5.59674390   | 6.65183377  | 4.92208596  |
| 1 | -10.39627911 | -4.73951353  | -3.41408592 | 7 | 9.43688835   | -1.89443031 | -2.23838100 |
| 1 | -9.76722338  | -5.49909428  | -4.91359124 | 7 | 9.75814158   | -0.66389020 | -2.62166660 |
| 6 | -8.47899069  | -3.36107016  | -5.47155565 | 1 | 9.77918763   | 0.30100503  | 0.03900916  |
| 1 | -9.05888083  | -2.41242459  | -5.51161281 | 1 | 8.61211025   | 1.75866534  | 1.59872088  |
| 1 | -7.43926217  | -3.13085551  | -5.78329115 | 6 | 10.39897821  | -2.38133384 | -1.39136681 |
| 1 | -8.90544810  | -4.05555605  | -6.21502226 | 6 | 9.91965480   | 1.38332410  | -0.06114971 |
| 6 | -5.39049551  | 9.84590833   | -0.81587180 | 6 | 9.25504420   | 2.22506218  | 0.84124706  |
| 1 | -6.05638677  | 9.41310402   | -1.59319530 | 1 | 8.31802594   | 3.05836397  | 3.26238728  |
| 1 | -5.44809388  | 10.94467759  | -0.89075899 | 7 | 10.93648909  | -0.35378938 | -2.03220095 |
| 1 | -4.34901023  | 9.53283684   | -1.05566150 | 1 | 6.65244106   | 4.40838672  | 4.51697000  |
| 6 | -6.05776154  | 10.44502918  | 1.55035233  | 1 | 12.53053907  | 0.98881064  | -1.92503934 |
| 1 | -5.32707084  | 10.39733376  | 2.38815023  | 6 | 8.02398828   | 4.04411750  | 2.87428262  |
| 1 | -5.99718370  | 11.45015367  | 1.09959898  | 6 | 7.09685132   | 4.81401044  | 3.59674918  |
| 1 | -7.07260778  | 10.32829818  | 1.98602647  | 6 | 11.43619288  | 1.01911507  | -2.09145527 |
| 6 | 1.73483042   | 6.26850200   | 8.49472371  | 6 | 11.37045297  | -1.38385417 | -1.24976303 |
| 1 | 2.33281144   | 6.13569142   | 7.56464834  | 6 | 10.74679325  | 1.91562198  | -1.06972298 |
| 1 | 2.10955635   | 7.18070793   | 8.99402685  | 6 | 9.38446846   | 3.63362751  | 0.76613520  |
| 1 | 1.92193687   | 5.39595589   | 9.14616122  | 6 | 8.56334997   | 4.51232590  | 1.64498087  |
| 6 | 0.00088754   | 7.72586621   | 7.59866520  | 6 | 6.69974539   | 6.09050148  | 3.13750943  |
| 1 | 0.41828814   | 8.54031057   | 8.22159222  | 1 | 11.26578431  | 1.39631815  | -3.11828005 |
| 1 | 0.44388855   | 7.80328428   | 6.57753080  | 1 | 12.28853701  | -1.32339552 | -0.66124736 |
| 1 | -1.08574036  | 7.89215850   | 7.51063979  | 6 | 10.91463509  | 3.31586368  | -1.13350735 |
| 6 | 7.36506701   | 0.33340139   | -2.76597156 | 6 | 8.20561543   | 5.82031936  | 1.22606728  |
| 6 | 6.20719429   | 0.88534656   | -3.36374548 | 6 | 10.24652421  | 4.15994815  | -0.23284393 |
| 6 | 7.50648108   | -1.08528951  | -2.72302539 | 6 | 7.29580434   | 6.59327504  | 1.96164347  |
| 6 | 5.19588608   | 0.10480352   | -3.94423319 | 1 | 11.56038915  | 3.75423183  | -1.90830170 |
| 1 | 6.14892145   | 1.97705898   | -3.40203075 | 1 | 8.58745497   | 6.22012238  | 0.27707248  |
| 6 | 8.64228583   | -1.70364307  | -1.99383000 | 1 | 6.98546844   | 7.57212360  | 1.57870313  |
| 6 | 6.49331352   | -1.92754983  | -3.30792397 | 1 | 10.39711955  | 5.24438135  | -0.32047624 |
| 6 | 5.32154848   | -1.32519469  | -3.90071913 | 6 | 9.13515370   | -4.60155621 | -1.21285656 |
| 8 | 9.49864303   | -1.06428237  | -1.36581628 | 6 | 10.31921944  | -3.73664354 | -0.74456000 |
| 7 | 8.71497259   | -3.10800117  | -2.00013176 | 6 | 9.06392897   | -5.92093859 | -0.43150491 |
| 6 | 6.62045953   | -3.36231751  | -3.28203242 | 1 | 8.19036938   | -4.04563942 | -1.06080230 |
| 6 | 4.28344145   | -2.16391382  | -4.43383769 | 1 | 9.21735882   | -4.80127895 | -2.30055926 |
| 6 | 7.73987086   | -3.96962149  | -2.52818942 | 1 | 9.04355122   | -5.70670535 | 0.65298222  |
| 6 | 5.61664000   | -4.18529170  | -3.87904989 | 1 | 9.98208451   | -6.52368008 | -0.59967462 |
| 6 | 4.46341833   | -3.55228261  | -4.41036896 | 1 | 10.25795104  | -3.59315743 | 0.35645858  |
| 8 | 7.84327724   | -5.18717256  | -2.30999465 | 1 | 11.27066616  | -4.27567485 | -0.93126817 |
| 1 | 3.71617753   | -4.20178128  | -4.87653175 | 1 | 7.92436337   | -7.76116376 | -0.21201045 |
| 6 | 4.04283007   | 0.71588362   | -4.63094476 | 1 | 5.71982310   | 7.95384219  | 3.69496856  |
| 6 | 3.08875401   | -1.55158175  | -5.04065273 | 6 | -5.79370987  | -6.73633268 | 1.96412190  |
| 6 | 3.87234676   | 2.10584226   | -4.70520042 | 1 | -5.60540401  | -7.45869198 | 2.77927650  |
| 6 | 3.03056950   | -0.13030966  | -5.20089560 | 6 | -7.95152025  | 4.96294649  | -0.59247051 |
| 6 | 2.01072714   | -2.32114136  | -5.50219846 | 1 | -7.97811379  | 5.44042492  | -1.58334630 |
| 6 | 2.79361886   | 2.71558610   | -5.39626458 | 7 | -11.09099526 | -6.59812986 | 2.10364684  |
| 1 | 4.56597289   | 2.76945130   | -4.17888446 | 7 | -11.76614170 | -6.26652653 | 1.01106377  |

|   |             |             |             |   |              |             |             |
|---|-------------|-------------|-------------|---|--------------|-------------|-------------|
| 6 | 1.93462152  | 0.45686380  | -5.92667233 | 1 | -13.01130256 | -2.20837157 | 0.44487138  |
| 1 | 2.01678540  | -3.40480671 | -5.35364082 | 6 | -10.19202310 | -5.60668296 | 2.40511097  |
| 6 | 0.90969535  | -1.77477626 | -6.20713611 | 1 | -12.15036861 | 0.11148540  | 0.37319481  |
| 6 | 1.88822996  | 1.87887035  | -6.10898348 | 6 | -12.08401664 | -1.98968689 | -0.10460108 |
| 6 | 0.87884261  | -0.37304607 | -6.43887853 | 7 | -11.31087555 | -5.06709163 | 0.60119175  |
| 6 | 0.98927898  | 2.42312680  | -7.15483103 | 6 | -11.58195050 | -0.68078900 | -0.13062898 |
| 6 | -0.27482574 | 0.27488343  | -7.12431564 | 1 | -11.49779286 | -5.07697884 | -1.48565224 |
| 8 | 1.15547597  | 3.53294666  | -7.68942279 | 1 | -8.49467100  | 0.71373782  | -2.50480947 |
| 7 | -0.06122223 | 1.59988063  | -7.57978386 | 6 | -11.85647434 | -4.46564100 | -0.63568095 |
| 8 | -1.35259270 | -0.28124197 | -7.35040199 | 6 | -10.32509042 | -4.61356348 | 1.43189129  |
| 6 | 8.37235410  | 1.30979258  | -2.26227159 | 1 | -7.45472172  | 2.96168172  | -2.38584867 |
| 6 | 8.01919791  | 2.29744735  | -1.30986095 | 6 | -8.80484638  | 1.40115561  | -1.70932482 |
| 6 | 9.69421077  | 1.33935018  | -2.76581858 | 6 | -11.40191457 | -3.03261805 | -0.77024585 |
| 6 | 8.95952207  | 3.21087770  | -0.80804182 | 6 | -8.21528159  | 2.67110152  | -1.64852478 |
| 6 | 10.64086873 | 2.25339956  | -2.29732870 | 6 | -10.36522047 | -0.37209819 | -0.79651940 |
| 6 | 10.31659478 | 3.18628734  | -1.25779151 | 6 | -9.78333896  | 1.00138628  | -0.76432274 |
| 1 | 6.98925987  | 2.33234969  | -0.92216784 | 1 | -12.95804583 | -4.54995111 | -0.58201992 |
| 1 | 9.97291483  | 0.64153224  | -3.56503208 | 6 | -8.58486297  | 3.58829384  | -0.64159552 |
| 1 | 8.64100208  | 3.92749226  | -0.04159976 | 6 | -10.21462329 | -2.73328141 | -1.46882162 |
| 1 | 11.64139806 | 2.25011398  | -2.74136956 | 6 | -9.69922660  | -1.42917394 | -1.47569404 |
| 6 | 2.59119976  | 4.17279011  | -5.21712507 | 6 | -10.15279736 | 1.93518768  | 0.23803749  |
| 6 | 3.66760669  | 5.09557441  | -5.15780459 | 6 | -9.56180511  | 3.20486963  | 0.29910619  |
| 6 | 1.29355445  | 4.67628476  | -4.94225327 | 1 | -9.67169756  | -3.53891637 | -1.98085695 |
| 6 | 3.45897579  | 6.45494028  | -4.90121731 | 1 | -10.88687329 | 1.66098972  | 1.00742326  |
| 6 | 1.06541434  | 6.02100227  | -4.65285783 | 1 | -8.74139179  | -1.24482248 | -1.97874733 |
| 6 | 2.14506742  | 6.96313331  | -4.64677534 | 1 | -9.85485900  | 3.91032929  | 1.08870092  |
| 1 | 4.69646317  | 4.74267577  | -5.31644007 | 6 | -6.94031334  | -5.79014704 | 2.37158056  |
| 1 | 0.44318177  | 3.98252672  | -4.90391802 | 6 | -9.24244638  | -5.72879535 | 3.56264682  |
| 1 | 4.32327794  | 7.12510347  | -4.85089525 | 6 | -7.97711791  | -6.55315874 | 3.21600957  |
| 1 | 0.04360392  | 6.33190869  | -4.40441384 | 1 | -9.77655632  | -6.22212872 | 4.39965880  |
| 6 | -0.11634558 | -2.74774787 | -6.68605412 | 1 | -8.94294618  | -4.72103958 | 3.91363973  |
| 6 | -0.45933256 | -2.87804500 | -8.05351677 | 1 | -7.40318812  | -5.34432929 | 1.46807073  |
| 6 | -0.74516811 | -3.62681594 | -5.77465357 | 1 | -6.53343180  | -4.94722438 | 2.96287228  |
| 6 | -1.40966445 | -3.81454132 | -8.48489414 | 1 | -8.28892803  | -7.47892609 | 2.68698507  |
| 6 | -1.71705377 | -4.55377517 | -6.18524872 | 1 | -7.48650370  | -6.88305710 | 4.15599688  |
| 6 | -2.08247160 | -4.67200188 | -7.55878340 | 1 | -9.80344373  | -3.66944401 | 1.27985635  |
| 1 | 0.01389588  | -2.22702022 | -8.80053720 | 1 | -6.04273870  | -7.29187301 | 1.04331100  |
| 1 | -0.51880024 | -3.54855110 | -4.70270145 | 1 | -8.47559778  | 5.60707831  | 0.13370256  |
| 1 | -1.64417290 | -3.84442782 | -9.55452160 |   |              |             |             |
| 1 | -2.22365022 | -5.14189008 | -5.41281502 |   |              |             |             |
| 6 | 5.67191733  | -5.66674450 | -4.04006754 |   |              |             |             |
| 6 | 4.53434588  | -6.45674439 | -3.73631186 |   |              |             |             |
| 6 | 6.79858512  | -6.34913909 | -4.57415816 |   |              |             |             |
| 6 | 4.53123115  | -7.84861017 | -3.87859143 |   |              |             |             |
| 6 | 6.80328753  | -7.73098263 | -4.76343553 |   |              |             |             |
| 6 | 5.67288489  | -8.53308458 | -4.39938744 |   |              |             |             |
| 1 | 3.63325765  | -5.97752399 | -3.33188379 |   |              |             |             |
| 1 | 7.69680534  | -5.78348933 | -4.85527310 |   |              |             |             |
| 1 | 3.63343496  | -8.39874436 | -3.57772417 |   |              |             |             |
| 1 | 7.69585821  | -8.19949325 | -5.19279191 |   |              |             |             |
| 7 | -3.06716094 | -5.58554028 | -7.98551930 |   |              |             |             |
| 7 | 5.68379238  | -9.90962576 | -4.53968662 |   |              |             |             |
| 7 | 11.28488215 | 4.01536501  | -0.71769949 |   |              |             |             |
| 7 | 1.92263726  | 8.30332969  | -4.39761328 |   |              |             |             |
| 6 | 12.61783512 | 4.06728484  | -1.31826806 |   |              |             |             |
| 1 | 13.10632694 | 3.07027080  | -1.32551464 |   |              |             |             |



|   |             |              |              |
|---|-------------|--------------|--------------|
| 1 | 12.60203849 | 4.43236363   | -2.37127970  |
| 1 | 13.25930067 | 4.74330004   | -0.72695924  |
| 6 | 10.89914262 | 5.08602996   | 0.19857468   |
| 1 | 11.80811193 | 5.55527564   | 0.61497869   |
| 1 | 10.29427302 | 5.87573906   | -0.30215260  |
| 1 | 10.28410538 | 4.69899369   | 1.03717441   |
| 6 | 0.56269590  | 8.80923495   | -4.21907604  |
| 1 | 0.58745698  | 9.91089848   | -4.17885863  |
| 1 | -0.10552212 | 8.51432327   | -5.05495601  |
| 1 | 0.08697344  | 8.45027658   | -3.27841513  |
| 6 | 3.05061923  | 9.22160722   | -4.27773998  |
| 1 | 2.68402412  | 10.19964772  | -3.92194545  |
| 1 | 3.80875571  | 8.84569427   | -3.55918887  |
| 1 | 3.57361799  | 9.38437489   | -5.24683295  |
| 6 | -3.99526408 | -6.09731276  | -6.96622190  |
| 1 | -4.66869072 | -6.83636326  | -7.43523242  |
| 1 | -3.45349339 | -6.60299814  | -6.14498752  |
| 1 | -4.61526359 | -5.28897815  | -6.51705836  |
| 6 | -3.68111901 | -5.35961635  | -9.30515292  |
| 1 | -2.92269216 | -5.37873236  | -10.11020961 |
| 1 | -4.39862251 | -6.17396835  | -9.51429566  |
| 1 | -4.23393035 | -4.39395731  | -9.36343797  |
| 6 | 6.89544320  | -10.59916134 | -4.98490473  |
| 1 | 6.70479958  | -11.68578590 | -5.01320787  |
| 1 | 7.19454509  | -10.28231595 | -6.00611913  |
| 1 | 7.76000197  | -10.41971217 | -4.30771441  |
| 6 | 4.56730737  | -10.69576378 | -4.02156873  |
| 1 | 4.74376413  | -11.76372448 | -4.23072746  |
| 1 | 4.42876397  | -10.55968512 | -2.92682887  |
| 1 | 3.60246056  | -10.41196859 | -4.48917589  |
| 6 | 9.86896518  | -3.75404127  | -1.32772414  |
| 1 | 10.68636080 | -3.01599782  | -1.31676075  |
| 6 | -0.71224286 | -1.83550773  | 8.64308266   |
| 1 | -1.05473690 | -2.87059730  | 8.80426524   |
| 7 | 9.05528736  | -1.45351601  | 3.59558019   |
| 7 | 9.14906304  | -0.88681520  | 4.78915365   |
| 1 | 7.74432679  | -3.80818293  | 7.26147563   |
| 1 | 5.33437720  | -3.87964644  | 7.74890182   |
| 6 | 9.28419342  | -2.80241302  | 3.70862170   |
| 6 | 7.22947325  | -2.87603834  | 7.53725083   |
| 6 | 5.85353727  | -2.91372798  | 7.80074913   |
| 1 | 3.37210277  | -3.46071052  | 6.93958821   |
| 7 | 9.45252315  | -1.85845110  | 5.68063332   |
| 1 | 0.88641338  | -3.49644552  | 7.17014277   |
| 1 | 10.01274800 | -2.35887135  | 7.62835964   |
| 6 | 2.87677084  | -2.73138202  | 7.59571773   |
| 6 | 1.47994308  | -2.75374156  | 7.71391990   |
| 6 | 9.38697856  | -1.59500505  | 7.13045616   |
| 6 | 9.54837048  | -3.06902610  | 5.05591160   |
| 6 | 7.94122071  | -1.65700375  | 7.59752093   |
| 6 | 5.13523136  | -1.73106254  | 8.11755717   |
| 6 | 3.65428322  | -1.75048236  | 8.26639616   |
| 6 | 0.80012938  | -1.78971498  | 8.49193719   |
| 1 | 9.83535661  | -0.60361689  | 7.32205237   |
| 1 | 9.75272479  | -3.99589128  | 5.59637193   |
| 6 | 7.25217762  | -0.49152465  | 7.98852108   |

|   |              |             |              |
|---|--------------|-------------|--------------|
| 6 | 2.96479738   | -0.77447946 | 9.03127361   |
| 6 | 5.86891863   | -0.52582639 | 8.23559359   |
| 6 | 1.56172063   | -0.78893800 | 9.13379507   |
| 1 | 7.80308977   | 0.45581695  | 8.08369390   |
| 1 | 3.52776707   | 0.00424539  | 9.56379372   |
| 1 | 1.05868229   | -0.01234466 | 9.72684678   |
| 1 | 5.34721185   | 0.40962651  | 8.47667663   |
| 6 | 9.49951673   | -3.15497828 | 1.17229565   |
| 6 | 9.19732411   | -3.76397186 | 2.55491847   |
| 6 | 9.57092894   | -4.25020074 | 0.09818649   |
| 1 | 8.72020498   | -2.41166198 | 0.91491204   |
| 1 | 10.46150416  | -2.60353051 | 1.20286320   |
| 1 | 8.63286405   | -4.83760426 | 0.09621906   |
| 1 | 10.36733714  | -4.97250885 | 0.37420557   |
| 1 | 8.17993672   | -4.21603926 | 2.53553985   |
| 1 | 9.87904565   | -4.61745781 | 2.75133482   |
| 1 | 10.17213062  | -4.60002940 | -1.96776514  |
| 1 | -1.01715130  | -1.20595386 | 9.49086522   |
| 6 | -0.95614971  | 2.12553830  | -8.64073094  |
| 1 | -1.39688461  | 1.24266092  | -9.13102542  |
| 6 | -10.19624841 | 2.72291507  | -0.80524217  |
| 1 | -10.53788270 | 3.58723438  | -0.21472967  |
| 7 | -5.43060940  | 1.51852295  | -10.29220750 |
| 7 | -6.36252413  | 2.27258086  | -10.85943192 |
| 1 | -9.54811323  | 2.55906414  | -9.58431215  |
| 6 | -4.97630160  | 2.13180065  | -9.14947803  |
| 1 | -10.47524445 | 2.23391970  | -7.30233396  |
| 6 | -9.32618578  | 3.29247296  | -8.79577364  |
| 7 | -6.50270428  | 3.38434669  | -10.09968699 |
| 6 | -9.85701905  | 3.11642341  | -7.51277544  |
| 1 | -7.17686974  | 5.33617573  | -10.55509158 |
| 1 | -10.25480877 | 5.76626781  | -4.40830885  |
| 6 | -7.60752445  | 4.34291311  | -10.32712464 |
| 6 | -5.65749251  | 3.34459802  | -9.02761626  |
| 1 | -10.49802286 | 5.19325295  | -2.00104011  |
| 6 | -10.16575940 | 4.71648223  | -4.09573031  |
| 6 | -8.45976703  | 4.37158871  | -9.07125699  |
| 6 | -10.30094433 | 4.39534977  | -2.73047780  |
| 6 | -9.54615838  | 4.02099414  | -6.46704508  |
| 6 | -9.89317740  | 3.70848569  | -5.05552229  |
| 1 | -8.16118012  | 3.96962362  | -11.20763384 |
| 6 | -10.15960023 | 3.06478618  | -2.28296687  |
| 6 | -8.22069497  | 5.32879302  | -8.06538848  |
| 6 | -8.76083457  | 5.16043382  | -6.77967830  |
| 6 | -9.82897474  | 2.36236345  | -4.60557605  |
| 6 | -9.94726805  | 2.04780532  | -3.24351015  |
| 1 | -7.54997045  | 6.17714512  | -8.26754988  |
| 1 | -9.63098696  | 1.56177790  | -5.33304917  |
| 1 | -8.49050729  | 5.88086646  | -5.99489179  |
| 1 | -9.83784332  | 1.01124641  | -2.89863695  |
| 6 | -2.04808314  | 3.09096463  | -8.14679857  |
| 6 | -4.05480361  | 1.45991557  | -8.16861854  |
| 6 | -3.17496495  | 2.42013796  | -7.34275211  |
| 1 | -3.43435804  | 0.70297624  | -8.68574340  |
| 1 | -4.70461848  | 0.89399382  | -7.46857741  |
| 1 | -2.47705074  | 3.59345774  | -9.04108713  |

|   |              |            |             |
|---|--------------|------------|-------------|
| 1 | -1.58323976  | 3.88755191 | -7.53362609 |
| 1 | -2.73507094  | 1.85970851 | -6.49413908 |
| 1 | -3.81086605  | 3.20974065 | -6.89209222 |
| 1 | -5.63153416  | 4.13268277 | -8.27352533 |
| 1 | -0.30886725  | 2.63516296 | -9.37007885 |
| 1 | -10.86728577 | 1.86605783 | -0.62784266 |

### MC-PDI5

QM1//QM2: BLYP-D3(BJ)/def2-SVP//GFN2-xTB

Only solute macrocycle shown

| Atom | X           | Y           | Z           |
|------|-------------|-------------|-------------|
| 6    | 3.31172813  | 3.82422339  | 1.79463527  |
| 6    | 3.22171900  | 2.43499596  | 2.07293277  |
| 6    | 4.33284343  | 4.36796668  | 1.01036338  |
| 6    | 4.21411815  | 1.55982492  | 1.51560913  |
| 6    | 4.36166325  | 5.81736080  | 0.72849109  |
| 6    | 5.38445580  | 3.52995689  | 0.54973791  |
| 6    | 5.38072281  | 2.14052786  | 0.89497750  |
| 8    | 3.52697211  | 6.61486947  | 1.17617977  |
| 7    | 5.41291780  | 6.28550394  | -0.09249227 |
| 6    | 6.43494302  | 4.05349379  | -0.25411744 |
| 6    | 6.54864453  | 1.34865931  | 0.60518784  |
| 6    | 6.41614506  | 5.47225349  | -0.66414487 |
| 6    | 7.43168390  | 3.19584874  | -0.73715542 |
| 6    | 7.50502213  | 1.83698417  | -0.34391794 |
| 8    | 7.24483218  | 5.95519705  | -1.45237578 |
| 6    | 4.15138328  | 0.08699024  | 1.49007636  |
| 6    | 6.65907492  | 0.07662006  | 1.33121750  |
| 6    | 2.95682977  | -0.69574327 | 1.35898703  |
| 6    | 5.41399524  | -0.60045798 | 1.59654897  |
| 6    | 7.88895286  | -0.52675022 | 1.75190403  |
| 6    | 3.02223878  | -2.08884700 | 1.62812367  |
| 6    | 5.43410746  | -1.98713291 | 1.95695040  |
| 6    | 7.86077197  | -1.86521564 | 2.21470307  |
| 6    | 4.21744404  | -2.72588364 | 1.99143780  |
| 6    | 6.67667502  | -2.60742014 | 2.26884540  |
| 6    | 4.23881662  | -4.16714305 | 2.33367616  |
| 6    | 6.70723146  | -4.00810798 | 2.73412969  |
| 8    | 3.22810144  | -4.88338464 | 2.29221904  |
| 7    | 5.48659943  | -4.71124721 | 2.73147669  |
| 8    | 7.74631188  | -4.56863622 | 3.11738281  |
| 1    | 8.15520227  | 3.60414483  | -1.45222130 |
| 1    | 8.78501446  | -2.35034600 | 2.55056206  |
| 1    | 2.11220994  | -2.69555444 | 1.54479904  |
| 1    | 2.56354311  | 4.51166035  | 2.20737416  |
| 6    | 2.12949144  | 1.98786008  | 2.96511185  |
| 6    | 2.29867507  | 0.93625144  | 3.90183322  |
| 6    | 0.87344413  | 2.65080203  | 2.97613793  |
| 6    | 1.27880632  | 0.54804602  | 4.77547726  |
| 6    | -0.15055453 | 2.29531882  | 3.85770737  |
| 6    | 0.00871838  | 1.21063267  | 4.77586107  |
| 1    | 3.25887424  | 0.40948651  | 3.96252262  |
| 1    | 0.67156468  | 3.45187832  | 2.25270592  |
| 1    | 1.47119821  | -0.27545768 | 5.47035285  |
| 1    | -1.09692231 | 2.84544148  | 3.80220606  |

### MC-PDI6

QM1//QM2: BLYP-D3(BJ)/def2-SVP//GFN2-xTB

Only solute macrocycle shown

| Atom | X           | Y           | Z           |
|------|-------------|-------------|-------------|
| 6    | -0.83738864 | -3.51184449 | 2.11962148  |
| 6    | -2.17664434 | -3.88914836 | 1.93368624  |
| 6    | 0.12309925  | -3.80025764 | 1.14885672  |
| 6    | -2.61300050 | -4.54873489 | 0.76891684  |
| 1    | -2.87558801 | -3.63460264 | 2.73028921  |
| 6    | 1.55064558  | -3.45702199 | 1.39554422  |
| 6    | -0.28599806 | -4.40945278 | -0.07150061 |
| 6    | -1.66651470 | -4.74016981 | -0.29870522 |
| 8    | 1.91771122  | -2.85097558 | 2.40731350  |
| 7    | 2.47724685  | -3.87017633 | 0.41674605  |
| 6    | 0.68456316  | -4.69546987 | -1.07004616 |
| 6    | -2.07929823 | -5.27486243 | -1.56856611 |
| 6    | 2.12745268  | -4.44649168 | -0.81658205 |
| 6    | 0.29985770  | -5.31191961 | -2.25904953 |
| 6    | -1.05261862 | -5.63065414 | -2.47671091 |
| 8    | 2.99906021  | -4.75550554 | -1.63522718 |
| 6    | -3.98024007 | -5.05351309 | 0.59256563  |
| 6    | -3.51584000 | -5.37050662 | -1.84679336 |
| 6    | -4.92859194 | -5.20686120 | 1.63053485  |
| 6    | -4.43166551 | -5.36241200 | -0.73714924 |
| 6    | -4.04180669 | -5.44050934 | -3.15174893 |
| 6    | -6.28409117 | -5.50059586 | 1.41013830  |
| 6    | -5.81931152 | -5.64895536 | -0.97729468 |
| 1    | -3.38991439 | -5.30903633 | -4.02281165 |
| 6    | -5.41132490 | -5.65853541 | -3.38112031 |
| 6    | -6.73665400 | -5.72536814 | 0.11074706  |
| 6    | -6.29320601 | -5.82171336 | -2.30803456 |
| 6    | -8.16541890 | -6.06820410 | -0.11403306 |
| 6    | -7.71967270 | -6.13913956 | -2.56827318 |
| 8    | -8.96748824 | -6.17065029 | 0.82396938  |
| 7    | -8.56314492 | -6.28607661 | -1.44200060 |
| 8    | -8.17047680 | -6.27356494 | -3.70805406 |
| 1    | 1.05226706  | -5.59485600 | -3.00280817 |
| 1    | -5.79706889 | -5.72519832 | -4.40571387 |
| 1    | -6.97011259 | -5.57550885 | 2.26047381  |
| 1    | -0.53592362 | -3.01413322 | 3.04677970  |
| 7    | -4.52474523 | -5.15733595 | 3.05651511  |
| 8    | -3.71279049 | -6.00009315 | 3.44186795  |
| 8    | -5.05169423 | -4.29242925 | 3.77519664  |
| 7    | -1.29770043 | -6.51644401 | -3.64487489 |
| 8    | -2.04518975 | -7.49056658 | -3.47651551 |
| 8    | -0.68142696 | -6.27157705 | -4.69108975 |
| 6    | 5.36067886  | 3.90110518  | -2.81655757 |
| 6    | 3.99448435  | 4.08059892  | -2.53404341 |

|   |             |             |             |   |             |             |             |
|---|-------------|-------------|-------------|---|-------------|-------------|-------------|
| 6 | 1.67996901  | -0.09187966 | 0.91260924  | 6 | 6.33401167  | 4.23408351  | -1.87288830 |
| 6 | 1.65923385  | 0.93014662  | -0.07525603 | 6 | 3.55365698  | 4.57708130  | -1.29280772 |
| 6 | 0.42995298  | -0.47353425 | 1.46800796  | 1 | 3.28677294  | 3.80438663  | -3.31724333 |
| 6 | 0.48642854  | 1.59491865  | -0.43045485 | 6 | 7.77303395  | 4.12917412  | -2.22656453 |
| 6 | -0.75179380 | 0.19217290  | 1.14269170  | 6 | 5.93257516  | 4.66383500  | -0.57704475 |
| 6 | -0.75179733 | 1.28131325  | 0.21580274  | 6 | 4.53578964  | 4.77748384  | -0.25416908 |
| 1 | 2.59424258  | 1.23119241  | -0.56449824 | 8 | 8.15666442  | 3.74650968  | -3.33635960 |
| 1 | 0.38991656  | -1.26217272 | 2.23012083  | 7 | 8.70385757  | 4.48457861  | -1.22896145 |
| 1 | 0.54079761  | 2.38554016  | -1.18784366 | 6 | 6.92052829  | 4.98289584  | 0.39726241  |
| 1 | -1.67223727 | -0.11160101 | 1.64728636  | 6 | 4.13987655  | 5.10947298  | 1.08506977  |
| 6 | 9.18043743  | 0.19629304  | 1.75177992  | 6 | 8.37245771  | 4.88690547  | 0.07899623  |
| 6 | 10.38455111 | -0.45093483 | 1.37579461  | 6 | 6.52992817  | 5.42524116  | 1.65921684  |
| 6 | 9.28054805  | 1.55344473  | 2.15239411  | 6 | 5.16402579  | 5.50348846  | 1.97637676  |
| 6 | 11.60876367 | 0.22649531  | 1.33456812  | 8 | 9.25206274  | 5.13880763  | 0.90623643  |
| 6 | 10.49398587 | 2.24629897  | 2.11759177  | 6 | 2.15667623  | 4.94033804  | -1.00350545 |
| 6 | 11.69167184 | 1.61449140  | 1.65611096  | 6 | 2.71969762  | 5.01393137  | 1.43748018  |
| 1 | 10.34394524 | -1.50334934 | 1.06218536  | 6 | 1.15050806  | 5.16872270  | -1.96701894 |
| 1 | 8.38174920  | 2.08036517  | 2.50170387  | 6 | 1.75550322  | 5.08308489  | 0.37239206  |
| 1 | 12.50738657 | -0.31328989 | 1.02453339  | 6 | 2.25318774  | 4.88212777  | 2.76104344  |
| 1 | 10.51897609 | 3.28818978  | 2.45128132  | 6 | -0.18005001 | 5.50101182  | -1.65004169 |
| 6 | 8.49695304  | 0.95719364  | -1.00112169 | 6 | 0.38052306  | 5.32362106  | 0.71076528  |
| 6 | 9.76795370  | 1.43379305  | -1.41234933 | 1 | 2.95849271  | 4.68975458  | 3.57589017  |
| 6 | 8.18355543  | -0.38859206 | -1.32781204 | 6 | 0.88647754  | 4.99374281  | 3.07455159  |
| 6 | 10.67021972 | 0.62741546  | -2.11546299 | 6 | -0.56638486 | 5.59954606  | -0.31542625 |
| 6 | 9.07766082  | -1.21375631 | -2.01182481 | 6 | -0.04064682 | 5.29922831  | 2.07149205  |
| 6 | 10.35495572 | -0.72852998 | -2.43331663 | 6 | -1.91415226 | 6.12415593  | 0.03341651  |
| 1 | 10.07093334 | 2.45540269  | -1.14560455 | 6 | -1.45219085 | 5.60056702  | 2.42792281  |
| 1 | 7.20477146  | -0.80065133 | -1.04773930 | 8 | -2.67781338 | 6.59103368  | -0.81651612 |
| 1 | 8.77214035  | -2.24015304 | -2.23576244 | 7 | -2.26078221 | 6.12024668  | 1.39521270  |
| 7 | 12.87569450 | 2.32349227  | 1.51008635  | 8 | -1.89288903 | 5.46968585  | 3.57315907  |
| 7 | -1.89748646 | 2.01685467  | -0.03972601 | 1 | 7.27880167  | 5.75354161  | 2.38719536  |
| 7 | -1.01085580 | 0.82580003  | 5.62765491  | 1 | 0.54553296  | 4.88639404  | 4.11165635  |
| 6 | -3.08460756 | 1.79222504  | 0.78180024  | 1 | -0.90150552 | 5.71402510  | -2.44789517 |
| 1 | -2.88873061 | 1.96659872  | 1.86314034  | 1 | 5.67098411  | 3.52655273  | -3.79842783 |
| 1 | -3.88406605 | 2.48259067  | 0.46854516  | 7 | 1.45511594  | 5.18273980  | -3.42144834 |
| 1 | -3.46031512 | 0.75711496  | 0.67351332  | 8 | 1.06148725  | 4.21881316  | -4.09205550 |
| 6 | -1.80098884 | 3.25328279  | -0.82063098 | 8 | 2.04640765  | 6.17032229  | -3.86503205 |
| 1 | -2.76378498 | 3.78871862  | -0.77950484 | 7 | 4.86436095  | 6.16031172  | 3.26967891  |
| 1 | -1.02261889 | 3.93712362  | -0.42296712 | 8 | 4.05035837  | 7.09070759  | 3.25993021  |
| 1 | -1.55852053 | 3.06084393  | -1.88689724 | 8 | 5.49655379  | 5.77132725  | 4.26201121  |
| 6 | -0.77948591 | -0.22911375 | 6.60832462  | 6 | 3.92859860  | -3.74340871 | 0.69607390  |
| 1 | -1.75128989 | -0.57009281 | 7.00609738  | 1 | 4.03120350  | -3.06164784 | 1.55360300  |
| 1 | -0.29759897 | -1.10360461 | 6.13758320  | 6 | 10.15132153 | 4.31492081  | -1.54394296 |
| 1 | -0.13771354 | 0.09887636  | 7.45845341  | 1 | 10.69655085 | 5.06537584  | -0.95057551 |
| 6 | -2.12561838 | 1.73872263  | 5.88244181  | 7 | 8.72049900  | -5.81316368 | 2.93616257  |
| 1 | -1.80486639 | 2.65275182  | 6.43233558  | 7 | 10.01995465 | -5.57119453 | 2.88750144  |
| 1 | -2.61576023 | 2.06371656  | 4.94789288  | 1 | 10.34051543 | -4.34233648 | -0.94456480 |
| 1 | -2.88559519 | 1.21599370  | 6.48753510  | 6 | 8.26351144  | -6.14267829 | 1.68467884  |
| 6 | 14.12361403 | 1.58956177  | 1.28658355  | 1 | 10.13160938 | -2.00549074 | -1.66297405 |
| 1 | 14.06497858 | 0.96654074  | 0.37130059  | 6 | 10.94016142 | -3.57808903 | -0.43517282 |
| 1 | 14.94430170 | 2.31471063  | 1.15129535  | 7 | 10.42130383 | -5.76025713 | 1.60576797  |
| 1 | 14.38188876 | 0.92992797  | 2.14439429  | 6 | 10.82717956 | -2.24691620 | -0.84969751 |
| 6 | 12.98054914 | 3.66556229  | 2.08554823  | 1 | 12.43394040 | -5.46226913 | 2.05316426  |
| 1 | 13.97247455 | 4.08227185  | 1.83977984  | 1 | 11.83281575 | 1.03506022  | 1.38177251  |
| 1 | 12.20916699 | 4.33962837  | 1.66213439  | 6 | 11.77013676 | -5.35619658 | 1.17657710  |
| 1 | 12.86201371 | 3.65670561  | 3.19284840  | 6 | 9.35874683  | -6.11683689 | 0.81973663  |

|   |              |             |             |   |              |             |             |
|---|--------------|-------------|-------------|---|--------------|-------------|-------------|
| 7 | 11.24735027  | -1.54489278 | -3.12012596 | 1 | 11.24578514  | 3.37406937  | 0.80031917  |
| 6 | 10.80539254  | -2.87009648 | -3.55234348 | 6 | 11.47385900  | 1.25922449  | 0.36740932  |
| 1 | 10.45450520  | -3.47574276 | -2.69348215 | 6 | 11.76962970  | -3.92812694 | 0.65092163  |
| 1 | 9.96764394   | -2.82896089 | -4.28585525 | 6 | 11.13882970  | 2.58360739  | 0.04599564  |
| 1 | 11.65256727  | -3.39358683 | -4.02651725 | 6 | 11.54564284  | -1.21094258 | -0.20083958 |
| 6 | 12.34505218  | -0.93787245 | -3.87712665 | 6 | 11.29928243  | 0.20986026  | -0.57207425 |
| 1 | 12.96622203  | -0.27642321 | -3.24387612 | 1 | 12.09594354  | -6.06994794 | 0.39562829  |
| 1 | 13.00743239  | -1.73348051 | -4.26245834 | 6 | 10.61475050  | 2.90674668  | -1.22310631 |
| 1 | 11.98134914  | -0.33863722 | -4.74412487 | 6 | 12.53190365  | -2.91683753 | 1.26546246  |
| 1 | 11.64045169  | 1.04354897  | -2.40523501 | 6 | 12.42808811  | -1.58091571 | 0.84236197  |
| 6 | -7.70503171  | 2.59216138  | 0.17743676  | 6 | 10.79966697  | 0.55223807  | -1.85738143 |
| 6 | -7.56037980  | 1.47196641  | -0.67626034 | 6 | 10.45413007  | 1.87374958  | -2.17199431 |
| 6 | -7.09158291  | 2.66022554  | 1.43501154  | 1 | 13.19942626  | -3.17020856 | 2.10109929  |
| 6 | -6.74045396  | 0.37612708  | -0.24848210 | 1 | 10.66114138  | -0.22633000 | -2.61850190 |
| 6 | -7.22381433  | 3.87036577  | 2.27090663  | 1 | 13.03508423  | -0.81744469 | 1.34764213  |
| 6 | -6.36252192  | 1.53635552  | 1.91898766  | 1 | 10.00539366  | 2.10991803  | -3.14567841 |
| 6 | -6.27043101  | 0.35295866  | 1.11379436  | 6 | 4.58264368   | -5.10307915 | 0.99761856  |
| 8 | -7.89909873  | 4.85825570  | 1.94139871  | 6 | 6.80250134   | -6.32098067 | 1.38899920  |
| 7 | -6.53204001  | 3.87060707  | 3.50258715  | 6 | 6.07186963   | -4.95586080 | 1.33496879  |
| 6 | -5.67520789  | 1.58851520  | 3.16605980  | 1 | 6.32662027   | -6.96092565 | 2.16112724  |
| 6 | -5.64385668  | -0.82032931 | 1.66189806  | 1 | 6.68089714   | -6.82872888 | 0.41063415  |
| 6 | -5.71787659  | 2.82058772  | 3.98006323  | 1 | 4.47430316   | -5.75377219 | 0.10907506  |
| 6 | -4.85529472  | 0.51769867  | 3.54995855  | 1 | 4.04591910   | -5.59888916 | 1.83256078  |
| 6 | -4.78200634  | -0.67832388 | 2.79757898  | 1 | 6.57051104   | -4.32187136 | 0.57103753  |
| 8 | -5.06824964  | 2.96031130  | 5.02908908  | 1 | 6.19851684   | -4.43122463 | 2.30484034  |
| 6 | -6.28930109  | -0.72766906 | -1.10798641 | 1 | 9.45229759   | -6.31139002 | -0.25072908 |
| 6 | -5.89824927  | -2.08484232 | 0.96654136  | 1 | 4.40148958   | -3.28140210 | -0.18968932 |
| 6 | -6.02309619  | -0.62346573 | -2.51401792 | 1 | 10.27221072  | 4.52688453  | -2.61723749 |
| 6 | -6.07226883  | -1.99687418 | -0.45997590 | 6 | -9.96811767  | -6.68725373 | -1.69816385 |
| 6 | -5.91047302  | -3.36974621 | 1.60006227  | 1 | -10.31225886 | -7.18899777 | -0.78309069 |
| 6 | -5.88279616  | -1.81633705 | -3.26748471 | 6 | -3.54691310  | 6.76263992  | 1.77702906  |
| 6 | -5.95473705  | -3.18472144 | -1.25242156 | 1 | -3.63408614  | 7.68558163  | 1.18208155  |
| 6 | -5.88833336  | -4.52270908 | 0.78393150  | 7 | -11.23513332 | -2.11271022 | 0.73711522  |
| 6 | -5.89635197  | -3.07939891 | -2.67057586 | 7 | -11.31310904 | -0.93097648 | 1.33324403  |
| 6 | -5.85351403  | -4.45016901 | -0.61378196 | 1 | -10.40003908 | 1.99329138  | -1.15378264 |
| 6 | -5.71352038  | -4.28603294 | -3.49769461 | 1 | -8.27403172  | 3.29231665  | -0.97139542 |
| 6 | -5.72645389  | -5.68036319 | -1.41739579 | 6 | -11.77223919 | -2.03280875 | -0.52241866 |
| 8 | -5.57317037  | -4.24776490 | -4.72940508 | 6 | -10.06595045 | 2.37028476  | -0.17502769 |
| 7 | -5.67747280  | -5.52508180 | -2.81391393 | 6 | -8.86924711  | 3.09395764  | -0.07095979 |
| 8 | -5.64420156  | -6.81710448 | -0.91828122 | 1 | -7.42647346  | 5.45227449  | -0.55050396 |
| 1 | -4.21778454  | 0.63548398  | 4.43149996  | 7 | -11.91886970 | -0.08471799 | 0.47298196  |
| 1 | -5.88246156  | -5.50871311 | 1.25683259  | 1 | -5.35996980  | 6.80563064  | -0.29809304 |
| 1 | -5.71181797  | -1.76257771 | -4.34938642 | 1 | -12.79048292 | 1.76153553  | 0.08363883  |
| 1 | -8.31029074  | 3.44251399  | -0.15641389 | 6 | -6.77781858  | 5.28268864  | 0.32132258  |
| 6 | -8.28492117  | 1.45453547  | -1.96652472 | 6 | -5.61061677  | 6.05418001  | 0.46109656  |
| 6 | -8.92339962  | 0.27331697  | -2.42386324 | 6 | -12.13738231 | 1.31935338  | 0.85831157  |
| 6 | -8.38207702  | 2.60446869  | -2.79384911 | 6 | -12.21849857 | -0.71764356 | -0.69956032 |
| 6 | -9.56315990  | 0.21461310  | -3.66441401 | 6 | -10.83218152 | 2.08521049  | 0.97604638  |
| 6 | -9.02659080  | 2.56080219  | -4.03150099 | 6 | -8.39348855  | 3.53890727  | 1.18946829  |
| 6 | -9.60422711  | 1.35356512  | -4.52265574 | 6 | -7.13412429  | 4.32110397  | 1.30207640  |
| 1 | -8.92212470  | -0.62365849 | -1.79141125 | 6 | -4.76896384  | 5.88897291  | 1.58038128  |
| 1 | -7.88537519  | 3.53608177  | -2.49063501 | 1 | -12.68755602 | 1.32436358  | 1.81823326  |
| 1 | -10.04898344 | -0.72283932 | -3.95153580 | 1 | -12.70351426 | -0.20496138 | -1.53388786 |
| 1 | -9.03660733  | 3.46450498  | -4.64819275 | 6 | -10.35963799 | 2.50913042  | 2.23389222  |
| 6 | -5.74989952  | 0.65933913  | -3.19012680 | 6 | -6.26708722  | 4.14341080  | 2.40958307  |
| 6 | -5.03719716  | 1.69712863  | -2.52730474 | 6 | -9.15579159  | 3.22378814  | 2.34141785  |

|   |              |             |             |   |              |             |             |
|---|--------------|-------------|-------------|---|--------------|-------------|-------------|
| 6 | -6.06765113  | 0.87365775  | -4.55735772 | 6 | -5.10372918  | 4.91283435  | 2.54290242  |
| 6 | -4.65772126  | 2.86998363  | -3.17618465 | 1 | -10.94557929 | 2.29100228  | 3.13853020  |
| 6 | -5.68832745  | 2.03917185  | -5.22841566 | 1 | -6.50417866  | 3.38546424  | 3.16663643  |
| 6 | -4.96364350  | 3.07708796  | -4.56040100 | 1 | -4.43416571  | 4.76306610  | 3.39880485  |
| 1 | -4.75356350  | 1.56515437  | -1.47646251 | 1 | -8.81317940  | 3.55863673  | 3.33037247  |
| 1 | -6.66671831  | 0.12367726  | -5.09262220 | 6 | -10.88526796 | -4.35934468 | -1.04554536 |
| 1 | -4.08556607  | 3.61939427  | -2.62176149 | 6 | -11.81547298 | -3.20720461 | -1.46415016 |
| 1 | -5.98695619  | 2.17787399  | -6.27182572 | 6 | -10.89109724 | -5.51083172 | -2.06124101 |
| 6 | -5.96946877  | -3.56674299 | 3.06853012  | 1 | -9.85572179  | -3.96075510 | -0.93710061 |
| 6 | -5.27551953  | -4.63315744 | 3.69420674  | 1 | -11.17995189 | -4.73635290 | -0.04827879 |
| 6 | -6.77743726  | -2.75516585 | 3.89904517  | 1 | -10.60961958 | -5.12868789 | -3.06079304 |
| 6 | -5.40424103  | -4.89786497 | 5.06025283  | 1 | -11.91818475 | -5.92020134 | -2.17107629 |
| 6 | -6.91310255  | -2.99944950 | 5.27158931  | 1 | -11.54563514 | -2.85742023 | -2.48148618 |
| 6 | -6.23548018  | -4.09316337 | 5.89130979  | 1 | -12.86034311 | -3.57848901 | -1.55319077 |
| 1 | -4.59480914  | -5.25351370 | 3.09542341  | 1 | -9.94932961  | -7.42762438 | -2.51469896 |
| 1 | -7.34074269  | -1.92493249 | 3.45906791  | 1 | -3.44109347  | 7.04092778  | 2.83786146  |
| 1 | -4.85540406  | -5.74065762 | 5.48969746  |   |              |             |             |
| 1 | -7.57285869  | -2.34043040 | 5.84670063  |   |              |             |             |
| 6 | -3.71917559  | -1.66527684 | 3.09659154  |   |              |             |             |
| 6 | -3.24331675  | -1.92171363 | 4.40838229  |   |              |             |             |
| 6 | -3.05665695  | -2.32083928 | 2.02941759  |   |              |             |             |
| 6 | -2.16363449  | -2.78098133 | 4.63529001  |   |              |             |             |
| 6 | -1.98407343  | -3.18614787 | 2.24506776  |   |              |             |             |
| 6 | -1.49739484  | -3.42611467 | 3.55632789  |   |              |             |             |
| 1 | -3.75169248  | -1.47180836 | 5.27104478  |   |              |             |             |
| 1 | -3.35502804  | -2.11879892 | 0.99473349  |   |              |             |             |
| 1 | -1.48850031  | -3.62350312 | 1.37383226  |   |              |             |             |
| 7 | -6.39601214  | -4.37985741 | 7.25310947  |   |              |             |             |
| 7 | -4.56124173  | 4.21039881  | -5.22556842 |   |              |             |             |
| 7 | -10.16026257 | 1.28101230  | -5.80690955 |   |              |             |             |
| 6 | -3.86630696  | 5.28005485  | -4.51422429 |   |              |             |             |
| 1 | -4.39270524  | 5.53695460  | -3.57546372 |   |              |             |             |
| 1 | -2.81546099  | 5.01516503  | -4.25703906 |   |              |             |             |
| 1 | -3.86069496  | 6.18966981  | -5.13898161 |   |              |             |             |
| 6 | -4.60848791  | 4.24917453  | -6.68523736 |   |              |             |             |
| 1 | -4.10869485  | 5.16691960  | -7.03954769 |   |              |             |             |
| 1 | -4.08000662  | 3.37816297  | -7.12757804 |   |              |             |             |
| 1 | -5.65065877  | 4.24434542  | -7.07089702 |   |              |             |             |
| 6 | -10.70360151 | -0.00512782 | -6.25011711 |   |              |             |             |
| 1 | -11.58772524 | -0.32954164 | -5.65395011 |   |              |             |             |
| 1 | -10.99815838 | 0.07179511  | -7.31247451 |   |              |             |             |
| 1 | -9.93640986  | -0.79719429 | -6.15891560 |   |              |             |             |
| 6 | -10.84656955 | 2.46804028  | -6.34364572 |   |              |             |             |
| 1 | -11.77926671 | 2.70571843  | -5.78397412 |   |              |             |             |
| 1 | -10.19634936 | 3.35970894  | -6.30354881 |   |              |             |             |
| 1 | -11.11535278 | 2.29023519  | -7.40117409 |   |              |             |             |
| 6 | -7.45838016  | -3.67723108 | 7.97856335  |   |              |             |             |
| 1 | -7.28157249  | -2.58411696 | 7.98121461  |   |              |             |             |
| 1 | -8.46741136  | -3.85386769 | 7.53976167  |   |              |             |             |
| 1 | -7.46978596  | -4.01973105 | 9.02695857  |   |              |             |             |
| 6 | -6.09000189  | -5.74334015 | 7.70978510  |   |              |             |             |
| 1 | -5.01508132  | -5.98332976 | 7.58556162  |   |              |             |             |
| 1 | -6.33735195  | -5.82779019 | 8.78371645  |   |              |             |             |
| 1 | -6.66456784  | -6.51609534 | 7.14824390  |   |              |             |             |
| 7 | -0.39292203  | -4.28166535 | 3.78982956  |   |              |             |             |
| 6 | 0.68626456   | -3.73174085 | 4.63385163  |   |              |             |             |

|   |             |              |             |
|---|-------------|--------------|-------------|
| 1 | 1.44924683  | -4.51002966  | 4.81805347  |
| 1 | 1.19654375  | -2.86802941  | 4.14918645  |
| 1 | 0.30047882  | -3.39243042  | 5.61218503  |
| 6 | 0.10037172  | -5.05093512  | 2.64025738  |
| 1 | 0.55909026  | -4.41159179  | 1.85351050  |
| 1 | 0.88177723  | -5.75042492  | 2.98311243  |
| 1 | -0.73077895 | -5.62401472  | 2.18697694  |
| 1 | -1.84378591 | -2.96924146  | 5.66777240  |
| 6 | 5.51851825  | -6.09547246  | 3.26323566  |
| 1 | 4.46606349  | -6.38297958  | 3.41410829  |
| 6 | -5.49636360 | -6.75570861  | -3.61922681 |
| 1 | -5.84146650 | -6.51730882  | -4.63707798 |
| 7 | 6.30820075  | -7.84167852  | -2.25398812 |
| 7 | 5.74026923  | -8.30180218  | -3.35892507 |
| 1 | 3.29291777  | -7.45430233  | -3.81362509 |
| 1 | 0.96389888  | -6.63841057  | -3.70941595 |
| 6 | 5.97194379  | -8.64909265  | -1.19456248 |
| 6 | 2.46876241  | -8.17874874  | -3.87070890 |
| 6 | 1.14424128  | -7.71822540  | -3.81348889 |
| 1 | -2.07519983 | -9.84571870  | -2.61772342 |
| 7 | 5.03185520  | -9.40365880  | -3.02282376 |
| 1 | -4.44321597 | -9.05943615  | -2.53798613 |
| 1 | 4.64148847  | -9.88727907  | -5.00352686 |
| 6 | -2.35118343 | -8.90247434  | -3.10939305 |
| 6 | -3.68163381 | -8.45494461  | -3.05132742 |
| 6 | 4.17989894  | -10.06781318 | -4.01292691 |
| 6 | 5.14063201  | -9.65748618  | -1.68629897 |
| 6 | 2.74660458  | -9.56143645  | -3.95843657 |
| 6 | 0.05089185  | -8.62225006  | -3.84703738 |
| 6 | -1.35251212 | -8.14066122  | -3.76487204 |
| 6 | -4.05585411 | -7.23169469  | -3.64850237 |
| 1 | 4.21896788  | -11.15706556 | -3.83058444 |
| 1 | 4.64401406  | -10.50583734 | -1.21102709 |
| 6 | 1.66851915  | -10.46736005 | -3.99598410 |
| 6 | -1.73141560 | -6.90491232  | -4.34557627 |
| 6 | 0.34063303  | -10.00652672 | -3.95145688 |
| 6 | -3.05909426 | -6.45691033  | -4.28496116 |
| 1 | 1.86295799  | -11.54744668 | -4.06848694 |
| 1 | -0.99476590 | -6.30934775  | -4.90190274 |
| 1 | -3.32667820 | -5.50157789  | -4.75446560 |
| 1 | -0.47890222 | -10.73516373 | -4.01817946 |
| 6 | 5.67280465  | -7.29541828  | 0.96303426  |
| 6 | 6.44977340  | -8.39626771  | 0.20265699  |
| 6 | 6.23997561  | -7.12119084  | 2.37649027  |
| 1 | 5.73827480  | -6.33948697  | 0.40334182  |
| 1 | 4.59749059  | -7.56094680  | 1.01193071  |
| 1 | 7.31580612  | -6.87153728  | 2.31768870  |
| 1 | 6.18063778  | -8.09336021  | 2.90998199  |
| 1 | 7.52655596  | -8.12964438  | 0.17360271  |
| 1 | 6.38512402  | -9.34300522  | 0.77339057  |
| 1 | 6.02419893  | -6.05125185  | 4.24493849  |
| 1 | -6.15440835 | -7.53335402  | -3.20556011 |
| 6 | 5.43049172  | 7.72765879   | -0.40940650 |
| 1 | 6.46366707  | 7.98026708   | -0.69212261 |
| 6 | -6.63077828 | 5.09634250   | 4.33655789  |
| 1 | -6.33459368 | 4.79029002   | 5.35314455  |

|   |             |             |             |
|---|-------------|-------------|-------------|
| 7 | 1.32492403  | 9.25827671  | -2.40527127 |
| 7 | 0.25438486  | 9.63786465  | -1.72326296 |
| 1 | 0.19081910  | 9.91735120  | 1.49386163  |
| 6 | 2.28810565  | 10.23395772 | -2.34117964 |
| 1 | -1.27520494 | 8.48722051  | 2.86426769  |
| 6 | -0.89600002 | 9.96056128  | 1.34117323  |
| 7 | 0.52632741  | 10.85539460 | -1.19715918 |
| 6 | -1.73458922 | 9.14229055  | 2.11270834  |
| 1 | 0.01642404  | 12.41925171 | 0.06022043  |
| 1 | -5.90449875 | 9.20164829  | 2.15155339  |
| 6 | -0.51790810 | 11.64926744 | -0.52912713 |
| 6 | 1.77834229  | 11.26536844 | -1.54881943 |
| 1 | -7.37162071 | 7.44765353  | 3.11601231  |
| 6 | -5.44388792 | 8.32607524  | 2.62618735  |
| 6 | -1.42469123 | 10.81054504 | 0.34697210  |
| 6 | -6.27870382 | 7.34544482  | 3.18594257  |
| 6 | -3.14384833 | 9.13870879  | 1.91701437  |
| 6 | -4.03194671 | 8.18235833  | 2.63826734  |
| 1 | -1.10789312 | 12.16819104 | -1.31012525 |
| 6 | -5.73372200 | 6.20550741  | 3.81714875  |
| 6 | -2.82288142 | 10.85298574 | 0.17719794  |
| 6 | -3.66523942 | 10.03956227 | 0.95483894  |
| 6 | -3.49629896 | 7.04836763  | 3.30365228  |
| 6 | -4.32827912 | 6.08648116  | 3.89446799  |
| 1 | -3.25637742 | 11.49629099 | -0.60421353 |
| 1 | -2.41418907 | 6.87454741  | 3.32959029  |
| 1 | -4.74333611 | 10.07632264 | 0.76137879  |
| 1 | -3.88131352 | 5.21514506  | 4.39290536  |
| 6 | 4.46519147  | 8.11869369  | -1.53855795 |
| 6 | 3.63937101  | 10.08911448 | -2.98134647 |
| 6 | 4.71277710  | 9.56457999  | -1.99770270 |
| 1 | 3.96179381  | 11.07057974 | -3.38196848 |
| 1 | 3.55694573  | 9.39572138  | -3.84391924 |
| 1 | 3.42276634  | 7.99924121  | -1.18583236 |
| 1 | 4.59570539  | 7.42902772  | -2.39736156 |
| 1 | 4.73352933  | 10.23815339 | -1.11352131 |
| 1 | 5.70737958  | 9.63336542  | -2.48809420 |
| 1 | 2.19882198  | 12.21005803 | -1.20287645 |
| 1 | 5.17904264  | 8.27808986  | 0.51518939  |
| 1 | -7.68409889 | 5.41967928  | 4.34802841  |

### MC-PDI1 $\supset$ C60

QM1//QM2: BLYP-D3(BJ)/def2-SVP//GFN2-xTB

Only solute complex shown

| Atom | X          | Y          | Z          |
|------|------------|------------|------------|
| 6    | 3.57229967 | 6.09369436 | 3.31840762 |
| 6    | 1.01948552 | 5.70035419 | 2.01178996 |
| 6    | 4.91955821 | 6.12748080 | 3.89031118 |
| 6    | 2.50433229 | 5.44985265 | 4.01357839 |
| 6    | 1.19975661 | 5.34542886 | 3.39400965 |
| 8    | 5.89590202 | 6.63198965 | 3.29831030 |
| 7    | 5.09974530 | 5.54223331 | 5.15743237 |
| 6    | 2.73249954 | 4.89184657 | 5.30945070 |
| 6    | 0.06365992 | 4.86037790 | 4.13578734 |
| 6    | 4.07215792 | 4.93546043 | 5.90865049 |

### MC-PDI2 $\supset$ C60

QM1//QM2: BLYP-D3(BJ)/def2-SVP//GFN2-xTB

Only solute complex shown

| Atom | X           | Y          | Z           |
|------|-------------|------------|-------------|
| 6    | -7.16270468 | 3.96076847 | 0.80867252  |
| 6    | -6.75585196 | 3.45463641 | -0.43949900 |
| 6    | -7.22242998 | 3.13751582 | 1.93690789  |
| 6    | -6.44564373 | 2.09328595 | -0.61012474 |
| 1    | -6.74132409 | 4.12713212 | -1.30259359 |
| 6    | -7.69374742 | 3.69330622 | 3.22321525  |
| 6    | -6.89400266 | 1.74752168 | 1.82614986  |
| 6    | -6.60340755 | 1.20637818 | 0.51921142  |
| 8    | -8.06737194 | 4.87334808 | 3.34866090  |
| 7    | -7.75316993 | 2.81290583 | 4.30574169  |



|   |             |             |             |   |             |             |             |
|---|-------------|-------------|-------------|---|-------------|-------------|-------------|
| 8 | 4.33951374  | 4.44621226  | 7.02694320  | 6 | -6.89142796 | 0.90845410  | 2.96813385  |
| 6 | -0.18621067 | 5.20781801  | 1.34547940  | 6 | -6.56596067 | -0.20452969 | 0.34631713  |
| 6 | -1.26781611 | 5.12685924  | 3.57067259  | 6 | -7.39605231 | 1.44019971  | 4.26050345  |
| 6 | -1.38701825 | 5.12160747  | 2.13302050  | 6 | -6.45835888 | -0.45746628 | 2.83467322  |
| 6 | -2.68125422 | 5.05799223  | 1.48402175  | 6 | -6.37074294 | -1.04386151 | 1.50278089  |
| 6 | -2.76778671 | 4.93807920  | 0.06185253  | 8 | -7.56121424 | 0.74569250  | 5.27211497  |
| 6 | -3.87342163 | 5.12286163  | 2.26783036  | 6 | -6.03777973 | 1.51948845  | -1.89468933 |
| 6 | -4.07043235 | 4.84860441  | -0.59721105 | 6 | -6.74483901 | -0.69934619 | -1.01854657 |
| 6 | -5.18827426 | 5.09492267  | 1.62260783  | 6 | -5.33758518 | 2.24263068  | -2.92163227 |
| 8 | -4.21305203 | 4.66086446  | -1.82246320 | 6 | -6.37944622 | 0.15920500  | -2.12228349 |
| 7 | -5.21275489 | 4.97391656  | 0.22136233  | 6 | -7.29058152 | -1.96422693 | -1.30461080 |
| 8 | -6.26481720 | 5.19434977  | 2.25187539  | 6 | -5.24357342 | 1.68812186  | -4.26686287 |
| 6 | -2.45523362 | 5.36963691  | 4.29834855  | 6 | -6.37872994 | -0.35828459 | -3.47129243 |
| 6 | -3.76096518 | 5.32641898  | 3.67027590  | 6 | -7.39480241 | -2.42665450 | -2.62607622 |
| 7 | -2.64109658 | 5.66742767  | 5.65368314  | 6 | -5.86857832 | 0.42083158  | -4.54449516 |
| 6 | -4.72050293 | 5.53911930  | 4.70727388  | 6 | -6.92002123 | -1.66616574 | -3.69944788 |
| 6 | -4.02329969 | 5.75271444  | 5.90091306  | 6 | -5.94696914 | -0.13021118 | -5.91778681 |
| 1 | -5.80348684 | 5.50470994  | 4.59952550  | 6 | -6.98996717 | -2.23324121 | -5.05984451 |
| 6 | 0.34547232  | 4.19701350  | 5.35034812  | 8 | -5.63122841 | 0.49049070  | -6.94514246 |
| 6 | 1.65877545  | 4.22855557  | 5.96537648  | 7 | -6.40034673 | -1.46765890 | -6.07126064 |
| 7 | -0.49083454 | 3.42141244  | 6.15978826  | 8 | -7.52888760 | -3.32505742 | -5.31159546 |
| 6 | 1.54968581  | 3.50273155  | 7.19257994  | 1 | -7.82347752 | -3.41196279 | -2.82751833 |
| 6 | 0.24647933  | 3.00686269  | 7.28696975  | 1 | -7.43248079 | 5.01897076  | 0.89486891  |
| 1 | 2.32840101  | 3.36992555  | 7.94199559  | 6 | -4.47647981 | 2.41532989  | -5.23699343 |
| 6 | 2.02908435  | 6.48948422  | 1.41678476  | 6 | -3.82464649 | 3.59413691  | -4.91069004 |
| 6 | 3.30983209  | 6.69538743  | 2.05746359  | 1 | -4.38253387 | 1.99736535  | -6.24020512 |
| 7 | 2.03252811  | 7.19321141  | 0.20590932  | 1 | -3.22540922 | 4.11508949  | -5.66857128 |
| 6 | 4.08299910  | 7.51613041  | 1.17648139  | 6 | -4.62285945 | 3.44818843  | -2.62452406 |
| 6 | 3.29629232  | 7.80018154  | 0.05855241  | 6 | -3.88239600 | 4.11155526  | -3.58986179 |
| 1 | 5.10886453  | 7.85041965  | 1.32507360  | 1 | -4.59867145 | 3.80509106  | -1.59108786 |
| 6 | -0.29558245 | 4.88436709  | -0.02287902 | 1 | -3.31698986 | 5.01707736  | -3.33099847 |
| 6 | -1.57181521 | 4.82305421  | -0.69493135 | 6 | -5.97951834 | -2.41825481 | 1.39762560  |
| 7 | 0.70838396  | 4.63662611  | -0.96312921 | 6 | -5.65236415 | -3.17427263 | 2.51516991  |
| 6 | -1.28751181 | 4.63856316  | -2.08221674 | 1 | -5.84977377 | -2.86633538 | 0.41020844  |
| 6 | 0.10067795  | 4.52198714  | -2.23244969 | 1 | -5.30638257 | -4.20881431 | 2.38911843  |
| 1 | -2.01914245 | 4.64126158  | -2.88692083 | 6 | -6.08800483 | -1.26374586 | 3.95935240  |
| 6 | 0.83129269  | 4.41948623  | -3.50314181 | 6 | -5.69294534 | -2.58582294 | 3.80737318  |
| 6 | 2.19926306  | 4.77154840  | -3.64862837 | 1 | -6.09602654 | -0.80278947 | 4.94661312  |
| 6 | 0.11712274  | 4.04712716  | -4.67561484 | 1 | -5.38347319 | -3.16711489 | 4.68768445  |
| 6 | 2.81696606  | 4.75297561  | -4.91032931 | 1 | -7.66672491 | -2.58448012 | -0.48746655 |
| 1 | 2.78388167  | 5.08132526  | -2.77728831 | 6 | 6.56048454  | 0.26551227  | -0.99646712 |
| 6 | 0.73582258  | 4.03566264  | -5.93337491 | 6 | 6.07163187  | 1.47051366  | -0.46378757 |
| 1 | -0.94420824 | 3.78287829  | -4.59910728 | 6 | 6.39922183  | -0.94851534 | -0.32312603 |
| 6 | 2.09360421  | 4.38954817  | -6.05802249 | 6 | 5.39654502  | 1.49808449  | 0.77072500  |
| 1 | 3.87418693  | 5.02899049  | -5.00331094 | 1 | 6.24657040  | 2.39941536  | -1.01353155 |
| 1 | 0.15825353  | 3.75801733  | -6.82699835 | 6 | 6.86298368  | -2.19637464 | -0.96651460 |
| 1 | 2.57423797  | 4.38855100  | -7.04601970 | 6 | 5.78703009  | -0.97303560 | 0.97060888  |
| 6 | 3.71510262  | 8.53075642  | -1.14507276 | 6 | 5.32924890  | 0.27427558  | 1.53784422  |
| 6 | 4.72474117  | 9.52931742  | -1.05047213 | 8 | 7.30041541  | -2.24144238 | -2.12536149 |
| 6 | 3.20573967  | 8.20513012  | -2.43018796 | 7 | 6.79735788  | -3.35190460 | -0.17400894 |
| 6 | 5.19929736  | 10.18183080 | -2.19950095 | 6 | 5.60695170  | -2.19566114 | 1.67014143  |
| 1 | 5.14993973  | 9.78938860  | -0.07038261 | 6 | 4.81430486  | 0.28774495  | 2.86101369  |
| 6 | 3.68572982  | 8.85983513  | -3.57759020 | 6 | 6.20084330  | -3.43467062 | 1.10895242  |
| 1 | 2.45543234  | 7.41517509  | -2.54111063 | 6 | 4.79713314  | -2.21365024 | 2.86324416  |
| 6 | 4.68087213  | 9.85369113  | -3.46904869 | 6 | 4.37538939  | -0.94931660 | 3.44848303  |
| 1 | 5.97751711  | 10.95166601 | -2.10120864 | 8 | 6.19207285  | -4.53193233 | 1.68880850  |

|   |             |             |             |   |             |             |             |
|---|-------------|-------------|-------------|---|-------------|-------------|-------------|
| 1 | 3.27967105  | 8.59337532  | -4.56344527 | 6 | 4.79079561  | 2.70944839  | 1.33137832  |
| 1 | 5.03503836  | 10.37958932 | -4.36785879 | 6 | 4.76483424  | 1.57673316  | 3.54607297  |
| 6 | -0.31614516 | 2.20494758  | 8.38224867  | 6 | 4.34597647  | 3.83351394  | 0.54933462  |
| 6 | 0.54453615  | 1.37066527  | 9.14563868  | 6 | 4.67876929  | 2.77574034  | 2.74828370  |
| 6 | -1.68167034 | 2.28907963  | 8.76563116  | 6 | 4.86825045  | 1.69013372  | 4.94586720  |
| 6 | 0.06336625  | 0.66233942  | 10.25879182 | 6 | 4.06303240  | 5.10896274  | 1.20312683  |
| 1 | 1.59848419  | 1.27527372  | 8.85551873  | 6 | 4.50730999  | 4.05458409  | 3.39396809  |
| 6 | -2.16234945 | 1.57880050  | 9.87822240  | 6 | 4.84162130  | 2.94917195  | 5.56730732  |
| 1 | -2.36740745 | 2.94882710  | 8.22233408  | 6 | 4.22880439  | 5.22141104  | 2.63170311  |
| 6 | -1.29304176 | 0.76631390  | 10.63287360 | 6 | 4.63859971  | 4.11372421  | 4.81971103  |
| 1 | 0.75052139  | 0.02733412  | 10.83647439 | 6 | 4.05655708  | 6.51228914  | 3.35090063  |
| 1 | -3.21243511 | 1.68957385  | 10.18399399 | 6 | 4.60614908  | 5.40965438  | 5.52261279  |
| 1 | -1.66761276 | 0.24414454  | 11.52649248 | 8 | 3.65478574  | 7.56813401  | 2.84133147  |
| 6 | -4.61433532 | 5.96344436  | 7.22808485  | 7 | 4.37552590  | 6.53681100  | 4.73217923  |
| 6 | -5.92152143 | 6.51867759  | 7.32568361  | 8 | 4.75493826  | 5.51449194  | 6.75335600  |
| 6 | -3.97688681 | 5.54035198  | 8.42201935  | 1 | 4.98682488  | 3.02377665  | 6.65166377  |
| 6 | -6.56713300 | 6.62270862  | 8.56633230  | 1 | 7.06581541  | 0.27085909  | -1.96865677 |
| 1 | -6.43358353 | 6.86808381  | 6.41821353  | 6 | 3.63928284  | 6.20222491  | 0.37569125  |
| 6 | -4.62432406 | 5.65247088  | 9.66264146  | 6 | 3.45946528  | 6.05897092  | -0.99167753 |
| 1 | -2.98039472 | 5.08882473  | 8.38892879  | 1 | 3.44339977  | 7.16340515  | 0.84765925  |
| 6 | -5.92286815 | 6.19047662  | 9.74254190  | 1 | 3.13000244  | 6.92885386  | -1.57670307 |
| 1 | -7.58371695 | 7.03748238  | 8.60753493  | 6 | 4.09356040  | 3.71953317  | -0.85554623 |
| 1 | -4.10217318 | 5.29062944  | 10.55945786 | 6 | 3.66004329  | 4.79802338  | -1.61177372 |
| 1 | -6.43976158 | 6.27320902  | 10.70885713 | 1 | 4.19136872  | 2.74342062  | -1.33438700 |
| 6 | -1.67052532 | 2.70569796  | 5.65071893  | 1 | 3.45668612  | 4.66817406  | -2.68306948 |
| 1 | -2.62123363 | 3.14050186  | 6.00594580  | 6 | 3.43229669  | -0.96172435 | 4.52490777  |
| 1 | -1.65682144 | 2.73784390  | 4.55149151  | 6 | 2.96317762  | -2.15236799 | 5.05880394  |
| 1 | -1.60052102 | 1.65229310  | 5.96404507  | 1 | 3.02235337  | -0.00867256 | 4.87751872  |
| 6 | -1.61482716 | 6.28487855  | 6.50745184  | 1 | 2.22048257  | -2.13593620 | 5.86737799  |
| 1 | -1.17106459 | 5.57407983  | 7.22413874  | 6 | 4.30543796  | -3.41885342 | 3.46329045  |
| 1 | -0.80744092 | 6.67842827  | 5.86972822  | 6 | 3.42249191  | -3.38915844 | 4.53313231  |
| 1 | -2.06540275 | 7.12096084  | 7.06829480  | 1 | 4.60819992  | -4.36991417 | 3.02779162  |
| 6 | 2.02228694  | 4.08624638  | -0.59322565 | 1 | 3.04568872  | -4.33379927 | 4.94987075  |
| 1 | 2.82036234  | 4.84937760  | -0.59992701 | 1 | 5.03041522  | 0.79640258  | 5.56013457  |
| 1 | 1.95563554  | 3.65442548  | 0.42041600  | 6 | -8.31798170 | 3.32509417  | 5.57294930  |
| 1 | 2.28525963  | 3.27449522  | -1.29133931 | 1 | -8.71017925 | 2.45225055  | 6.11316831  |
| 6 | 0.81446827  | 7.68718549  | -0.45940859 | 1 | -9.16980300 | 3.97902895  | 5.32069868  |
| 1 | 0.98474886  | 8.72337591  | -0.79563187 | 6 | 4.29515449  | 7.85595008  | 5.41491020  |
| 1 | 0.52392017  | 7.07725084  | -1.32996745 | 1 | 4.66920994  | 8.60932669  | 4.70307568  |
| 1 | -0.01568480 | 7.68034990  | 0.26603042  | 1 | 4.97476672  | 7.79162299  | 6.28138092  |
| 6 | 6.78052948  | -6.96732104 | -0.22191016 | 7 | -7.32459782 | 7.17954014  | 7.50167037  |
| 6 | 4.18551845  | -7.21458765 | 1.01805294  | 7 | -6.88764224 | 8.43167823  | 7.47836110  |
| 6 | 8.09120797  | -6.66417587 | -0.80710543 | 1 | -4.26506316 | 10.01797126 | 6.06379430  |
| 6 | 5.59280685  | -6.86973083 | -1.01361313 | 6 | -6.70490317 | 6.49314587  | 8.51887242  |
| 6 | 4.29634158  | -7.09475474 | -0.40901701 | 1 | -1.97712525 | 9.52867987  | 5.23706649  |
| 8 | 9.15609569  | -6.72136383 | -0.16288485 | 6 | -3.48535616 | 9.71437977  | 6.77633692  |
| 7 | 8.11468871  | -6.29922679 | -2.17111890 | 7 | -6.00091041 | 8.56651489  | 8.48842633  |
| 6 | 5.68261213  | -6.55568429 | -2.40268267 | 6 | -2.18943152 | 9.44543441  | 6.31233025  |
| 6 | 3.09798059  | -7.19841552 | -1.20369269 | 1 | -5.74827020 | 10.58507206 | 8.07515664  |
| 6 | 6.98687337  | -6.29049602 | -3.01988401 | 1 | 0.63122411  | 7.28628846  | 8.30342371  |
| 8 | 7.13313733  | -6.05075957 | -4.23527650 | 6 | -5.21568962 | 9.80241904  | 8.64491605  |
| 6 | 2.86784792  | -7.00127255 | 1.60264955  | 6 | -5.84934725 | 7.39015348  | 9.16299970  |
| 6 | 1.90467074  | -7.76302830 | -0.54669827 | 1 | 2.95729290  | 6.83429533  | 7.56538373  |
| 6 | 1.73561137  | -7.47681506 | 0.85822899  | 6 | 1.02992209  | 7.81410542  | 7.42753299  |
| 6 | 0.48546250  | -7.71946532 | 1.54808169  | 6 | -3.79609972 | 9.59866139  | 8.14783828  |
| 6 | 0.31142493  | -7.30379171 | 2.90752274  | 6 | 2.33800840  | 7.54523155  | 7.00827307  |

|   |             |              |             |   |             |             |             |
|---|-------------|--------------|-------------|---|-------------|-------------|-------------|
| 6 | -0.56867254 | -8.39531428  | 0.87117931  | 6 | -1.16522250 | 9.03729760  | 7.20621897  |
| 6 | -0.92371204 | -7.63094708  | 3.63005348  | 6 | 0.21503628  | 8.74251121  | 6.73253709  |
| 6 | -1.80866366 | -8.75372930  | 1.57972189  | 1 | -5.22064267 | 10.07401193 | 9.71670042  |
| 8 | -1.12792800 | -7.29621742  | 4.81374091  | 6 | 2.88220408  | 8.18583425  | 5.87003864  |
| 7 | -1.90021902 | -8.37169952  | 2.93824068  | 6 | -2.78624932 | 9.19856375  | 9.04496053  |
| 8 | -2.73469293 | -9.39112295  | 1.05825941  | 6 | -1.49437057 | 8.91861953  | 8.58039912  |
| 6 | 0.89850603  | -8.56423719  | -1.13887772 | 6 | 0.76837057  | 9.38949052  | 5.59977192  |
| 6 | -0.34564105 | -8.84987285  | -0.45126222 | 6 | 2.07699478  | 9.11165779  | 5.17219025  |
| 7 | 0.86669861  | -9.23536466  | -2.36935577 | 1 | -3.01672022 | 9.10300471  | 10.11600675 |
| 6 | -1.13322097 | -9.65204766  | -1.33388514 | 1 | 0.18203620  | 10.14710736 | 5.06136624  |
| 6 | -0.38149824 | -9.88657723  | -2.48416353 | 1 | -0.72131757 | 8.62136874  | 9.29870536  |
| 1 | -2.14530493 | -9.99963572  | -1.13626183 | 1 | 2.48508877  | 9.63775074  | 4.29924732  |
| 6 | 3.20936318  | -6.77610663  | -2.54946459 | 6 | -7.29670822 | 4.05662011  | 6.45818437  |
| 6 | 4.48616665  | -6.47052104  | -3.16217777 | 6 | -6.94272622 | 5.03724683  | 8.82600735  |
| 7 | 2.21446405  | -6.58232965  | -3.51463883 | 6 | -7.88741582 | 4.30743084  | 7.85583001  |
| 6 | 4.21663382  | -6.14199674  | -4.53254993 | 1 | -7.33805364 | 4.95740294  | 9.85913278  |
| 6 | 2.83351544  | -6.22759171  | -4.72732935 | 1 | -5.95720838 | 4.52344599  | 8.84322951  |
| 1 | 4.96513709  | -5.93601578  | -5.29912250 | 1 | -6.99398403 | 5.01146974  | 5.99038058  |
| 6 | 5.36274225  | -7.51543849  | 1.73183455  | 1 | -6.38099547 | 3.43755039  | 6.55314315  |
| 6 | 6.67010912  | -7.39094468  | 1.13087972  | 1 | -8.84778571 | 4.85521916  | 7.77052157  |
| 7 | 5.52260015  | -7.96481032  | 3.04920054  | 1 | -8.14664544 | 3.32879589  | 8.30631624  |
| 6 | 7.61829198  | -7.74604734  | 2.14839666  | 1 | -5.16909095 | 7.27720748  | 10.00930214 |
| 6 | 6.90003255  | -8.10389301  | 3.29676455  | 6 | -6.30890852 | -2.03239479 | -7.43759450 |
| 1 | 8.70300487  | -7.76714054  | 2.04928058  | 1 | -6.95791969 | -2.92065564 | -7.46365634 |
| 6 | 2.61912391  | -6.42893245  | 2.86569181  | 1 | -6.70201585 | -1.27911452 | -8.14158644 |
| 6 | 1.35760700  | -6.59116813  | 3.55055396  | 6 | 7.38279995  | -4.59692706 | -0.73624905 |
| 7 | 3.47501649  | -5.69225196  | 3.68678519  | 1 | 7.64520895  | -5.22034878 | 0.13218186  |
| 6 | 1.51046005  | -5.96772094  | 4.83262480  | 1 | 8.29881524  | -4.31478094 | -1.28166993 |
| 6 | 2.80380271  | -5.43257449  | 4.89965670  | 7 | -2.70572919 | -5.94119621 | -6.00211707 |
| 1 | 0.76242206  | -5.93264850  | 5.62351735  | 7 | -1.96860571 | -7.03436875 | -5.89805027 |
| 6 | 3.45303756  | -4.77885598  | 6.04319011  | 1 | 2.04739320  | -6.19957132 | -7.41568484 |
| 6 | 2.66410433  | -4.14300161  | 7.03844955  | 1 | 3.88440978  | -5.50082555 | -5.89256665 |
| 6 | 4.85875207  | -4.82018028  | 6.23191573  | 6 | -2.22966840 | -5.16044492 | -7.02636246 |
| 6 | 3.26272768  | -3.55618674  | 8.16377437  | 6 | 2.14906011  | -6.67080308 | -6.42692352 |
| 1 | 1.57319780  | -4.10589923  | 6.91940931  | 6 | 3.19236113  | -6.28931255 | -5.57264141 |
| 6 | 5.45521412  | -4.22471185  | 7.35278316  | 1 | 5.81886739  | -5.89093591 | -4.98225430 |
| 1 | 5.49611007  | -5.33832494  | 5.50957258  | 7 | -1.02102461 | -6.97795323 | -6.86203578 |
| 6 | 4.66365229  | -3.58267010  | 8.32238714  | 1 | 7.52176933  | -4.88774175 | -3.45274374 |
| 1 | 2.63118445  | -3.07322913  | 8.92373464  | 1 | -0.41163901 | -8.95396218 | -6.60675815 |
| 1 | 6.54623052  | -4.27281689  | 7.46844596  | 6 | 5.63908175  | -5.88660338 | -3.89863106 |
| 1 | 5.13383209  | -3.11764718  | 9.20144795  | 6 | 6.60173114  | -5.32719619 | -3.04529958 |
| 6 | 7.44726500  | -8.53112678  | 4.59214936  | 6 | 0.03862822  | -7.99480479 | -6.91853678 |
| 6 | 8.65922582  | -9.26776353  | 4.63003995  | 6 | -1.13625173 | -5.82663192 | -7.58654226 |
| 6 | 6.82700882  | -8.18593109  | 5.82104835  | 6 | 1.20104509  | -7.62914290 | -6.01544517 |
| 6 | 9.23042196  | -9.64252329  | 5.85470364  | 6 | 3.34005554  | -6.87492763 | -4.28642435 |
| 1 | 9.14089360  | -9.56320389  | 3.68844330  | 6 | 4.44104290  | -6.44240066 | -3.38440135 |
| 6 | 7.40232790  | -8.56572609  | 7.04440274  | 6 | 6.40942729  | -5.31651270 | -1.65030897 |
| 1 | 5.89805596  | -7.60360288  | 5.82570330  | 1 | 0.36421593  | -8.07416196 | -7.97223216 |
| 6 | 8.60935356  | -9.29090892  | 7.06821151  | 1 | -0.46499508 | -5.58196957 | -8.41271063 |
| 1 | 10.15529073 | -10.23658858 | 5.85426434  | 6 | 1.31497807  | -8.19066611 | -4.72774169 |
| 1 | 6.89485524  | -8.31346204  | 7.98657323  | 6 | 4.29556544  | -6.50384784 | -1.97422470 |
| 1 | 9.05379899  | -9.58120684  | 8.03054382  | 6 | 2.37592706  | -7.83266239 | -3.88102927 |
| 6 | 2.08982388  | -6.07884587  | -5.98548428 | 6 | 5.26089777  | -5.94475709 | -1.12436958 |
| 6 | 2.58409984  | -5.24661283  | -7.02592313 | 1 | 0.55981808  | -8.91445821 | -4.38931876 |
| 6 | 0.90426371  | -6.82040142  | -6.22746179 | 1 | 3.38532199  | -6.92825291 | -1.53050265 |
| 6 | 1.91031744  | -5.16283245  | -8.25406695 | 1 | 5.09913112  | -5.95260396 | -0.04155192 |

|   |             |              |             |   |             |             |             |
|---|-------------|--------------|-------------|---|-------------|-------------|-------------|
| 1 | 3.50031714  | -4.66078961  | -6.87163725 | 1 | 2.45378328  | -8.30621473 | -2.89423431 |
| 6 | 0.24087336  | -6.74379851  | -7.46172226 | 6 | -4.31209617 | -3.65384851 | -7.08070451 |
| 1 | 0.50469904  | -7.48491331  | -5.45763195 | 6 | -2.82350085 | -3.84249197 | -7.42744324 |
| 6 | 0.74042562  | -5.91450203  | -8.48459562 | 6 | -4.86093446 | -2.40751300 | -7.79182713 |
| 1 | 2.30090990  | -4.49861300  | -9.03565294 | 1 | -4.88175969 | -4.55317797 | -7.39073092 |
| 1 | -0.65918447 | -7.35448459  | -7.61597577 | 1 | -4.42752549 | -3.56168509 | -5.98143999 |
| 1 | 0.23343389  | -5.86836577  | -9.45798872 | 1 | -4.81060037 | -2.57247558 | -8.88774244 |
| 6 | -0.83730144 | -10.63018644 | -3.66581218 | 1 | -4.20187235 | -1.54381696 | -7.57489222 |
| 6 | -1.83650109 | -11.63379764 | -3.51051814 | 1 | -2.68252304 | -3.73005726 | -8.52105598 |
| 6 | -0.40453212 | -10.31113620 | -4.97865486 | 1 | -2.23258430 | -3.01737517 | -6.97485315 |
| 6 | -2.38682140 | -12.27592969 | -4.63204506 | 6 | -3.38264569 | -3.07878967 | -2.16962686 |
| 1 | -2.17618185 | -11.90961657 | -2.50282339 | 6 | -3.71416987 | -1.72043670 | -1.74117350 |
| 6 | -0.95899775 | -10.95526007 | -6.09573000 | 6 | -2.87895244 | -4.00435014 | -1.23263191 |
| 1 | 0.34035497  | -9.52726834  | -5.13508164 | 6 | -3.53477714 | -1.33769125 | -0.39875140 |
| 6 | -1.95251146 | -11.93865005 | -5.93246692 | 6 | -2.99159638 | -0.01744701 | -0.07285122 |
| 1 | -3.15691866 | -13.04922094 | -4.48886914 | 6 | -3.34429776 | -0.80070761 | -2.81865774 |
| 1 | -0.63060156 | -10.65822820 | -7.10046279 | 6 | -2.81278856 | 0.46574981  | -2.50954145 |
| 1 | -2.40069446 | -12.42402114 | -6.81036687 | 6 | -2.63063403 | 0.86351286  | -1.11109619 |
| 6 | 0.82167309  | -6.24625555  | -3.18322433 | 6 | -1.20858003 | -4.81515689 | -2.89751621 |
| 1 | 0.50047455  | -5.37417403  | -3.77641774 | 6 | -1.73414140 | -3.85053751 | -3.86851403 |
| 1 | 0.12128108  | -7.07676021  | -3.36638476 | 6 | -1.76908438 | -4.89014693 | -1.60416823 |
| 1 | 0.77336234  | -5.98251019  | -2.11834238 | 6 | -2.80048416 | -3.00035032 | -3.51406288 |
| 6 | 2.06203350  | -9.62826875  | -3.13013203 | 6 | -2.78245137 | -1.59065658 | -3.91764516 |
| 1 | 2.00100046  | -10.69950810 | -3.38712464 | 6 | -0.60461342 | -3.32632956 | -4.64037762 |
| 1 | 2.18595741  | -9.04641187  | -4.05819398 | 6 | -0.58607026 | -1.96974518 | -5.02714472 |
| 1 | 2.95651545  | -9.47011353  | -2.50822639 | 6 | -1.69490962 | -1.08490072 | -4.65752265 |
| 6 | 4.60281131  | -4.89934512  | 3.17266079  | 6 | 0.49523108  | -5.10933691 | -0.59918832 |
| 1 | 4.49050321  | -4.78073397  | 2.08288416  | 6 | 1.07782485  | -5.02842364 | -1.94290786 |
| 1 | 4.58605457  | -3.89931879  | 3.63825354  | 6 | -0.90208380 | -5.04052075 | -0.43223399 |
| 1 | 5.57668040  | -5.37719375  | 3.37412460  | 6 | 0.24353147  | -4.88804745 | -3.07108561 |
| 6 | 4.48211979  | -8.67696327  | 3.81057196  | 6 | 0.61757461  | -3.96859917 | -4.15104009 |
| 1 | 3.97365750  | -8.02218200  | 4.53904979  | 6 | 2.31629868  | -4.25356273 | -1.85092476 |
| 1 | 3.73000105  | -9.08233510  | 3.11214411  | 6 | 2.67964279  | -3.37364263 | -2.88891469 |
| 1 | 4.94689591  | -9.52059442  | 4.34825313  | 6 | 1.81306059  | -3.22524275 | -4.06004077 |
| 6 | 9.42507380  | -5.99237524  | -2.78773642 | 6 | -0.62843578 | -3.55533980 | 1.54983904  |
| 1 | 9.38663913  | -6.37014404  | -3.82257399 | 6 | 0.82514355  | -3.62671681 | 1.37711479  |
| 6 | 6.45626566  | 5.60182702   | 5.76021370  | 6 | -1.47312004 | -4.24739028 | 0.65917079  |
| 1 | 6.31938273  | 5.63061152   | 6.85137925  | 6 | 1.37574404  | -4.38966333 | 0.32332187  |
| 7 | 11.38393418 | -4.35705731  | 1.63104864  | 6 | 2.50232755  | -3.86083368 | -0.45143524 |
| 7 | 11.87277937 | -3.68192004  | 2.65658344  | 6 | 1.38103371  | -2.30734441 | 1.69795501  |
| 1 | 11.26151072 | -1.85143654  | 5.08423907  | 6 | 2.45782830  | -1.80315868 | 0.94554244  |
| 1 | 9.60313788  | -0.14106518  | 5.76361531  | 6 | 3.03605617  | -2.59545099 | -0.14278901 |
| 6 | 11.79700572 | -3.77582791  | 0.45657157  | 6 | -3.01468820 | -2.29837611 | 0.57274584  |
| 6 | 11.24838438 | -0.88004579  | 4.56865484  | 6 | -2.14398003 | -1.57758376 | 1.50234880  |
| 6 | 10.30380189 | 0.08848761   | 4.94980697  | 6 | -2.69194867 | -3.60700879 | 0.16373645  |
| 1 | 9.21249330  | 1.92117474   | 6.82109675  | 6 | -0.96846274 | -2.19431776 | 1.97613690  |
| 7 | 12.60355188 | -2.65763444  | 2.16336938  | 6 | 0.27437341  | -1.42182975 | 2.07085505  |
| 1 | 7.59680512  | 3.70808578   | 7.41254843  | 6 | -2.12538696 | -0.16496309 | 1.10294667  |
| 1 | 13.56694491 | -2.22153221  | 3.95658336  | 6 | -0.92800692 | 0.57780134  | 1.19261292  |
| 6 | 8.80042557  | 2.55352866   | 6.02209528  | 6 | 0.29370464  | -0.06301354 | 1.68569564  |
| 6 | 7.88354567  | 3.56999413   | 6.36021638  | 6 | 3.06309758  | -0.31765042 | -0.79559278 |
| 6 | 13.17655151 | -1.66168342  | 3.08614349  | 6 | 2.47897630  | -0.39613886 | 0.54541845  |
| 6 | 12.58300410 | -2.66856549  | 0.79394589  | 6 | 1.42118500  | 0.46005063  | 0.90924417  |
| 6 | 12.15986561 | -0.61914989  | 3.52183728  | 6 | 2.56573927  | 0.61143709  | -1.72754495 |
| 6 | 10.22860018 | 1.34309200   | 4.29456839  | 6 | 2.71424586  | -1.09207050 | -3.53983590 |
| 6 | 9.23162998  | 2.37749753   | 4.68305246  | 6 | 3.23584292  | -2.05694407 | -2.56606969 |

|   |              |             |              |   |             |             |             |
|---|--------------|-------------|--------------|---|-------------|-------------|-------------|
| 6 | 7.37507155   | 4.44836736  | 5.37825334   | 6 | 3.41182545  | -1.67506783 | -1.22152834 |
| 1 | 14.02788181  | -1.18472282 | 2.56759715   | 6 | 2.38600202  | 0.21698609  | -3.12806415 |
| 1 | 13.13114440  | -1.93826342 | 0.19258931   | 6 | 0.31549676  | 0.16124218  | -4.50683578 |
| 6 | 12.08959815  | 0.62234210  | 2.85965523   | 6 | 0.65612533  | -1.19934076 | -4.93339301 |
| 6 | 8.69576809   | 3.24743147  | 3.70241892   | 6 | 1.83244788  | -1.81479639 | -4.45991069 |
| 6 | 11.14318322  | 1.58731423  | 3.23865802   | 6 | 1.16528609  | 0.85861787  | -3.62294427 |
| 6 | 7.79636538   | 4.26282567  | 4.04258706   | 6 | -0.80577098 | 1.71295216  | -2.36036850 |
| 1 | 12.79393365  | 0.84518769  | 2.04428766   | 6 | -1.68662817 | 0.99353721  | -3.28265134 |
| 1 | 8.98094242   | 3.11887451  | 2.64992962   | 6 | -1.13751269 | 0.23225999  | -4.33431270 |
| 1 | 7.42198900   | 4.93726680  | 3.26805472   | 6 | 0.59212402  | 1.64546695  | -2.52522881 |
| 1 | 11.12753577  | 2.55323351  | 2.71760643   | 6 | 0.89967187  | 1.42596444  | -0.06220221 |
| 6 | 10.07577910  | -3.84320730 | -1.45166246  | 6 | -0.55393146 | 1.49879421  | 0.11160348  |
| 6 | 11.42668729  | -4.33937537 | -0.88405153  | 6 | -1.38964805 | 1.63682035  | -1.01810764 |
| 6 | 9.74663659   | -4.48445010 | -2.81371273  | 6 | 1.45916051  | 1.49637193  | -1.35469152 |
| 1 | 9.26291803   | -4.03683369 | -0.72353002  |   |             |             |             |
| 1 | 10.12270635  | -2.74231247 | -1.57722028  |   |             |             |             |
| 1 | 10.61158134  | -4.35212465 | -3.49810523  |   |             |             |             |
| 1 | 8.89478851   | -3.95641697 | -3.28239279  |   |             |             |             |
| 1 | 11.38785365  | -5.44059052 | -0.79116559  |   |             |             |             |
| 1 | 12.22726354  | -4.09100194 | -1.60697251  |   |             |             |             |
| 1 | 10.18764842  | -6.55113766 | -2.22165548  |   |             |             |             |
| 1 | 6.89821356   | 6.55802061  | 5.42981508   |   |             |             |             |
| 6 | -3.06166234  | -8.86056982 | 3.71861294   |   |             |             |             |
| 1 | -2.69791117  | -9.02671651 | 4.74709431   |   |             |             |             |
| 6 | -6.53832023  | 5.01942049  | -0.44957914  |   |             |             |             |
| 1 | -6.37451822  | 5.47582283  | -1.43831606  |   |             |             |             |
| 7 | -6.49908261  | -6.82081727 | 0.03243475   |   |             |             |             |
| 7 | -7.27741285  | -6.24570308 | -0.87843153  |   |             |             |             |
| 1 | -9.03033393  | -3.05031830 | -3.06076126  |   |             |             |             |
| 6 | -6.94424357  | -6.49008778 | 1.28817997   |   |             |             |             |
| 1 | -8.64030667  | -0.61198858 | -3.03396548  |   |             |             |             |
| 6 | -8.92372539  | -2.53573738 | -2.09493753  |   |             |             |             |
| 7 | -8.23781614  | -5.54842209 | -0.211175240 |   |             |             |             |
| 6 | -8.70343507  | -1.14960492 | -2.07926715  |   |             |             |             |
| 1 | -9.28366021  | -5.14533042 | -1.96141351  |   |             |             |             |
| 1 | -9.14884477  | 1.41280548  | 1.09976794   |   |             |             |             |
| 6 | -9.26294190  | -4.77067600 | -0.92333168  |   |             |             |             |
| 6 | -8.07399093  | -5.68219201 | 1.13316532   |   |             |             |             |
| 1 | -8.25592556  | 3.72294775  | 1.28078738   |   |             |             |             |
| 6 | -8.50018476  | 1.80284199  | 0.30276636   |   |             |             |             |
| 6 | -9.02595370  | -3.26835974 | -0.89391248  |   |             |             |             |
| 6 | -8.00129659  | 3.10986713  | 0.40709449   |   |             |             |             |
| 6 | -8.56657697  | -0.44808428 | -0.85634340  |   |             |             |             |
| 6 | -8.18427100  | 0.98640445  | -0.81159906  |   |             |             |             |
| 1 | -10.23218460 | -5.00951009 | -0.44399019  |   |             |             |             |
| 6 | -7.16840827  | 3.64561946  | -0.59908589  |   |             |             |             |
| 6 | -8.94454228  | -2.56864084 | 0.32866231   |   |             |             |             |
| 6 | -8.71122804  | -1.18855008 | 0.34782686   |   |             |             |             |
| 6 | -7.39615429  | 1.55151779  | -1.84548639  |   |             |             |             |
| 6 | -6.89657515  | 2.85717128  | -1.73832815  |   |             |             |             |
| 1 | -9.04262113  | -3.09626069 | 1.28546326   |   |             |             |             |
| 1 | -7.12282549  | 0.93643942  | -2.71255616  |   |             |             |             |
| 1 | -8.60012212  | -0.69012573 | 1.31858167   |   |             |             |             |
| 1 | -6.24620383  | 3.27127649  | -2.51756238  |   |             |             |             |
| 6 | -4.25654767  | -7.89229731 | 3.74573716   |   |             |             |             |
| 6 | -6.25807422  | -6.86219157 | 2.57526163   |   |             |             |             |

|   |             |             |             |
|---|-------------|-------------|-------------|
| 6 | -5.03748900 | -7.78182863 | 2.42742217  |
| 1 | -7.00060862 | -7.31589173 | 3.26670404  |
| 1 | -5.94734747 | -5.91787933 | 3.07181709  |
| 1 | -3.90236784 | -6.88825214 | 4.05692615  |
| 1 | -4.94105491 | -8.23469810 | 4.55279185  |
| 1 | -4.37866345 | -7.39834596 | 1.62618677  |
| 1 | -5.36240637 | -8.78986800 | 2.10336842  |
| 1 | -8.75182181 | -5.23410092 | 1.85903161  |
| 1 | -3.35603081 | -9.82904781 | 3.27715227  |
| 1 | -7.18058765 | 5.67521362  | 0.15820578  |
| 6 | -0.34786653 | -1.81192254 | 3.62662527  |
| 6 | 0.28159142  | -0.68103568 | 2.93548135  |
| 6 | -0.15834311 | -3.12595966 | 3.15159176  |
| 6 | 1.07665682  | -0.90464155 | 1.79532286  |
| 6 | 0.96701003  | -0.00876260 | 0.64032949  |
| 6 | -0.65072102 | 0.44723925  | 2.96859540  |
| 6 | -0.75343931 | 1.31419893  | 1.86191374  |
| 6 | 0.07336692  | 1.08189398  | 0.67204890  |
| 6 | -2.56434990 | -3.63987468 | 3.54763116  |
| 6 | -2.75781036 | -2.27642346 | 4.04523913  |
| 6 | -1.29069739 | -4.05654931 | 3.10988347  |
| 6 | -1.67118216 | -1.38040144 | 4.08296061  |
| 6 | -1.85739880 | 0.01330782  | 3.67522810  |
| 6 | -4.07369046 | -1.81246999 | 3.60397565  |
| 6 | -4.25502264 | -0.46767854 | 3.21566082  |
| 6 | -3.12489717 | 0.46549680  | 3.25409853  |
| 6 | -2.31914494 | -5.23376067 | 1.17054986  |
| 6 | -3.64121076 | -4.79748022 | 1.62804152  |
| 6 | -1.16654490 | -4.86458772 | 1.89485439  |
| 6 | -3.76339105 | -4.02121705 | 2.79698133  |
| 6 | -4.69716921 | -2.89103440 | 2.83131232  |
| 6 | -4.45028982 | -4.47717529 | 0.44804818  |
| 6 | -5.35242405 | -3.39538299 | 0.48102849  |
| 6 | -5.47533527 | -2.58397657 | 1.69597854  |
| 6 | 0.04789459  | -4.38101321 | -0.22203233 |
| 6 | -1.15317114 | -4.75912800 | -0.97586449 |
| 6 | 0.04079320  | -4.43040515 | 1.18479568  |
| 6 | -2.31187918 | -5.17672617 | -0.29415170 |
| 6 | -3.62873346 | -4.71331918 | -0.74039200 |
| 6 | -1.26207791 | -3.86610611 | -2.13068765 |
| 6 | -2.52825276 | -3.42435617 | -2.56519194 |
| 6 | -3.73439366 | -3.85441678 | -1.85404087 |
| 6 | 1.26938265  | -2.26985695 | 1.29706601  |
| 6 | 1.27787874  | -2.21785919 | -0.16692986 |
| 6 | 0.66738755  | -3.35908578 | 1.96153605  |
| 6 | 0.67913742  | -3.25456198 | -0.91296162 |
| 6 | -0.13048346 | -2.93564616 | -2.09234507 |
| 6 | 1.09086811  | -0.82158245 | -0.57281338 |
| 6 | 0.31243622  | -0.51565027 | -1.70755848 |
| 6 | -0.30995527 | -1.59278391 | -2.48150273 |
| 6 | -4.03628582 | -1.59413190 | -2.50746990 |
| 6 | -2.71368765 | -2.02704961 | -2.96941035 |
| 6 | -1.62573377 | -1.13004541 | -2.92602106 |
| 6 | -4.21866629 | -0.28232453 | -2.02544129 |
| 6 | -5.63853571 | -1.13716254 | -0.17280649 |
| 6 | -5.45762642 | -2.49918428 | -0.67357576 |

|   |             |             |             |
|---|-------------|-------------|-------------|
| 6 | -4.66902845 | -2.72497503 | -1.82167422 |
| 6 | -5.03633177 | -0.05061284 | -0.83421450 |
| 6 | -4.43186735 | 0.98697888  | 1.34663271  |
| 6 | -5.06344957 | -0.14936544 | 2.03725112  |
| 6 | -5.65393203 | -1.18861936 | 1.29086986  |
| 6 | -4.41810094 | 1.03127944  | -0.06186565 |
| 6 | -2.06044226 | 1.82635206  | -0.04642754 |
| 6 | -2.07004080 | 1.77828512  | 1.41786553  |
| 6 | -3.23394866 | 1.36662737  | 2.10267418  |
| 6 | -3.21371420 | 1.46516330  | -0.77314400 |
| 6 | -1.81720940 | 0.23629398  | -2.43034191 |
| 6 | -0.61665001 | 0.61732003  | -1.67582153 |
| 6 | -0.73632356 | 1.39809815  | -0.50771353 |
| 6 | -3.08997474 | 0.65220823  | -1.98792804 |

### MC-PDI3C60

QM1//QM2: BLYP-D3(BJ)/def2-SVP//GFN2-xTB  
Only solute complex shown

| Atom | X          | Y           | Z           |
|------|------------|-------------|-------------|
| 6    | 7.07484878 | 1.20964896  | 0.01609489  |
| 6    | 6.31165387 | 2.33105713  | -0.39790656 |
| 6    | 7.20559662 | 0.10811182  | -0.87897178 |
| 6    | 5.68493548 | 2.41283120  | -1.64878345 |
| 1    | 6.24329366 | 3.17446116  | 0.29495648  |
| 6    | 7.79990312 | -1.17775050 | -0.44316854 |
| 6    | 6.65541700 | 0.19197230  | -2.20504267 |
| 6    | 5.83171213 | 1.31602141  | -2.56165684 |
| 8    | 8.01983295 | -1.47525010 | 0.74077892  |
| 7    | 8.09022938 | -2.11753288 | -1.44871984 |
| 6    | 6.93174079 | -0.81783135 | -3.18758693 |
| 6    | 5.16457274 | 1.32510456  | -3.83009474 |
| 6    | 7.65393565 | -2.04387316 | -2.78611343 |
| 6    | 6.43907674 | -0.67175137 | -4.51688628 |
| 6    | 5.48560200 | 0.34153276  | -4.77160925 |
| 8    | 7.83511829 | -3.02350854 | -3.52215564 |
| 1    | 5.05398339 | 0.40285975  | -5.77652540 |
| 6    | 4.94027728 | 3.60808543  | -2.07860224 |
| 6    | 4.23021687 | 2.41164373  | -4.14403977 |
| 6    | 4.86580238 | 4.76499467  | -1.28991109 |
| 6    | 4.23388425 | 3.58880201  | -3.32223702 |
| 6    | 3.29880978 | 2.31255657  | -5.18076758 |
| 6    | 4.17007768 | 5.92654068  | -1.69169105 |
| 1    | 5.37332564 | 4.79899830  | -0.32197926 |
| 6    | 3.47661570 | 4.73536856  | -3.74213822 |
| 1    | 3.16583147 | 1.34546449  | -5.67944310 |
| 6    | 2.43945515 | 3.38208065  | -5.54838801 |
| 6    | 3.49521484 | 5.92869237  | -2.94027570 |
| 6    | 2.65530960 | 4.64686140  | -4.91570516 |
| 6    | 2.74149969 | 7.11944140  | -3.39366880 |
| 6    | 2.09345237 | 5.88615944  | -5.47967462 |
| 8    | 2.66322347 | 8.17932049  | -2.75418200 |
| 7    | 2.10289429 | 7.02581240  | -4.64306948 |
| 8    | 1.62941009 | 5.97562936  | -6.62456270 |
| 6    | 7.73708296 | 1.30664444  | 1.34407131  |
| 6    | 7.02890157 | 1.80863792  | 2.46395531  |

### MC-PDI4C60

QM1//QM2: BLYP-D3(BJ)/def2-SVP//GFN2-xTB  
Only solute complex shown

| Atom | X           | Y           | Z           |
|------|-------------|-------------|-------------|
| 6    | -5.20533314 | -1.39543880 | -3.52216881 |
| 6    | -3.94496158 | -1.85973121 | -3.97283522 |
| 6    | -5.85498736 | -2.04049287 | -2.44744815 |
| 6    | -3.29274234 | -2.93991775 | -3.36072754 |
| 1    | -3.48172989 | -1.33389385 | -4.81323731 |
| 6    | -7.15838745 | -1.53371338 | -1.95377748 |
| 6    | -5.22281549 | -3.15210820 | -1.81786881 |
| 6    | -3.92437882 | -3.59207960 | -2.24891003 |
| 8    | -7.66831947 | -0.49456010 | -2.38268216 |
| 7    | -7.80278801 | -2.28556316 | -0.96168353 |
| 6    | -5.89401063 | -3.82232138 | -0.75329830 |
| 6    | -3.27154710 | -4.65657383 | -1.54083910 |
| 6    | -7.27198196 | -3.43364359 | -0.36163908 |
| 6    | -5.24036725 | -4.87990657 | -0.08470691 |
| 6    | -3.93531844 | -5.26888092 | -0.46920364 |
| 8    | -7.92582282 | -4.06746737 | 0.47227095  |
| 1    | -3.46062385 | -6.07913752 | 0.09093094  |
| 6    | -1.98473618 | -3.42062982 | -3.82610594 |
| 6    | -1.92220639 | -5.06354554 | -1.94239933 |
| 6    | -1.32697322 | -2.84366321 | -4.92266986 |
| 6    | -1.33802946 | -4.48967865 | -3.12038016 |
| 6    | -1.15357596 | -5.94620334 | -1.16967534 |
| 6    | -0.09534895 | -3.34788028 | -5.40532106 |
| 1    | -1.75818119 | -1.98413785 | -5.44385053 |
| 6    | -0.06006919 | -4.96581342 | -3.57632589 |
| 1    | -1.52200179 | -6.30807819 | -0.20522097 |
| 6    | 0.13126305  | -6.36920577 | -1.58657391 |
| 6    | 0.52815250  | -4.43795752 | -4.76136509 |
| 6    | 0.65074633  | -5.94954375 | -2.83180181 |
| 6    | 1.74689867  | -5.05309100 | -5.33963042 |
| 6    | 1.89452993  | -6.55447748 | -3.36621226 |
| 8    | 2.22297548  | -4.68284982 | -6.41958197 |
| 7    | 2.32280624  | -6.11784044 | -4.63483227 |
| 8    | 2.50639081  | -7.44507947 | -2.76952284 |
| 6    | 0.46164050  | -2.67992368 | -6.54878537 |
| 7    | 0.77466673  | -2.00755727 | -7.45876544 |

|   |             |             |             |   |             |             |             |
|---|-------------|-------------|-------------|---|-------------|-------------|-------------|
| 6 | 9.09371025  | 0.94607812  | 1.54921593  | 6 | 0.88955104  | -7.17485776 | -0.67355462 |
| 6 | 7.61252669  | 1.88762433  | 3.73594387  | 7 | 1.44618473  | -7.75749735 | 0.17960881  |
| 6 | 9.70287729  | 1.04274446  | 2.80287477  | 6 | -5.82946461 | -5.59722860 | 1.01184075  |
| 6 | 8.97404460  | 1.50902137  | 3.94514051  | 7 | -6.17665684 | -6.24835101 | 1.92542393  |
| 1 | 5.97491627  | 2.09491338  | 2.34658575  | 6 | -5.76017124 | -0.26177623 | -4.20946630 |
| 1 | 9.68530207  | 0.56998928  | 0.70400100  | 7 | -6.07273796 | 0.66092395  | -4.86550512 |
| 1 | 7.00112043  | 2.24564966  | 4.56975635  | 6 | 2.28730073  | 5.11401762  | 5.82425752  |
| 1 | 10.75226808 | 0.74026001  | 2.89694304  | 6 | 3.44906798  | 4.57149175  | 5.22324582  |
| 6 | 4.16884724  | 7.04564062  | -0.69351794 | 6 | 1.37855669  | 5.87913079  | 5.05786629  |
| 6 | 5.06705478  | 8.13085337  | -0.76982667 | 6 | 3.76104741  | 4.80835954  | 3.87548949  |
| 6 | 3.36541724  | 6.94339828  | 0.46217348  | 1 | 4.09674240  | 3.94270815  | 5.84193863  |
| 6 | 5.14466485  | 9.09551686  | 0.24599187  | 6 | 0.12011217  | 6.36456279  | 5.67026136  |
| 6 | 3.42352868  | 7.90383770  | 1.48392813  | 6 | 1.67036372  | 6.13544030  | 3.68581178  |
| 6 | 4.30192286  | 9.02281633  | 1.39562928  | 6 | 2.88261703  | 5.63344451  | 3.09391770  |
| 1 | 5.75006538  | 8.20266021  | -1.62819784 | 8 | -0.13141769 | 6.22799797  | 6.87197430  |
| 1 | 2.69003532  | 6.08576186  | 0.57236283  | 7 | -0.81034511 | 6.96151777  | 4.80394804  |
| 1 | 5.89048455  | 9.89180593  | 0.14664104  | 6 | 0.73228673  | 6.86019376  | 2.89581014  |
| 1 | 2.77499718  | 7.77648268  | 2.35830787  | 6 | 3.15609388  | 5.90559027  | 1.71140345  |
| 6 | 1.30674589  | 3.07836787  | -6.44980544 | 6 | -0.53702961 | 7.34080587  | 3.47973462  |
| 6 | 1.37888394  | 2.06042804  | -7.43755782 | 6 | 1.01171980  | 7.09706649  | 1.53025316  |
| 6 | 0.03571547  | 3.68913090  | -6.27078046 | 6 | 2.21766884  | 6.63048293  | 0.96028781  |
| 6 | 0.27339606  | 1.69007797  | -8.21453844 | 8 | -1.35125242 | 8.02038355  | 2.84958422  |
| 6 | -1.07928089 | 3.34287504  | -7.02909011 | 1 | 2.38405311  | 6.81906796  | -0.10432422 |
| 6 | -0.99676264 | 2.33018266  | -8.04148482 | 6 | 4.90780687  | 4.16567341  | 3.22264229  |
| 1 | 2.33093000  | 1.54619875  | -7.62506528 | 6 | 4.36976560  | 5.36054157  | 1.09416153  |
| 1 | -0.09876010 | 4.41591317  | -5.46415531 | 6 | 5.66837325  | 3.18132591  | 3.87383427  |
| 1 | 0.40406164  | 0.89844917  | -8.96266334 | 6 | 5.20411743  | 4.47273667  | 1.85222052  |
| 1 | -2.03994120 | 3.81104437  | -6.78941143 | 6 | 4.70573183  | 5.63731888  | -0.24046743 |
| 6 | 6.95294157  | -1.42608396 | -5.68635532 | 6 | 6.74122580  | 2.52074325  | 3.22955388  |
| 6 | 6.09353655  | -1.94489382 | -6.68609108 | 1 | 5.42218738  | 2.87534095  | 4.89393217  |
| 6 | 8.34871400  | -1.53062793 | -5.91351922 | 6 | 6.33053615  | 3.84453251  | 1.21346881  |
| 6 | 6.59807419  | -2.60383687 | -7.81966563 | 1 | 4.09594925  | 6.31999420  | -0.83927116 |
| 6 | 8.86624855  | -2.14540017 | -7.05365244 | 6 | 5.83677968  | 5.05318528  | -0.85583440 |
| 6 | 8.00364738  | -2.72587446 | -8.03613735 | 6 | 7.11229567  | 2.87784327  | 1.91197965  |
| 1 | 5.00247459  | -1.87592586 | -6.55440418 | 6 | 6.65400260  | 4.15301310  | -0.13761879 |
| 1 | 9.03783943  | -1.10525586 | -5.17264005 | 6 | 8.30858843  | 2.27085932  | 1.28349656  |
| 1 | 5.88758201  | -3.02102509 | -8.54025349 | 6 | 7.83270333  | 3.55083227  | -0.79527038 |
| 1 | 9.95282249  | -2.17147172 | -7.19082449 | 8 | 9.02820140  | 1.46033468  | 1.88303051  |
| 7 | -2.09060733 | 1.98321167  | -8.80178162 | 7 | 8.61054847  | 2.67009969  | -0.02535731 |
| 7 | 8.51333250  | -3.37062859 | -9.16503572 | 8 | 8.14631851  | 3.81395366  | -1.96021035 |
| 7 | 9.57510168  | 1.61932342  | 5.19515076  | 6 | 7.37817564  | 1.46634251  | 3.96968853  |
| 7 | 4.32412611  | 10.00651721 | 2.40171617  | 7 | 7.75291349  | 0.60695297  | 4.67699110  |
| 6 | 10.84395009 | 0.92840940  | 5.43974301  | 6 | 6.08104586  | 5.41926490  | -2.21987010 |
| 1 | 10.76948688 | -0.17039332 | 5.28004010  | 7 | 6.11744378  | 5.83594371  | -3.31770729 |
| 1 | 11.64825149 | 1.30421907  | 4.77567341  | 6 | 0.10044347  | 7.77483333  | 0.65017017  |
| 1 | 11.15734308 | 1.10706273  | 6.48254854  | 7 | -0.53532503 | 8.28987350  | -0.19180790 |
| 6 | 8.73344454  | 1.91280349  | 6.35603932  | 6 | 2.07930431  | 4.82140398  | 7.21515444  |
| 1 | 7.99368840  | 1.10702997  | 6.56244837  | 7 | 2.04305912  | 4.51788117  | 8.34874559  |
| 1 | 9.37513750  | 2.03303132  | 7.24671834  | 6 | 3.33242101  | -6.95445045 | -5.33934308 |
| 1 | 8.16534456  | 2.85143548  | 6.20606936  | 1 | 3.91860040  | -7.47677536 | -4.56890255 |
| 6 | 3.85088897  | 9.62633774  | 3.73961311  | 6 | 9.82311384  | 2.10375788  | -0.67525923 |
| 1 | 4.44827831  | 8.79911176  | 4.19160019  | 1 | 10.52025056 | 1.85574616  | 0.14105947  |
| 1 | 3.92615956  | 10.49881536 | 4.41216908  | 7 | 6.20399416  | -8.72782622 | -5.50583176 |
| 1 | 2.79082622  | 9.30617866  | 3.72328573  | 7 | 7.29415449  | -8.07387043 | -5.13722940 |
| 6 | 5.40705873  | 10.99292912 | 2.36901120  | 1 | 7.77544007  | -5.96862949 | -3.64822612 |
| 1 | 6.41870117  | 10.53400986 | 2.45687326  | 1 | 7.80580448  | -3.82258342 | -2.35895685 |



|   |             |              |              |   |              |             |             |
|---|-------------|--------------|--------------|---|--------------|-------------|-------------|
| 1 | 5.38728943  | 11.56995545  | 1.42294315   | 6 | 5.83895350   | -8.34586605 | -6.77502833 |
| 1 | 5.27731872  | 11.70084126  | 3.20823761   | 6 | 8.21638902   | -5.06294400 | -4.08636762 |
| 6 | -3.34802708 | 2.71202527   | -8.64637606  | 6 | 8.25639644   | -3.86532194 | -3.35936583 |
| 1 | -4.05210128 | 2.39965874   | -9.43621080  | 1 | 9.10640985   | -2.51507078 | -1.17240503 |
| 1 | -3.83343639 | 2.52873687   | -7.66226266  | 7 | 7.64536988   | -7.26168081 | -6.16778705 |
| 1 | -3.18374130 | 3.80393558   | -8.74854462  | 1 | 9.47121354   | -0.45999897 | 0.18276483  |
| 6 | -2.08011985 | 0.74225852   | -9.57712652  | 1 | 9.63618877   | -7.09795285 | -5.61642854 |
| 1 | -3.09386389 | 0.55176227   | -9.96455781  | 6 | 9.15189980   | -1.53886616 | -1.67157377 |
| 1 | -1.37689482 | 0.77654421   | -10.43618687 | 6 | 9.38663461   | -0.38846483 | -0.90609738 |
| 1 | -1.79049337 | -0.13012720  | -8.95472000  | 6 | 8.87734621   | -6.46279063 | -6.11572630 |
| 6 | 7.63073749  | -4.28635527  | -9.89561591  | 6 | 6.76150836   | -7.39008551 | -7.20441728 |
| 1 | 8.17510947  | -4.70243889  | -10.76057588 | 6 | 8.76227844   | -5.13654276 | -5.38483089 |
| 1 | 7.29796318  | -5.13465923  | -9.25548625  | 6 | 8.86593448   | -2.70322069 | -3.89767574 |
| 1 | 6.73473117  | -3.76709796  | -10.28308497 | 6 | 9.02840729   | -1.46796366 | -3.08315595 |
| 6 | 9.93929374  | -3.71650279  | -9.19698599  | 6 | 9.52316454   | 0.87572982  | -1.51762048 |
| 1 | 10.56801805 | -2.82832844  | -9.00659700  | 1 | 9.21316510   | -6.30118724 | -7.15531556 |
| 1 | 10.21290103 | -4.49526626  | -8.45064531  | 1 | 6.85922157   | -6.82266202 | -6.13257856 |
| 1 | 10.19610849 | -4.09988555  | -10.19971857 | 6 | 9.31020222   | -3.97145470 | -5.95482239 |
| 6 | -7.10568357 | -6.32396052  | -0.56856682  | 6 | 9.12505052   | -0.18728593 | -3.68407861 |
| 6 | -7.15232022 | -5.05629812  | 0.06653967   | 6 | 9.37274657   | -2.77481028 | -5.21972630 |
| 6 | -6.09355647 | -7.24745121  | -0.17576747  | 6 | 9.37302910   | 0.96333736  | -2.91731905 |
| 6 | -6.27870719 | -4.69227280  | 1.10630121   | 1 | 9.72425694   | -4.00599757 | -6.97241299 |
| 1 | -7.93180971 | -4.35840866  | -0.26480695  | 1 | 9.02617423   | -0.08651303 | -4.77172567 |
| 6 | -5.76920941 | -8.41669414  | -1.02506182  | 1 | 9.43658609   | 1.94012834  | -3.41339398 |
| 6 | -5.27911200 | -6.97549985  | 0.97572423   | 1 | 9.85877369   | -1.89948399 | -5.67294046 |
| 6 | -5.35757512 | -5.67784720  | 1.60279702   | 6 | 3.42383374   | -9.21704577 | -6.65248481 |
| 8 | -6.16302293 | -8.55243125  | -2.19266346  | 6 | 4.68360409   | -8.97185283 | -7.51015962 |
| 7 | -4.91716301 | -9.38950627  | -0.46366423  | 6 | 2.60850567   | -7.97693383 | -6.24771556 |
| 6 | -4.39487346 | -7.98435397  | 1.50146150   | 1 | 2.75192696   | -9.88179933 | -7.23069672 |
| 6 | -4.50502078 | -5.38778652  | 2.71869657   | 1 | 3.70597045   | -9.77553057 | -5.73822665 |
| 6 | -4.19085232 | -9.23686771  | 0.73105835   | 1 | 1.71319732   | -8.33518383 | -5.70041007 |
| 6 | -3.67710981 | -7.72793729  | 2.71191489   | 1 | 2.22725380   | -7.45226437 | -7.14677191 |
| 6 | -3.72001522 | -6.41700954  | 3.24824262   | 1 | 5.01851287   | -9.95375214 | -7.91041852 |
| 8 | -3.37790263 | -10.12022438 | 1.04759529   | 1 | 4.44028508   | -8.35025760 | -8.39459909 |
| 1 | -3.15478609 | -6.22665697  | 4.16549881   | 1 | 3.99109725   | -6.28322828 | -5.91537483 |
| 6 | -6.32784681 | -3.36539212  | 1.75107269   | 1 | 10.24288171  | 2.91435909  | -1.29209566 |
| 6 | -4.53053834 | -4.05547564  | 3.33761771   | 6 | -9.13225367  | -1.81972578 | -0.50579110 |
| 6 | -7.12461400 | -2.32489785  | 1.25641744   | 1 | -9.10937552  | -0.72050157 | -0.55335889 |
| 6 | -5.49836111 | -3.09960092  | 2.89157926   | 6 | -2.14387020  | 7.31021215  | 5.33036304  |
| 6 | -3.61544752 | -3.67853357  | 4.33268877   | 1 | -2.38931857  | 8.33401516  | 5.00306688  |
| 6 | -7.25525290 | -1.06226302  | 1.89561979   | 7 | -10.95587513 | 1.38150884  | 0.29988558  |
| 1 | -7.64318783 | -2.46914492  | 0.30467089   | 7 | -10.34955995 | 1.77474526  | 1.41110399  |
| 6 | -5.64490249 | -1.85890141  | 3.60232390   | 1 | -7.27281849  | 0.49620033  | 2.76743169  |
| 1 | -2.77103044 | -4.33414091  | 4.56844338   | 6 | -11.40398151 | 0.09221207  | 0.44587297  |
| 6 | -3.70224046 | -2.45105702  | 5.02983520   | 1 | -5.35739589  | 2.05646337  | 2.99440214  |
| 6 | -6.61028689 | -0.89133086  | 3.16078843   | 6 | -7.42079440  | 1.46864023  | 3.25932370  |
| 6 | -4.81186870 | -1.59584718  | 4.74152546   | 7 | -10.38755544 | 0.73789939  | 2.27875252  |
| 6 | -7.00299662 | 0.19880417   | 4.07878256   | 6 | -6.33828063  | 2.35326789  | 3.39184192  |
| 6 | -5.20377120 | -0.51893763  | 5.66914448   | 1 | -10.69561106 | 1.17847476  | 4.31401554  |
| 8 | -7.98232126 | 0.93885101   | 3.90123537   | 1 | -6.55389084  | 6.34884285  | 4.03686347  |
| 7 | -6.23711480 | 0.34414617   | 5.25545602   | 6 | -9.86673184  | 0.85511545  | 3.65431216  |
| 8 | -4.73094192 | -0.37339506  | 6.80983192   | 6 | -11.04138185 | -0.32707474 | 1.73110117  |
| 6 | -8.18561568 | -6.66892383  | -1.52464673  | 1 | -4.68829713  | 7.90743605  | 4.58340018  |
| 6 | -8.65309318 | -5.75386236  | -2.49984046  | 6 | -5.56091032  | 5.94253946  | 4.26812606  |
| 6 | -8.86528035 | -7.91078947  | -1.42449576  | 6 | -8.69646216  | 1.81039547  | 3.76163713  |
| 6 | -9.71851936 | -6.06502342  | -3.35310414  | 6 | -4.50956685  | 6.82429575  | 4.56681821  |

|   |              |              |             |   |              |             |             |
|---|--------------|--------------|-------------|---|--------------|-------------|-------------|
| 6 | -9.94468938  | -8.22894046  | -2.25068879 | 6 | -6.49307713  | 3.60518433  | 4.04331983  |
| 6 | -10.39732667 | -7.31870173  | -3.25817825 | 6 | -5.35429280  | 4.53946514  | 4.25559555  |
| 1 | -8.15364384  | -4.77954021  | -2.60296427 | 1 | -9.57555398  | -0.16632190 | 3.96207665  |
| 1 | -8.55770691  | -8.63658619  | -0.65899972 | 6 | -3.22131942  | 6.34070823  | 4.87250414  |
| 1 | -10.03974033 | -5.32479928  | -4.09217252 | 6 | -8.86020365  | 3.05756057  | 4.39771681  |
| 1 | -10.44277994 | -9.19475133  | -2.11444065 | 6 | -7.77692667  | 3.93871337  | 4.54285924  |
| 6 | -7.91160841  | 0.01860875   | 1.12220943  | 6 | -4.04229023  | 4.06283805  | 4.50851796  |
| 6 | -8.89654856  | -0.26647578  | 0.13691743  | 6 | -2.99552419  | 4.94868678  | 4.81234121  |
| 6 | -7.43017184  | 1.35432340   | 1.15043710  | 1 | -9.84146986  | 3.31520584  | 4.81801735  |
| 6 | -9.28879420  | 0.66894435   | -0.82503571 | 1 | -3.84934229  | 2.98299102  | 4.52176614  |
| 6 | -7.79592935  | 2.30052405   | 0.19548373  | 1 | -7.91797785  | 4.88259518  | 5.08311101  |
| 6 | -8.70393839  | 1.97446303   | -0.86219619 | 1 | -1.99718974  | 4.54184334  | 5.02187672  |
| 1 | -9.37600580  | -1.25332594  | 0.13067043  | 6 | -10.27492566 | -2.39335790 | -1.36586855 |
| 1 | -6.70784179  | 1.65497317   | 1.91092647  | 6 | -12.10554759 | -0.66195855 | -0.65447030 |
| 1 | -10.04627490 | 0.38167597   | -1.56131699 | 6 | -11.68402715 | -2.14446651 | -0.79269791 |
| 1 | -7.33558989  | 3.29250990   | 0.24492507  | 1 | -11.93302489 | -0.12818143 | -1.61229832 |
| 6 | -2.60806414  | -2.10088437  | 5.96697092  | 1 | -13.20081373 | -0.64207869 | -0.47125891 |
| 6 | -1.98423901  | -3.07519001  | 6.78911434  | 1 | -10.12206741 | -3.48665683 | -1.46673118 |
| 6 | -2.09484505  | -0.77849301  | 6.04489748  | 1 | -10.20491564 | -1.97327777 | -2.38980419 |
| 6 | -0.96362322  | -2.74312271  | 7.68934245  | 1 | -12.41478162 | -2.64863250 | -1.45694215 |
| 6 | -1.05378393  | -0.43202135  | 6.90237135  | 1 | -11.78068709 | -2.64914615 | 0.19288153  |
| 6 | -0.46812937  | -1.40334629  | 7.77718219  | 1 | -11.16441776 | -1.26844997 | 2.26962589  |
| 1 | -2.33513909  | -4.11741971  | 6.76238116  | 1 | -9.23539655  | -2.13628081 | 0.54474752  |
| 1 | -2.52029002  | 0.00547678   | 5.41069377  | 1 | -2.05293528  | 7.29145012  | 6.43010099  |
| 1 | -0.56954962  | -3.52398768  | 8.34984527  | 6 | 1.70305747   | 2.41245000  | -0.37045081 |
| 1 | -0.69156734  | 0.60228270   | 6.89144915  | 6 | 2.91339642   | 1.60847091  | -0.18394414 |
| 6 | -2.92367355  | -8.72702657  | 3.51903217  | 6 | 1.13843937   | 3.10557097  | 0.71914106  |
| 6 | -1.70117052  | -8.37716844  | 4.15887514  | 6 | 3.51530410   | 1.52458555  | 1.08858065  |
| 6 | -3.44187159  | -10.02011203 | 3.79824715  | 6 | 4.02714581   | 0.24476978  | 1.58539540  |
| 6 | -1.01291573  | -9.26232509  | 4.99243896  | 6 | 2.79056803   | 0.40569981  | -1.01038655 |
| 6 | -2.77669885  | -10.91310103 | 4.64041365  | 6 | 3.27762515   | -0.82988319 | -0.53147072 |
| 6 | -1.53675004  | -10.56252095 | 5.27099040  | 6 | 3.90436764   | -0.91092311 | 0.79080866  |
| 1 | -1.26136616  | -7.38533665  | 3.98415530  | 6 | -1.15141086  | 2.44945878  | 0.00181321  |
| 1 | -4.40069013  | -10.32373754 | 3.36163002  | 6 | -0.56844950  | 1.72574984  | -1.13078774 |
| 1 | -0.06649700  | -8.94223286  | 5.43729973  | 6 | -0.31465238  | 3.12792294  | 0.90950316  |
| 1 | -3.23073902  | -11.89238521 | 4.82474813  | 6 | 0.83110617   | 1.70934112  | -1.31762885 |
| 7 | 0.53255970   | -1.05902675  | 8.66306225  | 6 | 1.50599353   | 0.46602085  | -1.71084681 |
| 7 | -0.90220649  | -11.44056414 | 6.12565141  | 6 | -1.34882190  | 0.50477036  | -1.33787652 |
| 7 | -11.44875058 | -7.64784617  | -4.10049803 | 6 | -0.69801298  | -0.68718386 | -1.71476412 |
| 7 | -8.98492427  | 2.87706318   | -1.86726039 | 6 | 0.75481508   | -0.70861561 | -1.90551663 |
| 6 | -12.00708279 | -6.62274668  | -4.97999483 | 6 | -1.68233266  | 2.31167236  | 2.82576675  |
| 1 | -12.81705140 | -7.06269899  | -5.58741557 | 6 | -2.55769409  | 1.60894420  | 1.88197486  |
| 1 | -12.42450153 | -5.76184513  | -4.41227247 | 6 | -0.58641412  | 3.05927835  | 2.34966332  |
| 1 | -11.23449017 | -6.22570490  | -5.67000491 | 6 | -2.29240831  | 1.67443311  | 0.49751881  |
| 6 | -12.27239050 | -8.81778014  | -3.79738713 | 6 | -2.41294754  | 0.47135562  | -0.32958646 |
| 1 | -11.66161482 | -9.74276981  | -3.77197098 | 6 | -2.95256636  | 0.33534362  | 2.49627933  |
| 1 | -12.79680104 | -8.73558215  | -2.81748505 | 6 | -3.06372265  | -0.82316649 | 1.70004319  |
| 1 | -13.04331767 | -8.93802680  | -4.57865615 | 6 | -2.78947617  | -0.75166821 | 0.26175860  |
| 6 | -8.21256880  | 4.11153080   | -1.95314095 | 6 | 0.84016545   | 2.19216681  | 4.20155169  |
| 1 | -7.12488925  | 3.91610349   | -2.09881885 | 6 | -0.30005016  | 1.41645503  | 4.69441807  |
| 1 | -8.57394220  | 4.71309061   | -2.80467500 | 6 | 0.69782518   | 2.99090810  | 3.04948172  |
| 1 | -8.33579206  | 4.72289218   | -1.03660927 | 6 | -1.53888289  | 1.47669690  | 4.02153627  |
| 6 | -9.72597307  | 2.45525531   | -3.05192324 | 6 | -2.32119232  | 0.25498548  | 3.81749263  |
| 1 | -9.12885153  | 1.77631933   | -3.70306004 | 6 | 0.20596307   | 0.13333991  | 5.18639890  |
| 1 | -10.65228028 | 1.92205489   | -2.76979866 | 6 | -0.54466632  | -1.04116623 | 4.98588488  |
| 1 | -10.00836051 | 3.34696108   | -3.63935149 | 6 | -1.83296708  | -0.98117785 | 4.29230423  |

|   |             |              |             |   |             |             |             |
|---|-------------|--------------|-------------|---|-------------|-------------|-------------|
| 6 | 0.98411280  | -2.02593946  | 9.66263945  | 6 | 2.91674090  | 2.23294608  | 2.21826744  |
| 1 | 1.72746693  | -1.55484634  | 10.32732987 | 6 | 3.07147488  | 1.40897243  | 3.41786186  |
| 1 | 0.14852175  | -2.39674221  | 10.29546035 | 6 | 1.75913945  | 3.00935550  | 2.03857333  |
| 1 | 1.46240326  | -2.91827933  | 9.20625796  | 6 | 2.05241816  | 1.38562482  | 4.39029561  |
| 6 | 1.00021832  | 0.32299563   | 8.73925546  | 6 | 1.65912471  | 0.11457719  | 4.99997657  |
| 1 | 1.83340709  | 0.38206503   | 9.45914679  | 6 | 3.75398764  | 0.17413363  | 3.02590562  |
| 1 | 1.36481031  | 0.68801736   | 7.75698445  | 6 | 3.37327913  | -1.04892550 | 3.61539758  |
| 1 | 0.20701866  | 1.03137822   | 9.06983276  | 6 | 2.30569838  | -1.07865267 | 4.62015642  |
| 6 | -1.32175076 | -12.83958905 | 6.15903460  | 6 | -0.74336816 | -2.98873275 | 3.65340933  |
| 1 | -2.38802632 | -12.94447737 | 6.44493406  | 6 | 0.12822647  | -2.28120488 | 4.59200418  |
| 1 | -1.18805204 | -13.32903371 | 5.17013716  | 6 | 1.52474556  | -2.29928707 | 4.41236352  |
| 1 | -0.72090542 | -13.38416237 | 6.90642796  | 6 | -0.18265405 | -3.68698247 | 2.56380355  |
| 6 | 0.40324372  | -11.10060108 | 6.67879271  | 6 | -1.97342033 | -2.83018209 | 1.06250412  |
| 1 | 0.67461178  | -11.84568826 | 7.44607745  | 6 | -2.56000742 | -2.10765349 | 2.19419485  |
| 1 | 1.20283486  | -11.08822586 | 5.90416863  | 6 | -1.95543405 | -2.18476005 | 3.46571289  |
| 1 | 0.38371123  | -10.10050907 | 7.15246055  | 6 | -0.80897198 | -3.60392472 | 1.24352738  |
| 6 | -4.73944557 | -10.65838153 | -1.21277883 | 6 | 0.12300177  | -2.75825500 | -0.90565809 |
| 1 | -5.56977326 | -10.69438684 | -1.93460407 | 6 | -1.08537651 | -1.95369037 | -1.09149543 |
| 6 | 8.82079148  | -3.35020005  | -1.06211307 | 6 | -2.11122418 | -1.98827340 | -0.12851733 |
| 1 | 9.32131515  | -3.11747971  | -0.10908029 | 6 | 0.25944529  | -3.56626125 | 0.23978340  |
| 7 | -0.42729830 | -9.19697442  | -1.58569145 | 6 | 2.63937807  | -2.88675303 | 0.45991062  |
| 7 | 0.62620287  | -9.60327782  | -0.89028748 | 6 | 2.49697704  | -2.05175237 | -0.73452909 |
| 1 | 3.12198272  | -9.82869229  | 1.15577885  | 6 | 1.26065918  | -1.99045411 | -1.40837849 |
| 1 | 4.72471277  | -7.88930935  | 1.26929444  | 6 | 1.54378965  | -3.63490206 | 0.93606435  |
| 6 | -0.58550182 | -10.00658760 | -2.68607571 | 6 | 2.10866802  | -3.02386621 | 3.28292995  |
| 6 | 3.68209223  | -9.51675233  | 0.26530694  | 6 | 3.25010732  | -2.25196768 | 2.78752620  |
| 6 | 4.57279184  | -8.42937839  | 0.32330758  | 6 | 3.50980147  | -2.18387494 | 1.40361714  |
| 1 | 5.16900418  | -5.73375308  | 0.74419475  | 6 | 1.27167045  | -3.70604767 | 2.37517164  |
| 7 | 1.15321875  | -10.67137143 | -1.53376217 |   |             |             |             |
| 1 | 6.67447447  | -3.77390146  | 0.65744166  |   |             |             |             |
| 1 | 2.20166445  | -11.75293504 | -0.05115662 |   |             |             |             |
| 6 | 6.01557684  | -5.74516807  | 0.04207899  |   |             |             |             |
| 6 | 6.86151762  | -4.62472715  | -0.01135311 |   |             |             |             |
| 6 | 2.39911699  | -11.28293674 | -1.03420811 |   |             |             |             |
| 6 | 0.43410939  | -10.96280679 | -2.65661599 |   |             |             |             |
| 6 | 3.47781368  | -10.22202739 | -0.93799962 |   |             |             |             |
| 6 | 5.29905194  | -8.02514244  | -0.82684301 |   |             |             |             |
| 6 | 6.22848387  | -6.86392481  | -0.80405526 |   |             |             |             |
| 6 | 7.93578060  | -4.57800617  | -0.92792271 |   |             |             |             |
| 1 | 2.66395361  | -12.08676968 | -1.74338693 |   |             |             |             |
| 1 | 0.68584087  | -11.80182670 | -3.30992282 |   |             |             |             |
| 6 | 4.19509964  | -9.82582889  | -2.08622789 |   |             |             |             |
| 6 | 7.34694489  | -6.83258830  | -1.67034691 |   |             |             |             |
| 6 | 5.09459749  | -8.75277161  | -2.02834014 |   |             |             |             |
| 6 | 8.17250504  | -5.70437334  | -1.74029821 |   |             |             |             |
| 1 | 4.02440886  | -10.34319490 | -3.04301671 |   |             |             |             |
| 1 | 7.57563187  | -7.70480206  | -2.29688829 |   |             |             |             |
| 1 | 9.01035005  | -5.69801270  | -2.45073291 |   |             |             |             |
| 1 | 5.62212960  | -8.44972727  | -2.94099967 |   |             |             |             |
| 6 | -3.08781293 | -9.67294139  | -2.94155199 |   |             |             |             |
| 6 | -1.72803502 | -9.85580025  | -3.65448675 |   |             |             |             |
| 6 | -3.40100379 | -10.80645988 | -1.95358275 |   |             |             |             |
| 1 | -3.06945474 | -8.70988190  | -2.39465801 |   |             |             |             |
| 1 | -3.88981710 | -9.60952787  | -3.70344619 |   |             |             |             |
| 1 | -2.58500724 | -10.89078078 | -1.21269005 |   |             |             |             |
| 1 | -3.45224881 | -11.76855901 | -2.50680184 |   |             |             |             |

|   |             |              |             |
|---|-------------|--------------|-------------|
| 1 | -1.75642722 | -10.75001171 | -4.30974666 |
| 1 | -1.54211879 | -8.98333888  | -4.31792057 |
| 1 | -4.85938260 | -11.48061039 | -0.48500551 |
| 1 | 9.58743373  | -3.52381428  | -1.83706455 |
| 6 | -6.59495321 | 1.43256343   | 6.19233093  |
| 1 | -6.43473876 | 1.04900085   | 7.21289896  |
| 6 | 1.30054942  | 8.19684261   | -5.08097507 |
| 1 | 1.17068664  | 8.09862669   | -6.17000731 |
| 7 | -7.01822485 | 6.60150156   | 4.08948266  |
| 7 | -7.49448040 | 7.27966978   | 3.05529614  |
| 1 | -4.83041050 | 8.81321347   | 1.14057804  |
| 6 | -6.01102884 | 5.76610036   | 3.66957616  |
| 1 | -2.84216336 | 9.04205271   | -0.29677371 |
| 6 | -4.81074239 | 8.30489995   | 0.16529543  |
| 7 | -6.80662680 | 6.88292968   | 1.96157220  |
| 6 | -3.68190354 | 8.43197015   | -0.65275631 |
| 1 | -7.90033229 | 6.74460106   | 0.16483814  |
| 1 | -2.79126330 | 6.17365700   | -4.00214119 |
| 6 | -7.14360504 | 7.40727172   | 0.62926215  |
| 6 | -5.87450219 | 5.93921315   | 2.29029298  |
| 1 | -0.76871221 | 6.41444206   | -5.39447336 |
| 6 | -2.12566161 | 7.02660366   | -3.82426969 |
| 6 | -5.91362587 | 7.52498710   | -0.24520313 |
| 6 | -0.96731994 | 7.14911897   | -4.60421434 |
| 6 | -3.61015816 | 7.79617500   | -1.91973708 |
| 6 | -2.41785096 | 7.95812942   | -2.79281095 |
| 1 | -7.62112508 | 8.39298160   | 0.79202930  |
| 6 | -0.03750578 | 8.18663340   | -4.36355362 |
| 6 | -5.83476506 | 6.85473004   | -1.48005680 |
| 6 | -4.70875452 | 6.99256510   | -2.30718070 |
| 6 | -1.51698128 | 9.03613849   | -2.61140650 |
| 6 | -0.34162547 | 9.13316168   | -3.36967575 |
| 1 | -6.66679292 | 6.21949360   | -1.80675723 |
| 1 | -1.71680919 | 9.80354653   | -1.85310157 |
| 1 | -4.70160402 | 6.46975309   | -3.27058281 |
| 1 | 0.36952948  | 9.94011343   | -3.15797415 |
| 6 | -5.72855154 | 2.68419563   | 5.97459225  |
| 6 | -5.33251539 | 4.82048968   | 4.61445592  |
| 6 | -6.07199733 | 3.46410084   | 4.69911680  |
| 1 | -5.32197635 | 5.29134703   | 5.61798449  |
| 1 | -4.27697053 | 4.66550499   | 4.31790251  |
| 1 | -4.65750049 | 2.39262621   | 5.98350656  |
| 1 | -5.88064740 | 3.35176799   | 6.84963401  |
| 1 | -5.83977792 | 2.86557939   | 3.79483770  |
| 1 | -7.16375892 | 3.64018510   | 4.67280636  |
| 1 | -5.20276194 | 5.49637976   | 1.55501275  |
| 1 | -7.66177424 | 1.66231841   | 6.03379726  |
| 1 | 1.86918857  | 9.11384612   | -4.85819985 |
| 6 | 2.28519998  | 0.84937755   | 1.08299634  |
| 6 | 1.57000958  | 1.15348763   | 2.32574713  |
| 6 | 2.53172677  | 1.86964123   | 0.14272877  |
| 6 | 1.12529792  | 2.46748473   | 2.58166166  |
| 6 | -0.20227081 | 2.69168850   | 3.16324457  |
| 6 | 0.70422355  | 0.01376779   | 2.63939700  |
| 6 | -0.57126385 | 0.22818155   | 3.19716276  |
| 6 | -1.03338606 | 1.59290080   | 3.46522795  |

|   |             |             |             |
|---|-------------|-------------|-------------|
| 6 | 1.95176686  | 0.32536527  | -1.72734491 |
| 6 | 1.69598174  | -0.73338125 | -0.74677343 |
| 6 | 2.35495388  | 1.60060766  | -1.28840021 |
| 6 | 1.85844916  | -0.47589413 | 0.62905525  |
| 6 | 0.88461664  | -0.99350765 | 1.59162393  |
| 6 | 0.55012525  | -1.51652692 | -1.21416996 |
| 6 | -0.38752626 | -2.01428096 | -0.28716085 |
| 6 | -0.21810431 | -1.75114063 | 1.14395499  |
| 6 | 0.82922873  | 2.67840940  | -2.93635133 |
| 6 | 0.41033329  | 1.35247907  | -3.39575043 |
| 6 | 1.77855485  | 2.79803060  | -1.90381699 |
| 6 | 0.96103852  | 0.19755664  | -2.80125252 |
| 6 | 0.09436852  | -0.93878622 | -2.48056654 |
| 6 | -1.02206390 | 1.41425337  | -3.70229735 |
| 6 | -1.85270778 | 0.31700434  | -3.39704735 |
| 6 | -1.28433532 | -0.88375613 | -2.77689110 |
| 6 | 0.47913673  | 4.65882938  | -0.88461527 |
| 6 | -0.51098102 | 4.53536929  | -1.95766724 |
| 6 | 1.60112835  | 3.80736596  | -0.85858941 |
| 6 | -0.33889510 | 3.56080717  | -2.96114562 |
| 6 | -1.48612599 | 2.77845946  | -3.43323709 |
| 6 | -1.83814169 | 4.76146973  | -1.37833741 |
| 6 | -2.94193203 | 4.00857586  | -1.83041136 |
| 6 | -2.76284093 | 2.99852645  | -2.87981104 |
| 6 | 1.37651622  | 3.52819620  | 1.60320338  |
| 6 | 0.20627586  | 4.41048377  | 1.57969271  |
| 6 | 2.06332555  | 3.23386873  | 0.40760558  |
| 6 | -0.23450783 | 4.96397096  | 0.35852026  |
| 6 | -1.66740718 | 5.02907327  | 0.05271589  |
| 6 | -0.77009881 | 3.89384654  | 2.54432266  |
| 6 | -2.14814826 | 3.95145625  | 2.24948988  |
| 6 | -2.60392984 | 4.52857539  | 0.98027728  |
| 6 | -4.33680926 | 2.15843378  | -1.31958852 |
| 6 | -3.91578031 | 3.48901938  | -0.86708529 |
| 6 | -3.75024283 | 3.74475119  | 0.51076865  |
| 6 | -4.57013882 | 1.13663743  | -0.37798277 |
| 6 | -3.42811738 | -0.52054841 | -1.83631293 |
| 6 | -3.18047437 | 0.54157927  | -2.81660797 |
| 6 | -3.62530610 | 1.85650159  | -2.56277147 |
| 6 | -4.11868600 | -0.23202929 | -0.63997182 |
| 6 | -2.53659100 | -1.65570842 | 0.65276841  |
| 6 | -1.81929659 | -1.95397722 | -0.59138466 |
| 6 | -2.25784513 | -1.39953785 | -1.81336872 |
| 6 | -3.66546216 | -0.81209000 | 0.62931304  |
| 6 | -2.88864720 | 0.32327783  | 2.70920596  |
| 6 | -1.71687543 | -0.55684892 | 2.73172358  |
| 6 | -1.54551734 | -1.52870255 | 1.72571946  |
| 6 | -3.83979655 | 0.20021920  | 1.67510079  |
| 6 | -3.99632183 | 2.68048444  | 1.48971898  |
| 6 | -3.01095422 | 2.81058243  | 2.56593457  |
| 6 | -2.46610215 | 1.65316591  | 3.16340251  |
| 6 | -4.39088364 | 1.40241580  | 1.05008507  |

### MC-PDI6 $\supset$ C60

QM1//QM2: BLYP-D3(BJ)/def2-SVP//GFN2-xTB

Only solute complex shown

| Atom | X            | Y           | Z           |
|------|--------------|-------------|-------------|
| 6    | -8.31824110  | 1.90603375  | -0.34675573 |
| 6    | -7.28578437  | 0.95306726  | -0.36901063 |
| 6    | -8.70365894  | 2.50562994  | 0.85560438  |
| 6    | -6.61922522  | 0.55882960  | 0.80850885  |
| 1    | -7.04114081  | 0.48875612  | -1.32976167 |
| 6    | -9.77434107  | 3.53356081  | 0.85126649  |
| 6    | -8.06954953  | 2.12497606  | 2.07042738  |
| 6    | -7.04283956  | 1.12187842  | 2.06442054  |
| 8    | -10.33391105 | 3.89503584  | -0.18961436 |
| 7    | -10.13252940 | 4.09274442  | 2.08910712  |
| 6    | -8.46432549  | 2.73834876  | 3.29307680  |
| 6    | -6.46058376  | 0.69058588  | 3.30494223  |
| 6    | -9.57361591  | 3.72611940  | 3.32531534  |
| 6    | -7.77410633  | 2.44409084  | 4.46643246  |
| 6    | -6.75749654  | 1.47382870  | 4.44820073  |
| 8    | -9.98909318  | 4.22371212  | 4.37584982  |
| 6    | -5.57736224  | -0.47039288 | 0.81312277  |
| 6    | -5.71883523  | -0.57555637 | 3.31182035  |
| 6    | -4.91171442  | -0.95669220 | -0.33837762 |
| 6    | -5.28739648  | -1.13273985 | 2.05503409  |
| 6    | -5.47357759  | -1.30791903 | 4.49117426  |
| 6    | -4.22388773  | -2.18151860 | -0.36101999 |
| 6    | -4.56236513  | -2.37359620 | 2.04613078  |
| 1    | -5.84278608  | -0.95435612 | 5.45646133  |
| 6    | -4.79243901  | -2.53546305 | 4.47038160  |
| 6    | -4.07180433  | -2.90788631 | 0.82036512  |
| 6    | -4.33204474  | -3.07312293 | 3.26307312  |
| 6    | -3.29011476  | -4.16674752 | 0.79778365  |
| 6    | -3.62793705  | -4.37746560 | 3.25746442  |
| 8    | -2.79325904  | -4.61447627 | -0.24306987 |
| 7    | -3.09095527  | -4.81247763 | 2.03404538  |
| 8    | -3.47972496  | -5.05706202 | 4.27987079  |
| 1    | -7.99842907  | 2.97860140  | 5.39586493  |
| 1    | -4.61346443  | -3.07202452 | 5.40999893  |
| 1    | -3.77286391  | -2.53419719 | -1.29424836 |
| 1    | -8.84207293  | 2.17719004  | -1.27169427 |
| 7    | -4.76772154  | -0.12696781 | -1.56044898 |
| 8    | -4.89798794  | -0.68010104 | -2.65895314 |
| 8    | -4.43799009  | 1.05709789  | -1.39119862 |
| 7    | -5.92715592  | 1.41565493  | 5.67065609  |
| 8    | -6.49384690  | 1.54028744  | 6.76739882  |
| 8    | -4.70061507  | 1.32020910  | 5.52323455  |
| 6    | 3.32769603   | 9.23735079  | 0.78940784  |
| 6    | 4.19187953   | 8.15781115  | 1.03395299  |
| 6    | 2.53143925   | 9.25094360  | -0.35945663 |
| 6    | 4.30290013   | 7.08634232  | 0.12758987  |
| 1    | 4.80303072   | 8.17692827  | 1.94312163  |
| 6    | 1.57091505   | 10.35837461 | -0.56918904 |
| 6    | 2.65212718   | 8.21252716  | -1.32541128 |
| 6    | 3.59260535   | 7.14616436  | -1.12437520 |
| 8    | 1.47631159   | 11.31450892 | 0.20619265  |
| 7    | 0.71444188   | 10.26719695 | -1.67838465 |
| 6    | 1.84391146   | 8.24023657  | -2.49687783 |
| 6    | 3.81203010   | 6.16465848  | -2.15729562 |
| 6    | 0.82978985   | 9.31062513  | -2.70378884 |

|   |              |             |             |
|---|--------------|-------------|-------------|
| 6 | 1.96038938   | 7.21849402  | -3.43427394 |
| 6 | 2.90654765   | 6.18970090  | -3.25287013 |
| 8 | 0.11276282   | 9.36330196  | -3.70507355 |
| 6 | 5.14463621   | 5.92247637  | 0.40121167  |
| 6 | 4.99260315   | 5.29523772  | -2.01976054 |
| 6 | 5.57917032   | 5.51417642  | 1.68477177  |
| 6 | 5.60347848   | 5.15310609  | -0.72000654 |
| 6 | 5.56578867   | 4.59745183  | -3.10121215 |
| 6 | 6.59817816   | 4.56303958  | 1.87438401  |
| 6 | 6.65426017   | 4.18953140  | -0.53484192 |
| 1 | 5.19215173   | 4.74321703  | -4.11711585 |
| 6 | 6.63348382   | 3.70084602  | -2.92052937 |
| 6 | 7.15873663   | 3.92444492  | 0.77107613  |
| 6 | 7.15587291   | 3.45963691  | -1.64674842 |
| 6 | 8.20273534   | 2.88908000  | 0.99116450  |
| 6 | 8.21121806   | 2.42837786  | -1.46326064 |
| 8 | 8.60222868   | 2.58742725  | 2.12144679  |
| 7 | 8.69187188   | 2.23509675  | -0.15164565 |
| 8 | 8.63754216   | 1.74660366  | -2.39660649 |
| 1 | 1.29948361   | 7.19469889  | -4.30664816 |
| 1 | 7.05871043   | 3.16788455  | -3.77864428 |
| 1 | 6.91471074   | 4.29831438  | 2.88943236  |
| 1 | 3.25009493   | 10.06381349 | 1.50689938  |
| 7 | 4.86802304   | 5.92151960  | 2.92236954  |
| 8 | 3.63250716   | 6.02963685  | 2.87417762  |
| 8 | 5.54533815   | 6.05328466  | 3.95112869  |
| 7 | 2.77570158   | 5.08381505  | -4.24025332 |
| 8 | 2.42828858   | 5.37645507  | -5.39190117 |
| 8 | 2.93539419   | 3.91808776  | -3.84402490 |
| 6 | -11.12143938 | 5.19321220  | 2.09238483  |
| 1 | -11.75136118 | 5.06837157  | 2.98849356  |
| 6 | -0.38563795  | 11.26282126 | -1.73137448 |
| 1 | -0.91584368  | 11.08138694 | -2.68099059 |
| 7 | -10.42467378 | 8.85533436  | 4.69598921  |
| 7 | -9.47371647  | 9.06477126  | 5.59851061  |
| 1 | -5.33415726  | 8.19880916  | 4.91131934  |
| 6 | -9.98657238  | 9.27366001  | 3.46092858  |
| 1 | -3.53436946  | 8.51059018  | 3.20777162  |
| 6 | -5.20552396  | 9.17552314  | 4.42443969  |
| 7 | -8.42592775  | 9.62029551  | 4.95329406  |
| 6 | -4.20658949  | 9.34708195  | 3.45152954  |
| 1 | -7.47015417  | 10.96848271 | 6.25058653  |
| 1 | -2.62284747  | 12.83472383 | 2.11547443  |
| 6 | -7.22254235  | 10.03480966 | 5.70870661  |
| 6 | -8.69384385  | 9.77191455  | 3.62107636  |
| 1 | -1.05910400  | 13.12063236 | 0.19144609  |
| 6 | -2.45306948  | 11.99733377 | 1.42366338  |
| 6 | -6.05669696  | 10.24383620 | 4.77368961  |
| 6 | -1.57651359  | 12.16084650 | 0.33763797  |
| 6 | -4.05052487  | 10.58639120 | 2.78045671  |
| 6 | -3.07657413  | 10.75076761 | 1.67131526  |
| 1 | -7.01621010  | 9.24306420  | 6.45116746  |
| 6 | -1.31972898  | 11.09385990 | -0.54661559 |
| 6 | -5.87964872  | 11.48995311 | 4.13869427  |
| 6 | -4.89557316  | 11.65823256 | 3.15638840  |
| 6 | -2.77659661  | 9.67318567  | 0.80423275  |

|   |              |             |             |
|---|--------------|-------------|-------------|
| 6 | -1.92071667  | 9.84480799  | -0.29145001 |
| 1 | -6.56116629  | 12.32143976 | 4.37210571  |
| 1 | -3.24526357  | 8.69375210  | 0.96726505  |
| 1 | -4.81984795  | 12.62254939 | 2.63904091  |
| 1 | -1.72030128  | 8.99057105  | -0.95262006 |
| 6 | -10.43204296 | 6.56520535  | 2.10876894  |
| 6 | -10.80578592 | 9.10582056  | 2.20654104  |
| 6 | -11.45509822 | 7.70871885  | 2.10565221  |
| 1 | -10.14657485 | 9.28123259  | 1.33258276  |
| 1 | -11.60803212 | 9.87336025  | 2.15225265  |
| 1 | -9.74682900  | 6.65006952  | 1.23990196  |
| 1 | -9.79247977  | 6.63652987  | 3.00930941  |
| 1 | -12.06575904 | 7.67007516  | 1.18001710  |
| 1 | -12.15046999 | 7.57330012  | 2.95955319  |
| 1 | -7.97006791  | 10.18895569 | 2.91985654  |
| 1 | -11.74603032 | 5.06879471  | 1.19392400  |
| 1 | 0.05527243   | 12.27458039 | -1.74777491 |
| 6 | -2.26256904  | -6.04065470 | 2.06704662  |
| 1 | -1.98414114  | -6.24503497 | 1.02157355  |
| 6 | 9.73784625   | 1.19515454  | 0.04572539  |
| 1 | 10.33191079  | 1.50422162  | 0.92025933  |
| 7 | 2.55005246   | -8.83474515 | 2.61115125  |
| 7 | 3.70681086   | -9.18120750 | 2.05968819  |
| 1 | 7.52781706   | -6.78352532 | 3.01540966  |
| 1 | 8.41050953   | -4.46742008 | 2.72909254  |
| 6 | 2.53836086   | -7.48056485 | 2.83039800  |
| 6 | 7.23606347   | -6.18996899 | 2.13574892  |
| 6 | 7.72725231   | -4.88393618 | 1.97793979  |
| 1 | 8.03382878   | -2.24326276 | 2.77460626  |
| 7 | 4.43972899   | -8.05633001 | 1.91468067  |
| 1 | 9.06171192   | -0.00413996 | 2.41886106  |
| 1 | 6.42696794   | -8.72318877 | 2.06509521  |
| 6 | 8.26274246   | -1.91246153 | 1.75260241  |
| 6 | 8.83139446   | -0.64403371 | 1.55736844  |
| 6 | 5.80776703   | -8.13441304 | 1.36023751  |
| 6 | 3.75409736   | -6.96899403 | 2.37421226  |
| 6 | 6.38881545   | -6.75593724 | 1.16065736  |
| 6 | 7.38931643   | -4.10814681 | 0.83939876  |
| 6 | 7.95855952   | -2.74801383 | 0.64941449  |
| 6 | 9.12571212   | -0.17740849 | 0.25699083  |
| 1 | 5.73872752   | -8.68376077 | 0.40101994  |
| 1 | 4.14944545   | -5.95432801 | 2.34597566  |
| 6 | 6.03436146   | -5.98782743 | 0.03169693  |
| 6 | 8.23428546   | -2.26029054 | -0.64950608 |
| 6 | 6.52660050   | -4.68593322 | -0.12778217 |
| 6 | 8.81298571   | -1.00044588 | -0.84417434 |
| 1 | 5.35100601   | -6.40283886 | -0.72317647 |
| 1 | 8.02223076   | -2.88988038 | -1.52233245 |
| 1 | 9.04214958   | -0.64715089 | -1.85514573 |
| 1 | 6.21932785   | -4.10439544 | -1.00562013 |
| 6 | 0.17080504   | -6.72294456 | 2.40768049  |
| 6 | 1.35506441   | -6.75876438 | 3.39692331  |
| 6 | -0.99936201  | -5.89054085 | 2.93927724  |
| 1 | 0.51804334   | -6.31390970 | 1.43517338  |
| 1 | -0.16019323  | -7.76002878 | 2.19980352  |
| 1 | -0.70148978  | -4.82527048 | 2.97990259  |



|   |             |             |             |
|---|-------------|-------------|-------------|
| 1 | -1.22577282 | -6.18667580 | 3.97976404  |
| 1 | 1.65588991  | -5.72735411 | 3.66615980  |
| 1 | 1.03329567  | -7.24858081 | 4.34028580  |
| 1 | -2.90132465 | -6.86772305 | 2.42913702  |
| 1 | 10.37627373 | 1.20829400  | -0.85255643 |
| 6 | 2.31711313  | 2.86817935  | -1.22148904 |
| 6 | 3.64749516  | 2.25872699  | -1.17699500 |
| 6 | 1.79479220  | 3.52104707  | -0.08792671 |
| 6 | 4.40227157  | 2.31046939  | 0.00916511  |
| 6 | 5.16741553  | 1.14232671  | 0.45387497  |
| 6 | 3.61303292  | 1.02299667  | -1.96164307 |
| 6 | 4.34214128  | -0.10729651 | -1.53585950 |
| 6 | 5.13220753  | -0.04725537 | -0.30200822 |
| 6 | -0.44084883 | 2.49952103  | -0.49541284 |
| 6 | 0.10509667  | 1.82410219  | -1.67724394 |
| 6 | 0.38908814  | 3.33003373  | 0.28502388  |
| 6 | 1.45570324  | 2.00608999  | -2.03277888 |
| 6 | 2.25510761  | 0.86674712  | -2.49091310 |
| 6 | -0.49789615 | 0.49232739  | -1.76186618 |
| 6 | 0.27204187  | -0.60472204 | -2.19939444 |
| 6 | 1.67326114  | -0.41397644 | -2.57241926 |
| 6 | -0.59374584 | 2.38810155  | 2.37344817  |
| 6 | -1.45484594 | 1.52517027  | 1.55977635  |
| 6 | 0.31171320  | 3.27003095  | 1.74722287  |
| 6 | -1.38049661 | 1.57982225  | 0.15312399  |
| 6 | -1.41330107 | 0.34059004  | -0.63038288 |
| 6 | -1.56875405 | 0.22959872  | 2.23790314  |
| 6 | -1.59939463 | -0.95875943 | 1.48421522  |
| 6 | -1.52040108 | -0.90264569 | 0.02157917  |
| 6 | 2.07114028  | 2.68828703  | 3.41197263  |
| 6 | 1.13250970  | 1.77124025  | 4.06116724  |
| 6 | 1.66870932  | 3.42351101  | 2.27901141  |
| 6 | -0.17347679 | 1.62353429  | 3.55204277  |
| 6 | -0.77460006 | 0.29085130  | 3.46711531  |
| 6 | 1.88511205  | 0.59679710  | 4.51276250  |
| 6 | 1.30450575  | -0.68524483 | 4.43266759  |
| 6 | -0.05082465 | -0.84024841 | 3.89833306  |
| 6 | 3.85941151  | 2.98012193  | 1.19120027  |
| 6 | 4.28378514  | 2.22567540  | 2.37198059  |
| 6 | 2.58408849  | 3.57468274  | 1.14507074  |
| 6 | 3.40430954  | 2.08086280  | 3.46245661  |
| 6 | 3.28953410  | 0.78774343  | 4.14148353  |
| 6 | 5.08930221  | 1.08801228  | 1.91710880  |
| 6 | 4.97663044  | -0.15830250 | 2.56923854  |
| 6 | 4.05658746  | -0.30999711 | 3.70173761  |
| 6 | 1.24276953  | -2.68755889 | 3.16536926  |
| 6 | 2.10436273  | -1.82606232 | 3.97765778  |
| 6 | 3.45315367  | -1.64061477 | 3.61725085  |
| 6 | 1.76414170  | -3.33609175 | 2.02687824  |
| 6 | -0.30691550 | -2.80572788 | 0.74758710  |
| 6 | -0.85179741 | -2.13722784 | 1.93263181  |
| 6 | -0.08893716 | -2.07728572 | 3.11684058  |
| 6 | 0.97260797  | -3.39858107 | 0.79466101  |
| 6 | 1.48733196  | -2.50644980 | -1.47404774 |
| 6 | 0.15706831  | -1.89673179 | -1.52231819 |
| 6 | -0.72299654 | -2.04368648 | -0.43310328 |

|   |            |             |             |
|---|------------|-------------|-------------|
| 6 | 1.88966654 | -3.24215380 | -0.33977223 |
| 6 | 4.15072448 | -2.20279481 | -0.43519764 |
| 6 | 3.73499374 | -1.44059770 | -1.61652331 |
| 6 | 2.42759750 | -1.58996063 | -2.12591253 |
| 6 | 3.24579556 | -3.08610570 | 0.19034392  |
| 6 | 3.99794574 | -2.31205056 | 2.43251430  |
| 6 | 4.93634653 | -1.39485207 | 1.78336102  |
| 6 | 5.01177792 | -1.34032433 | 0.37692380  |
| 6 | 3.17048413 | -3.14738154 | 1.65281881  |

## References:

- 1 T. Ziegler and A. Rauk, *Theor. Chim. Acta* 1977, **46**, 1-10.
- 2 T. Ziegler and A. Rauk, *Inorg. Chem.* 1979, **18**, 1558-1565.
- 3 T. Ziegler and A. Rauk, *Inorg. Chem.* 1979, **18**, 1755-1759.
- 4 S. Grimme, *J. Comput. Chem.* 2004, **25**, 1463-1473.
- 5 S. Grimme, *J. Comput. Chem.* 2006, **27**, 1787-1799.
- 6 F. Plasser and H. Lischka, *J. Chem. Theory Comput.* 2012, **8**, 2777-2789.
- 7 F. Plasser, S. A. Bäßler, M. Wormit and A. Dreuw, *J. Chem. Phys.* 2014, **141**, 024107.
- 8 A. V. Luzanov and O. A. Zhikol, *Int. J. Quantum Chem.* 2010, **110**, 902-924.
- 9 A. Klamt, G. Schüürmann, *J. Chem. Soc. Perkin Trans.* 1993, **2**, 799-805.
- 10 J. Tomasi, B. Mennucci and R. Cammi, *Chem. Rev.* 2005, **105**, 2999-3093.
- 11 A. A. Voityuk and S. F. Vyboishchikov, *Phys. Chem. Chem. Phys.* 2019, **21**, 18706-18713.
- 12 S. F. Vyboishchikov and A. A. Voityuk, *Phys. Chem. Chem. Phys.* 2020, **22**, 14591-14598.
- 13 A. Klamt, G. Schüürmann, *J. Chem. Soc. Perkin Trans.* 1993, **2**, 799-805.
- 14 J. L. Pascual-Ahuir, E. Silla, and I. Tuñón, *J. Comp. Chem.* 1994, **15**, 1127-1138.
- 15 A. Klamt, *J. Phys. Chem.* 1996, **100**, 3349-3353.
- 16 R. A. Marcus and N. Sutin, *Biochim. Biophys. Acta, Rev. Bioenerg.* 1985, **811**, 265-322.
- 17 A. A. Voityuk and N. Rösch, *J. Chem. Phys.* 2002, **117**, 5607-5616.
- 18 A. A. Voityuk, *Phys. Chem. Chem. Phys.* 2012, **14**, 13789-13793.
- 19 J. Ulstrup, J. Jortner, *J. Chem. Phys.* 1975, **63**, 4358-4368.
- 20 J. Jortner, *J. Chem. Phys.* 1976, **64**, 4860-4867.
- 21 R. F. W. Bader, *Chem. Rev.* 1991, **91**, 893-928.
- 22 R. F. W. Bader, *Atoms in Molecules: A Quantum Theory*; International Series of Monographs on Chemistry 22; Oxford University Press: Oxford, U.K., **1990**.
- 23 C. F. Matta, N. Castillo and R. J. Boyd, *J. Phys. Chem. B* 2006, **110**, 563-578.
- 24 C. R. Wick and T. Clark, *J. Mol. Model.* 2018, **24**, 142.
- 25 P. S. V. Kumar, V. Raghavendra and V. Subramanian, *J. Chem. Sci.* 2016, **128**, 1527-1536.
- 26 Keith, T. A. AIMAll, version 19.02.14; TK Gristmill Software: Overland Park, KS, **2019**.
- 27 E. Johnson, S. Keinan, P. Mori-Sánchez, J. Contreras-García, A. Cohen and W. Yang, *J. Am. Chem. Soc.* 2010, **132**, 6498-6506.

- 28 J. Contreras-García, E. Johnson, S. Keinan, R. Chaudret, J. Piquemal, D. Beratan and W. Yang, *J. Chem. Theory Comput.* 2011, **7**, 625–632.
- 29 J. Contreras-García, W. Yang and E. Johnson, *J. Phys. Chem. A*, 2011, **115**, 12983–12990.
- 30 T. Lu and F. Chen, *J. Comput. Chem.* 2012, **33**, 580-592.
- 31 W. Humphrey, A. Dalke and K. Schulten, *J. Molec. Graphics*, 1996, **14**, 33-38.
- 32 G. A. Zhurko, Chemcraft 1.80 (build 523b) - graphical program for visualization of quantum chemistry computations. (<https://chemcraftprog.com>).
